# Supplementary material for: Antibiotic-induced acceleration of type 1 diabetes alters maturation of innate intestinal immunity
Source: eLife. 2018 Jul 25;7:e37816. doi: 10.7554/eLife.37816 (PMC6085123; doi:10.7554/eLife.37816)
Supplement: Figure 1—source data 1. [file elife-37816-fig1-data1.xlsx]

## Sheet: T1D Male
T1D-Week	1PAT	1PATCON	3PAT	3PATCON
12	1
13	1
15	1
15	1
17	1
17	1
18	1
20	1
21	1
21	1
22	1
22	1
23	1
24	1
25	1
25	1
26	1
28	1
30	1
30	0
30	0
30	0
30	0
17	1
17		1
17		1
20		1
20		1
21		1
22		1
24		1
27		1
29		1
29		1
30		0
30		0
30		0
30		0
30		0
30		0
30		1
30		0
30		0
30		0
30		0
10			1
10			1
11			1
11			1
13			1
15			1
16			1
18			1
19			1
20			1
20			1
21			1
21			1
24			1
26			1
29			1
30			0
30			0
30			0
30			0
18				1
18				1
20				1
21				0
25				1
25				1
28				1
28				1
30				0
30				0
30				0
30				0
30				0
30				0
30				0
30				0
30				0
30				0
30				0
30				0

## Sheet: T1D female
Week	1PAT	1PATCON	3PAT	3PATCON
6	1
11	1
13	1
14	1
15	1
16	1
16	1
16	1
17	1
17	1
18	1
19	1
19	1
20	1
20	1
21	1
23	1
30	0
30	0
30	0
30	0
30	0
11		1
12		1
12		1
14		1
14		1
15		1
16		1
16		1
16		1
16		1
17		1
17		1
19		1
19		1
20		1
20		1
20		1
24		1
24		1
30		0
30		0
30		0
30		0
30		0
30		0
7			1
12			1
13			1
13			1
14			1
14			1
14			1
15			1
16			1
16			1
17			1
17			1
18			1
19			1
21			1
25			1
30			0
30			0
30			0
30			0
30			0
30			0
30			0
13				1
13				1
14				1
15				1
16				1
17				1
20				1
21				1
21				1
25				1
27				1
27				1
28				1
30				0
30				0
30				0
30				0
30				0
30				0
30				0
30				0
30				0

## Sheet: Pancreatic isletis
		Score0						Score1						Score2						Score3						Score4
		section1	section2	section3	section4	section5		section1	section2	section3	section4	section5		section1	section2	section3	section4	section5		section1	section2	section3	section4	section5		section1	section2	section3	section4	section5		TOTAL
	1PATcontrol-1	1	4	1	3	3	12	1	1	2	2	2	8	0	2	4	1	3	10	1	1	3	2	1	8	1	1	1	4	1	8	46
	1PATcontrol-2	5	3	5	5	4	22	1	2		1		4	2	3				5	0	2				2	0					0	33
	1PATcontrol-3	4	6	3	5	4	22	2	1	2	1	1	7	1	0		2	2	5	2	0	1	1	1	5	0					0	39
	1PATcontrol-4	6	4	5	4	7	26	0	1	2	1		4	0	3				3	0	1				1	0					0	34
	1PATcontrol-5	4	7	5	3	4	23	1	2	1	1	1	6	2	0	2	2	3	9	1	2	3		1	7	0					0	45
	1PATcontrol-6	6	5	10	8	6	35	1	0	1			2	0	1				1	0	0				0	0					0	38
							140	6	7	8	6	4	31	5	9	6	5	8	33	4	6	7	3	3	23	1	1	1	4	1	8	235
	1PAT-1	4	0	5	3	1	13	1	1	1	1	2	6	1	1				2	0	1				1	0			3	1	4	26
	1PAT-2	2	0	4	4	2	12	1	1	1	2	2	7	0	0	3		2	5	0	2	2	1	4	9	0	1				1	34
	1PAT-3	2	2	0		2	6	3	0	1		4	8	2	1	2	2	1	8	2	1	1	1	3	8	2	4	3	1		10	40
	1PAT-4	3	4	5	5	7	24	3	2	4	4	4	17	1	1	3	5	1	11	0	1	1			2	0					0	54
	1PAT-5	4	4	4	4	8	24	2	0	2	3	1	8	1	3	3			7	0	0	2		2	4	0					0	43
	1PAT-6	3	7	5	4	5	24	0	1		1	1	3	1	0	2		1	4	1	0				1	0					0	32
							103	10	5	9	11	14	49	6	6	13	7	5	37	3	5	6	2	9	25	2	5	3	4	1	15	229
	3PATcontrol-1	4	2	1	3	2	12	2	2	3	2	7	16	2	2	1	4	3	12	1	1	1	4	1	8	2		1	3		6	54
	3PATcontrol-2	6	7	5	3	5	26	1	2	1			4	0	0	2			2	0	0				0	2					2	34
	3PATcontrol-3	3	4	7	4	4	22	0	0	1		1	2	1	0				1	0	0	1			1	1					1	27
	3PATcontrol-4	9	5	4	5		23	1	1		1	2	5	2	1	1	2	1	7	2	0		2	1	5	0	2				2	42
	3PATcontrol-5	8	7	6	5	3	29	1	1	2	1	1	6	1	0				1	0			1		1	0					0	37
	3PATcontrol-6	1	3		2	1	7	0	0				0	0	0				0	0					0	0					0	7
							119	5	6	7	4	11	33	6	3	4	6	4	23	3	1	2	7	2	15	5	2	1	3	0	11	201
	3PAT-1	1	0		7		8	3	3	1	1	1	9	3	1	1	0		5	5	2	1	0	1	9	1	4	1	0	2	8	39
	3PAT-2	7	2	4		6	19	0	1	1			2	1	2	1			4	0					0	0			3		3	28
	3PAT-3	4	3	3	8	1	19	2	2	2	2	1	9	3	1	2	1	4	11	1		1	3	2	7	1	1	2	2		6	52
	3PAT-4	2	3	2	2	3	12	0	2			1	3	0	0				0	1					1	0					0	16
	3PAT-5	3	4	7	7	6	27	1	3	2	2	1	9	1	0	1	1		3	0	1		1		2	1					1	42
	3PAT-6	1	1	2	2	3	9	0	0	1	1	2	4	0	0			2	2	1	1	1	2	2	7	1					1	23
							94	6	11	7	6	6	36	8	4	5	2	6	25	8	4	3	6	5	26	4	5	3	5	2	19	200
	%	SCORE0	SCORE1	SCORE2	SCORE3	SCORE4
	1PATCON	0.614751	0.129704	0.135277	0.0912819	0.0289855
	1PAT	0.459254	0.20521	0.152579	0.110746	0.0722097
	3PATCON	0.688858	0.128205	0.0852961	0.05521	0.0424318
	3PAT	0.505541	0.175162	0.106831	0.129975	0.0824906
