# Supplementary material for: Antibiotic-induced acceleration of type 1 diabetes alters maturation of innate intestinal immunity
Source: eLife. 2018 Jul 25;7:e37816. doi: 10.7554/eLife.37816 (PMC6085123; doi:10.7554/eLife.37816)
Supplement: Figure 2—source data 1. [file elife-37816-fig2-data1.xlsx]

## Sheet: beta-diversity distance
Male												Female
Week3				Week5				Week7				Week3				Week5				Week7
1PCM21	1PM21	1PCvs1P_M21		1PCM35	1PM35	1PCvs1P_M35		1PCM49	1PM49	1PCvs1P_M49		1PCF21	1PF21	1PCvs1P_F21		1PCF35	1PF35	1PCvs1P_F35		1PCF49	1PF49	1PCvs1P_F49
0.5434	0	0.403567		0.370994	0.00218946	0.462411		0.624286	0.469011	0.278335		0.753804	0.016336	0.68965		0.520885	0.193132	0.643119		0.578597	0.272737	0.660331
0.599078	0.393498	0.364895		0.39682	0.0584731	0.46241		0.578894	0.468275	0.64239		0.753586	0.138951	0.287105		0.290433	0.257493	0.692447		0.248935	0.26334	0.678656
0.588878	0.392412	0.404611		0.458187	0.0110614	0.462411		0.565939	0.468275	0.600409		0.74842	0.137813	0.669858		0.30973	0.191078	0.70497		0.559796	0.263544	0.624794
0.646918	0.392412	0.403567		0.354185	0.26508	0.444472		0.607012	0.468275	0.614884		0.74842	0.244823	0.591637		0.485974	0.202732	0.692747		0.243414	0.27497	0.625027
0.643394	0.385011	0.366007		0.454877	0.216315	0.457264		0.614955	0.424648	0.632973		0.745213	0.164101	0.307046		0.269429	0.256553	0.691033		0.296508	0.352518	0.671709
0.631631	0.377799	0.245571		0.432596	0.14321	0.461276		0.188031	0.422841	0.634251		0.74508	0.257771	0.713642		0.642832	0.192101	0.705108		0.525762	0.283151	0.661298
0.563615	0.376665	0.234816		0.553616	0.214178	0.524109		0.582012	0.422701	0.260222		0.7417	0.176529	0.724097		0.47208	0.191078	0.692598		0.423765	0.413923	0.678841
0.595694	0.376665	0.245228		0.494204	0.210824	0.49779		0.327751	0.422362	0.603332		0.7417	0.181745	0.739947		0.417596	0.278298	0.692747		0.450009	0.445798	0.692495
0.592165	0.371794	0.368042		0.552965	0.297037	0.471215		0.328191	0.420119	0.390808		0.714405	0.249867	0.703282		0.458919	0.187425	0.64794		0.427006	0.419341	0.679637
0.145878	0.362979	0.227873		0.449916	0.173458	0.477387		0.313672	0.41745	0.391221		0.713383	0.382553	0.705437		0.372658	0.261192	0.693057		0.413594	0.283581	0.667846
0.565344	0.36177	0.366193		0.518211	0.245952	0.40449		0.339193	0.415072	0.382355		0.709363	0.184323	0.699017		0.43287	0.19937	0.663716		0.37931	0.324201	0.677384
0.255389	0.36177	0.2692		0.467519	0.199347	0.495886		0.64485	0.414133	0.382679		0.708808	0.21252	0.687389		0.399754	0.337774	0.698764		0.372914	0.326017	0.644301
0.143236	0.354071	0.29966		0.523242	0.25057	0.459368		0.654491	0.414133	0.65353		0.705906	0.280996	0.67273		0.374293	0.251552	0.647259		0.377263	0.353593	0.643857
0.183121	0.353787	0.174811		0.419865	0.222453	0.432189		0.58682	0.414133	0.66539		0.705227	0.345757	0.682667		0.408251	0.339915	0.647259		0.373915	0.389682	0.670212
0.264371	0.35315	0.295375		0.494919	0.282398	0.454753		0.367972	0.407984	0.629519		0.704254	0.274144	0.659882		0.308804	0.311182	0.645029		0.58251	0.380014	0.656085
0.718198	0.351992	0.389544		0.576684	0.407232	0.462348		0.394978	0.407049	0.389237		0.70399	0.363929	0.644006		0.344735	0.299312	0.671264		0.652833	0.370624	0.687078
0.682593	0.346559	0.262152		0.499887	0.269126	0.45962		0.551151	0.407049	0.417036		0.70399	0.249461	0.273417		0.616439	0.366406	0.651736		0.676394	0.364873	0.684886
0.567333	0.341296	0.245596		0.488158	0.336577	0.5325		0.52927	0.407049	0.559986		0.702207	0.24599	0.273417		0.434245	0.321417	0.649027		0.666788	0.342937	0.666323
0.151096	0.340492	0.246637		0.508321	0.296383	0.469095		0.337669	0.406269	0.542851		0.698056	0.191144	0.337291		0.641005	0.264071	0.646648		0.63684	0.30722	0.668681
0.357426	0.340015	0.247686		0.343479	0.0584699	0.518366		0.50492	0.405425	0.278335		0.697141	0.373502	0.344827		0.656287	0.304632	0.627637		0.682704	0.384101	0.690039
0.345457	0.340015	0.235921		0.568111	0.00890103	0.518366		0.402615	0.405425	0.64239		0.691533	0.124651	0.342027		0.651526	0.098522	0.658643		0.585545	0.211015	0.678043
0.399721	0.336712	0.252366		0.556578	0.263462	0.479592		0.389891	0.405425	0.600409		0.691533	0.125662	0.357345		0.580594	0.00251252	0.646364		0.510304	0.211169	0.258347
0.40861	0.335503	0.252366		0.565886	0.216318	0.58811		0.643534	0.40477	0.614884		0.689452	0.235644	0.769632		0.514719	0.0142867	0.261551		0.481937	0.175791	0.302527
0.392872	0.334297	0.673127		0.545312	0.143214	0.588109		0.43852	0.403527	0.632973		0.684245	0.176601	0.781986		0.550893	0.0995403	0.321981		0.42229	0.276844	0.279943
0.352508	0.323879	0.680153		0.439035	0.214182	0.58811		0.673836	0.402613	0.634251		0.673644	0.268943	0.733815		0.485378	0.00126282	0.370195		0.578922	0.231085	0.278835
0.35532	0.322559	0.673445		0.448503	0.209027	0.559469		0.67395	0.402613	0.260222		0.67048	0.163295	0.695498		0.530385	0.00251252	0.323175		0.14241	0.391145	0.291374
0.357606	0.322559	0.673127		0.421914	0.297035	0.589089		0.660759	0.402613	0.603332		0.668135	0.168456	0.297674		0.223035	0.154295	0.316341		0.518288	0.295561	0.358959
0.299334	0.320215	0.680458		0.439049	0.173461	0.599918		0.673405	0.400807	0.390808		0.668135	0.262568	0.675588		0.457967	0.0141748	0.370709		0.515051	0.35143	0.280217
0.605113	0.319678	0.650675		0.40286	0.24427	0.658136		0.532786	0.399868	0.391221		0.667302	0.393115	0.597732		0.288519	0.106285	0.322581		0.536893	0.246441	0.356579
0.33851	0.318925	0.644972		0.412111	0.199345	0.642903		0.514699	0.399868	0.382355		0.666945	0.171061	0.318824		0.615828	0.0312919	0.323175		0.600301	0.305774	0.428641
0.652108	0.317641	0.650028		0.410264	0.250573	0.619385		0.589547	0.399868	0.382679		0.6638	0.2274	0.719047		0.615941	0.38343	0.372939		0.551568	0.323502	0.415019
0.58512	0.316392	0.684725		0.53549	0.2207	0.619402		0.696169	0.399406	0.65353		0.662624	0.270703	0.728988		0.653182	0.294231	0.331628		0.661507	0.315273	0.280596
0.551039	0.316392	0.622169		0.416016	0.282396	0.637466		0.703102	0.396602	0.66539		0.66223	0.338491	0.744806		0.582013	0.384096	0.374119		0.573782	0.328729	0.252827
0.651471	0.314972	0.67991		0.565152	0.40723	0.626085		0.484913	0.396128	0.629519		0.661786	0.266768	0.703734		0.59768	0.310971	0.341222		0.594542	0.347456	0.260671
0.570872	0.313177	0.590843		0.486728	0.269124	0.594841		0.535286	0.39565	0.389237		0.661518	0.355591	0.705896		0.608068	0.29798	0.315225		0.595687	0.337904	0.33855
0.465406	0.306447	0.610257		0.669005	0.336575	0.546467		0.544297	0.39565	0.417036		0.65808	0.239884	0.704726		0.572616	0.262807	0.315225		0.610474	0.363204	0.390869
0.521196	0.302181	0.606037		0.611498	0.296381	0.595927		0.448309	0.39565	0.559986		0.65808	0.235325	0.687775		0.613929	0.192961	0.284694		0.571832	0.342319	0.352694
0.596798	0.302181	0.609444		0.554835	0.0663818	0.612497		0.326971	0.391388	0.542851		0.657545	0.202841	0.678414		0.531447	0.103271	0.363234		0.26894	0.298924	0.343741
0.617297	0.300743	0.606471		0.543274	0.29445	0.597499		0.595271	0.391374	0.27948		0.657234	0.365701	0.683011		0.57795	0.168154	0.292075		0.214305	0.36486	0.337487
0.429027	0.300743	0.650183		0.552563	0.258442	0.644204		0.398724	0.390416	0.642674		0.65702	0.00131926	0.657614		0.213538	0.0984018	0.280885		0.329054	0.00189277	0.303993
0.41701	0.300743	0.578963		0.531497	0.193132	0.596498		0.634419	0.390416	0.600738		0.656701	0.142285	0.644186		0.491465	0.109138	0.338508		0.323363	0.188961	0.317066
0.372534	0.300743	0.644242		0.472219	0.256525	0.639577		0.634551	0.390416	0.615238		0.656366	0.284173	0.285982		0.305868	0.00112957	0.260366		0.256811	0.0989908	0.343723
0.368266	0.30048	0.644774		0.493412	0.252009	0.639577		0.617564	0.383408	0.633285		0.655826	0.364374	0.285982		0.356589	0.0973822	0.260295		0.321841	0.204883	0.658142
0.387586	0.299067	0.637789		0.480449	0.32896	0.594327		0.6337	0.374864	0.634535		0.655552	0.0485155	0.328738		0.306767	0.0984018	0.289909		0.612775	0.369247	0.677551
0.305313	0.299067	0.64589		0.431432	0.212645	0.567415		0.550668	0.374864	0.261489		0.653435	0.0530292	0.33629		0.630201	0.226704	0.593208		0.638451	0.243023	0.677642
0.308442	0.29855	0.64589		0.45017	0.276992	0.567414		0.49124	0.374864	0.603668		0.65002	0.172765	0.333454		0.623834	0.109037	0.634705		0.608717	0.217693	0.67789
0.624651	0.297815	0.702733		0.438056	0.230299	0.567415		0.554871	0.374598	0.39163		0.648751	0.333577	0.349036		0.599264	0.18394	0.650979		0.605761	0.222418	0.664049
0.315067	0.297476	0.708688		0.408714	0.282665	0.538958		0.666878	0.364361	0.390952		0.648485	0.0558485	0.77052		0.305905	0.124311	0.635097		0.617462	0.308001	0.713637
0.668502	0.296359	0.703002		0.516734	0.262377	0.569226		0.674689	0.363911	0.383142		0.648485	0.130264	0.782567		0.450982	0.42591	0.63286		0.253995	0.3257	0.677574
0.60669	0.296359	0.702733		0.395145	0.229591	0.580327		0.444905	0.355592	0.382428		0.647872	0.182899	0.734708		0.207253	0.34537	0.651157		0.291799	0.304687	0.684912
0.585402	0.296109	0.708946		0.576657	0.359177	0.638479		0.477354	0.354401	0.653286		0.646443	0.421846	0.680045		0.583103	0.316184	0.634902		0.515157	0.195128	0.727531
0.66784	0.295722	0.67416		0.485083	0.302665	0.622494		0.40715	0.354401	0.665631		0.645955	0.358166	0.387746		0.451867	0.362322	0.635097		0.432173	0.343988	0.717534
0.558534	0.294258	0.678127		0.647012	0.366753	0.599439		0.50508	0.354401	0.629249		0.643866	0.285271	0.659447		0.382556	0.350255	0.584758		0.437052	0.334333	0.676098
0.481896	0.294258	0.68328		0.588602	0.327647	0.597633		0.580725	0.354139	0.390136		0.643443	0.335664	0.64846		0.449278	0.318421	0.633393		0.408939	0.355005	0.642481
0.522012	0.293484	0.706379		0.179269	0.255818	0.616614		0.49431	0.350059	0.417855		0.641968	0.341488	0.24296		0.430452	0.259953	0.604003		0.354164	0.320883	0.642047
0.617753	0.291147	0.659021		0.0219909	0.208185	0.604029		0.571922	0.349667	0.560425		0.641968	0.303289	0.705944		0.399645	0.184239	0.639704		0.392133	0.275301	0.668834
0.653486	0.288011	0.699251		0.099088	0.134322	0.573218		0.572102	0.349124	0.542598		0.640986	0.300308	0.717611		0.412797	0.239578	0.585605		0.342778	0.361618	0.705289
0.317878	0.287527	0.627841		0.6842	0.206027	0.525476		0.593458	0.349124	0.278335		0.640366	0.141152	0.73418		0.325574	0.0142589	0.585605		0.354946	0.18911	0.690197
0.307527	0.286514	0.64614		0.667157	0.215484	0.576181		0.60805	0.349124	0.64239		0.640107	0.284887	0.688771		0.398963	0.0972722	0.587414		0.390524	0.0990558	0.687996
0.287973	0.286514	0.634902		0.687425	0.302214	0.592567		0.438719	0.345987	0.600409		0.638975	0.364936	0.691155		0.310248	0.00125128	0.619645		0.584096	0.203535	0.664898
0.406725	0.286287	0.635498		0.627969	0.180509	0.575502		0.516418	0.344932	0.614884		0.638954	0.0497247	0.690126		0.345502	1.7717e-09	0.592645		0.65546	0.368241	0.667272
0.378697	0.28604	0.633869		0.664038	0.250166	0.62286		0.466667	0.344932	0.632973		0.638284	0.054247	0.67172		0.554015	0.156116	0.590699		0.675334	0.243192	0.688989
0.42551	0.28604	0.683124		0.629745	0.192031	0.572122		0.576758	0.344932	0.634251		0.638284	0.173699	0.662552		0.412365	0.0141471	0.588243		0.66556	0.217849	0.676977
0.606665	0.285793	0.608126		0.631342	0.242795	0.614553		0.588562	0.342815	0.260222		0.638173	0.334183	0.667611		0.603372	0.104034	0.563808		0.633517	0.221124	0.290908
0.361984	0.284637	0.667959		0.258467	0.212612	0.614553		0.338682	0.341518	0.603332		0.635765	0.0570643	0.639573		0.621677	0.0287814	0.597601		0.681705	0.306989	0.331303
0.644177	0.284331	0.668423		0.605639	0.27468	0.570009		0.389834	0.33909	0.390808		0.635765	0.129098	0.692154		0.595638	0.38448	0.584335		0.579773	0.325912	0.165316
0.580974	0.28432	0.671664		0.535166	0.400176	0.305145		0.38371	0.338505	0.391221		0.634828	0.183811	0.200248		0.565472	0.2955	0.615176		0.517029	0.303636	0.163968
0.550684	0.28432	0.669395		0.55058	0.261955	0.305144		0.619977	0.336395	0.382355		0.634381	0.422293	0.200248		0.534561	0.385078	0.669502		0.470972	0.193838	0.323078
0.639849	0.284214	0.669395		0.395185	0.32914	0.305145		0.306544	0.33492	0.382679		0.633543	0.357319	0.256742		0.514075	0.312247	0.681554		0.45252	0.343007	0.248243
0.439605	0.283068	0.657039		0.276153	0.289126	0.28513		0.654659	0.333375	0.65353		0.63322	0.285993	0.264349		0.461416	0.299279	0.66979		0.564691	0.333323	0.298526
0.435568	0.282483	0.636963		0.172775	0.230095	0.298863		0.654788	0.332994	0.66539		0.63314	0.336254	0.261205		0.255802	0.26419	0.668149		0.547828	0.354084	0.383645
0.45894	0.282469	0.657343		0.106974	0.160443	0.37358		0.654714	0.332021	0.629519		0.63314	0.342136	0.279074		0.609777	0.194642	0.681688		0.562834	0.319862	0.336799
0.610323	0.279887	0.657039		0.687948	0.126906	0.416934		0.673832	0.33151	0.389237		0.631172	0.303938	0.762767		0.404739	0.105317	0.669647		0.619804	0.274139	0.318601
0.556481	0.278481	0.637285		0.618674	0.136544	0.389609		0.518956	0.331495	0.417036		0.631172	0.300976	0.774842		0.350398	0.169951	0.66979		0.574932	0.360702	0.31019
0.231706	0.277343	0.666228		0.69121	0.233334	0.360233		0.501353	0.330952	0.559986		0.627872	0.233197	0.730804		0.380518	0.110144	0.63421		0.676146	0.261372	0.328715
0.338521	0.276399	0.662391		0.57201	0.129822	0.367491		0.525247	0.329722	0.542851		0.627872	0.307028	0.680196		0.366604	0.0130239	0.674122		0.594094	0.21143	0.334699
0.402261	0.275479	0.659943		0.668001	0.0817792	0.420927		0.674413	0.32811	0.206494		0.626361	0.179618	0.388257		0.38008	0.0142589	0.644114		0.614968	0.294565	0.3833
0.374173	0.275321	0.642996		0.634039	0.217059	0.410147		0.682405	0.325414	0.646791		0.620707	0.184845	0.659604		0.358566	0.166371	0.678818		0.616023	0.395293	0.295611
0.381768	0.275075	0.606061		0.635328	0.19725	0.342175		0.408548	0.32496	0.605877		0.620039	0.27554	0.648626		0.335171	0.0259359	0.618421		0.629703	0.358509	0.367842
0.663578	0.274147	0.646366		0.253812	0.234281	0.199479		0.450193	0.324303	0.591881		0.619625	0.401928	0.243741		0.330406	0.116809	0.618421		0.594621	0.230244	0.359305
0.3888	0.274147	0.607478		0.61529	0.1943	0.441154		0.606686	0.324303	0.629818		0.618242	0.187416	0.706071		0.338097	0.0430284	0.613633		0.308634	0.319938	0.396097
0.701813	0.272398	0.624927		0.539326	0.326056	0.429724		0.281539	0.324303	0.637674		0.618242	0.239584	0.717721		0.283378	0.378475	0.639318		0.23509	0.338509	0.36712
0.644852	0.265802	0.621164		0.554449	0.297072	0.354988		0.645095	0.320309	0.177249		0.617924	0.283403	0.734283		0.582478	0.304181	0.62765		0.386154	0.316818	0.333837
0.622161	0.264671	0.63012		0.269774	0.255572	0.447305		0.645218	0.32007	0.608875		0.616949	0.429695	0.688916		0.361517	0.379465	0.625476		0.381195	0.332226	0.402336
0.697908	0.263563	0.625803		0.283219	0.323708	0.332525		0.62766	0.319177	0.312021		0.615783	0.251693	0.691299		0.605671	0.30494	0.629202		0.319643	0.339667	0.609063
0.417268	0.262787	0.660532		0.0897917	0.0971649	0.434714		0.648817	0.319177	0.312498		0.615352	0.365881	0.690268		0.621311	0.291841	0.611374		0.337916	0.329113	0.632571
0.431021	0.261996	0.604122		0.687661	0.174792	0.434714		0.479132	0.319177	0.379313		0.614979	0.285248	0.671877		0.61432	0.273229	0.638975		0.636038	0.369868	0.633219
0.472636	0.261996	0.661003		0.67082	0.186455	0.353868		0.404655	0.318434	0.379585		0.614979	0.2231	0.662706		0.538655	0.185012	0.628076		0.666055	0.334114	0.633482
0.670383	0.261865	0.661859		0.690922	0.278995	0.33956		0.529196	0.317951	0.648332		0.614742	0.251672	0.66776		0.491984	0.116129	0.311973		0.629658	0.285941	0.613781
0.656634	0.261602	0.655619		0.632043	0.146776	0.339558		0.670132	0.315815	0.656734		0.613445	0.250745	0.639749		0.504935	0.180252	0.401003		0.627069	0.358911	0.673477
0.274466	0.259986	0.662802		0.662686	0.22369	0.33956		0.677138	0.314461	0.58916		0.612539	0.147497	0.692291		0.371881	0.0984018	0.438948		0.276511	0.291946	0.633248
0.370126	0.259952	0.662802		0.62814	0.332976	0.319478		0.465535	0.312813	0.335373		0.610386	0.248437	0.201138		0.321032	0.0972722	0.401936		0.500619	0.332816	0.640848
0.354561	0.258366	0.730249		0.634974	0.214391	0.333382		0.461138	0.312654	0.346512		0.609907	0.268399	0.201138		0.560944	0.227463	0.396606		0.373065	0.197624	0.693105
0.344596	0.258366	0.734942		0.252252	0.183757	0.392857		0.574233	0.311418	0.568902		0.609907	0.302104	0.257481		0.562149	0.110043	0.439356		0.430093	0.144132	0.680072
0.660198	0.256934	0.73046		0.609527	0.249361	0.435896		0.306448	0.311418	0.550357		0.608261	0.417915	0.265088		0.600252	0.182918	0.401472		0.439405	0.289919	0.631779
0.36553	0.256934	0.730249		0.538369	0.381091	0.409916		0.306935	0.311418	0.355107		0.607556	0.247044	0.261947		0.536387	0.123183	0.401936		0.330779	0.38316	0.594841
0.698823	0.256923	0.735146		0.55474	0.354406	0.380374		0.374969	0.310425	0.691171		0.605281	0.292639	0.279792		0.535374	0.426364	0.383148		0.335149	0.398872	0.594886
0.644695	0.255404	0.718126		0.390783	0.306607	0.387586		0.37518	0.3099	0.649499		0.60481	0.297935	0.762454		0.55457	0.345914	0.409466		0.357261	0.36681	0.62474
0.618413	0.255404	0.71271		0.269212	0.381654	0.300733		0.643847	0.305638	0.663312		0.604084	0.379984	0.774916		0.518886	0.316726	0.369696		0.339512	0.239267	0.666855
0.698147	0.254966	0.717549		0.675237	0.0943614	0.429753		0.64773	0.304463	0.624072		0.604084	0.213206	0.730448		0.559937	0.362867	0.417922		0.292239	0.391062	0.648767
0.440279	0.253762	0.738286		0.656914	0.107161	0.362368		0.578003	0.304285	0.68562		0.602672	0.377215	0.677652		0.474658	0.35081	0.352188		0.520217	0.381921	0.645936
0.382432	0.253537	0.702569		0.678496	0.216417	0.223738		0.288828	0.304015	0.340174		0.6021	0.189478	0.440902		0.526283	0.319011	0.352188		0.607063	0.414124	0.620976
0.433157	0.253461	0.73602		0.614638	0.0592648	0.459256		0.321273	0.293162	0.601814		0.60079	0.152231	0.65793		0.254227	0.260657	0.329693		0.633818	0.382809	0.622792
0.667166	0.252287	0.670241		0.653274	0.15181	0.448383		0.556707	0.292091	0.417667		0.60038	0.131458	0.59313		0.409784	0.185084	0.397864		0.622273	0.340926	0.647112
0.653645	0.250738	0.686231		0.616498	0.281203	0.363656		0.55073	0.291156	0.418045		0.600349	0.266017	0.191978		0.334754	0.240327	0.355738		0.585071	0.404507	0.634188
0.407437	0.250375	0.682881		0.619663	0.141834	0.444071		0.624623	0.290655	0.441283		0.598328	0.354871	0.702754		0.379821	0.00125129	0.345625		0.638998	0.209146	0.599171
0.389703	0.249848	0.685876		0.181183	0.105041	0.351644		0.624764	0.285675	0.442409		0.598048	0.372423	0.714329		0.336919	0.15521	0.413317		0.575065	0.235669	0.624823
0.384986	0.249343	0.679429		0.597592	0.180722	0.431355		0.61072	0.284987	0.685797		0.598009	0.282051	0.688555		0.597259	0.012912	0.36292		0.520888	0.209956	0.618695
0.649587	0.24887	0.717924		0.521294	0.329919	0.431355		0.623257	0.284392	0.693079		0.597723	0.398416	0.686031		0.587299	0.105155	0.346494		0.485441	0.0401361	0.61835
0.400765	0.247308	0.662088		0.539009	0.303927	0.349988		0.465616	0.284262	0.648844		0.59599	0.35512	0.688338		0.558906	0.0300317	0.362872		0.409622	0.162885	0.597592
0.676527	0.246496	0.713471		0.341119	0.245807	0.311707		0.395597	0.282072	0.406338		0.595376	0.387955	0.687387		0.55295	0.383957	0.557655		0.492133	0.187532	0.655143
0.624426	0.2463	0.713811		0.204137	0.332707	0.310412		0.464537	0.280135	0.432337		0.595358	0.393462	0.66679		0.429002	0.294869	0.630596		0.363825	0.19282	0.618149
0.600665	0.2463	0.708123		0.255282	0.0127999	0.311707		0.640045	0.279619	0.619509		0.593966	0.344017	0.658164		0.387333	0.384589	0.647212		0.389267	0.229092	0.623839
0.675874	0.245599	0.714524		0.244722	0.132389	0.292895		0.648364	0.277626	0.602701		0.592848	0.2991	0.662314		0.458495	0.311612	0.630997		0.452798	0.202676	0.677012
0.505183	0.242877	0.714524		0.317605	0.144239	0.304119		0.418896	0.276807	0.279977		0.592804	0.336085	0.638817		0.381581	0.298633	0.628712		0.339826	0.189969	0.671236
0.411442	0.242041	0.729198		0.340279	0.117755	0.36609		0.415433	0.276388	0.693912		0.591374	0.26997	0.686786		0.390195	0.263502	0.647394		0.350135	0.211865	0.610184
0.49302	0.24172	0.733947		0.381636	0.249398	0.409846		0.000723347	0.275715	0.64496		0.590979	0.242258	0.298388		0.411729	0.193806	0.630798		0.365739	0.166491	0.593821
0.643561	0.240645	0.729412		0.35299	0.212269	0.38182		0.101592	0.273427	0.644092		0.590885	0.216321	0.298388		0.359821	0.104299	0.630997		0.372678	0.105247	0.59447
0.64074	0.240511	0.729198		0.674399	0.181464	0.352312		0.148216	0.272673	0.672206		0.588425	0.360149	0.339294		0.413773	0.169057	0.580197		0.355488	0.21814	0.603369
0.19521	0.24048	0.734154		0.365636	0.0921943	0.359638		0.541629	0.271441	0.68328		0.588366	0.0535439	0.346826		0.298643	0.156116	0.629252		0.502953	0.257361	0.648959
0.35693	0.239944	0.71691		0.519133	0.249871	0.416387		0.581184	0.270965	0.234593		0.58822	0.152641	0.344035		0.336863	0.0141471	0.599648		0.577812	0.232185	0.624328
0.591221	0.239167	0.711463		0.445925	0.271339	0.402769		0.467093	0.269447	0.658038		0.585922	0.317228	0.224917		0.52204	0.104034	0.635629		0.620491	0.190261	0.62112
0.311955	0.239049	0.71633		0.715883	0.210951	0.334116		0.218442	0.268863	0.36254		0.583955	0.0330209	0.755015		0.377842	0.0287814	0.563692		0.616975	0.306809	0.605855
0.632072	0.238945	0.737325		0.675052	0.299016	0.191353		0.174999	0.268621	0.363		0.583766	0.12982	0.768537		0.55679	0.38448	0.563692		0.574475	0.326249	0.601221
0.566094	0.238894	0.699741		0.299202	0.122386	0.434547		0.551132	0.26518	0.427273		0.581856	0.141795	0.722931		0.578303	0.2955	0.564994		0.619015	0.317196	0.626741
0.538667	0.238741	0.733583		0.29004	0.135676	0.422835		0.527199	0.263685	0.428281		0.571836	0.395212	0.703274		0.566582	0.385078	0.599391		0.56587	0.355116	0.61421
0.63151	0.238362	0.668623		0.396053	0.107211	0.349584		0.102176	0.262897	0.689173		0.57089	0.341631	0.334196		0.563629	0.312247	0.58151		0.500266	0.337092	0.578093
0.519208	0.238195	0.684741		0.429563	0.257807	0.442988		0.147574	0.262162	0.696704		0.569174	0.274836	0.683979		0.499343	0.299279	0.579016		0.462134	0.326996	0.588843
0.463634	0.23545	0.681362		0.426193	0.223402	0.326032		0.541265	0.262041	0.636623		0.569026	0.326261	0.563428		0.507125	0.26419	0.583951		0.39934	0.346133	0.589909
0.462796	0.235208	0.684378		0.651397	0.191188	0.430229		0.58133	0.260405	0.335466		0.566591	0.331041	0.227091		0.655676	0.194642	0.559006		0.341534	0.310291	0.589506
0.595767	0.234962	0.677946		0.428718	0.102181	0.430229		0.466668	0.260188	0.368221		0.564673	0.293591	0.725239		0.673557	0.105317	0.59312		0.327238	0.268201	0.565668
0.610096	0.234898	0.716711		0.483697	0.259053	0.348688		0.218983	0.258717	0.623904		0.562484	0.266217	0.728903		0.701142	0.169951	0.579737		0.406714	0.352923	0.631572
0.324778	0.234036	0.660397		0.441693	0.279828	0.259894		0.17557	0.257848	0.600695		0.561693	0.153573	0.711488		0.655935	0.145758	0.233255		0.401719	0.101404	0.512331
0.614676	0.233767	0.712214		0.644645	0.220384	0.259892		0.551331	0.257058	0.305053		0.559515	0.319672	0.708201		0.65898	0.0565963	0.292733		0.461395	0.218707	0.563434
0.26566	0.233767	0.712558		0.652359	0.307633	0.259894		0.526782	0.256779	0.670704		0.55749	0.0323338	0.70964		0.669387	0.160357	0.329922		0.457861	0.322491	0.59824
0.653252	0.232628	0.706823		0.290973	0.23878	0.240151		0.0478279	0.255025	0.630119		0.557111	0.109925	0.711494		0.627593	0.45398	0.290926		0.48507	0.338772	0.587651
0.591504	0.231998	0.713281		0.356998	0.209971	0.253052		0.532766	0.250942	0.577162		0.553982	0.164045	0.700372		0.662276	0.377813	0.301178		0.398061	0.335888	0.518231
0.565699	0.230185	0.713281		0.36974	0.330413	0.322834		0.574946	0.250721	0.659426		0.553802	0.424617	0.684837		0.615883	0.449382	0.329081		0.482556	0.236373	0.500356
0.652648	0.226839	0.719322		0.3619	0.308576	0.370106		0.495002	0.249787	0.644995		0.549535	0.361258	0.694919		0.645097	0.395012	0.291826		0.546527	0.355994	0.502363
0.515471	0.22653	0.724597		0.672561	0.28277	0.337039		0.294821	0.247467	0.280135		0.548192	0.276905	0.682812		0.164172	0.383376	0.290926		0.518742	0.347114	0.523411
0.462326	0.225757	0.71956		0.370397	0.186305	0.306007		0.255574	0.246611	0.630809		0.543625	0.360235	0.656958		0.539408	0.297244	0.361838		0.503313	0.368011	0.561175
0.457375	0.225757	0.719322		0.555871	0.32239	0.313925		0.546514	0.245459	0.205183		0.539994	0.350536	0.298805		0.154835	0.265619	0.285199		0.514197	0.33671	0.527734
0.618243	0.220531	0.724826		0.443648	0.350993	0.377685		0.517607	0.244937	0.205716		0.530767	0.329505	0.298805		0.20703	0.231655	0.345559		0.516056	0.295208	0.523152
0.628712	0.217275	0.710469		0.716794	0.288954	0.361067		0.54521	0.241354	0.280558		0.526732	0.285357	0.379282		0.0559341	0.265938	0.293586		0.474281	0.374291	0.522906
0.598937	0.216432	0.704721		0.675467	0.363213	0.286509		0.587497	0.241174	0.260752		0.523624	0.229325	0.365637		0.602753	0.116709	0.306599		0.463346	0.192125	0.515304
0.264225	0.215647	0.702183		0.444583	0.0994087	0.134758		0.508644	0.240563	0.576595		0.521291	0.127391	0.381398		0.624057	0.0173704	0.306599		0.473622	0.302433	0.529252
0.647098	0.214176	0.728282		0.469016	0.254932	0.39831		0.277864	0.240192	0.613804		0.517584	0.18904	0.257871		0.569269	0.392703	0.231766		0.275137	0.319928	0.527285
0.573334	0.213978	0.694417		0.441614	0.110573	0.384617		0.237684	0.239404	0.508366		0.510079	0.234697	0.778889		0.287961	0.304101	0.242412		0.289572	0.328378	0.639969
0.553328	0.212463	0.730637		0.608225	0.153963	0.302261		0.560972	0.238979	0.198632		0.502613	0.363527	0.788938		0.260346	0.392776	0.274229		0.292034	0.204698	0.666802
0.646503	0.212463	0.64406		0.438517	0.216419	0.393958		0.534558	0.235538	0.234441		0.501931	0.417508	0.742562		0.300093	0.321129	0.262875		0.318857	0.320728	0.664085
0.533904	0.207301	0.667475		0.56636	0.357431	0.279476		0.317621	0.23538	0.554902		0.499539	0.210178	0.65314		0.334928	0.308141	0.35019		0.285926	0.310841	0.663814
0.42245	0.204346	0.657681		0.50259	0.337034	0.379214		0.313683	0.234215	0.523022		0.49687	0.406472	0.285873		0.388945	0.273145	0.301956		0.379754	0.339975	0.653319
0.487095	0.203545	0.674902		0.604978	0.285024	0.379214		0.571011	0.227152	0.302416		0.493269	0.396733	0.635005		0.334262	0.204503	0.239807		0.373943	0.318208	0.702185
0.605869	0.19815	0.669691		0.613596	0.365202	0.289712		0.547402	0.224062	0.662403		0.488447	0.361924	0.500932		0.371919	0.116027	0.285512		0.28527	0.273555	0.604346
0.630137	0.19774	0.696024		0.219898	0.17268	0.705407		0.434433	0.22405	0.624795		0.485885	0.336405	0.192155		0.387385	0.180156	0.665665		0.558274	0.341418	0.625839
0.581831	0.196554	0.649272		0.328041	0.190186	0.705407		0.378763	0.223608	0.567197		0.482633	0.300929	0.677288		0.334742	0.129745	0.71784		0.628916	0.179996	0.667966
0.136036	0.195204	0.704789		0.647634	0.228002	0.705407		0.277364	0.223057	0.644017		0.479718	0.235962	0.679825		0.634531	0.429376	0.683183		0.605178	0.190076	0.664819
0.1513	0.192427	0.705168		0.352637	0.187086	0.693726		0.609646	0.220619	0.633857		0.477366	0.287938	0.660249		0.458396	0.349525	0.718069		0.593533	0.17713	0.608361
0.217381	0.182345	0.699029		0.548463	0.322071	0.70579		0.586561	0.217859	0.313565		0.476499	0.284971	0.649786		0.663978	0.427262	0.716766		0.570269	0.213805	0.589206
0.147563	0.180284	0.705965		0.455324	0.257114	0.716763		0.446739	0.217859	0.62308		0.474963	0.3285	0.652256		0.629611	0.366485	0.683311		0.608332	0.201743	0.589859
0.732189	0.179916	0.705965		0.733919	0.249915	0.754123		0.386857	0.217859	0.183881		0.473871	0.27361	0.654329		0.660061	0.354493	0.717955		0.462735	0.189122	0.600117
0.699568	0.179916	0.666098		0.696296	0.284352	0.748629		0.497303	0.215869	0.18321		0.473633	0.35457	0.649359		0.462274	0.322925	0.718069		0.407575	0.209437	0.642413
0.599053	0.174492	0.67329		0.338809	0.303865	0.731201		0.468919	0.212867	0.261325		0.471993	0.493728	0.635165		0.436494	0.265329	0.679912		0.412378	0.164244	0.614232
0.194358	0.174207	0.666424		0.592221	0.336127	0.731538		0.453632	0.21011	0.268729		0.469625	0.392528	0.646734		0.431713	0.190682	0.718409		0.196756	0.103298	0.61118
0.400527	0.17114	0.666098		0.363053	0.294869	0.74054		0.37134	0.202763	0.567673		0.467864	0.324762	0.631218		0.209916	0.245291	0.693695		0.360999	0.215655	0.597377
0.624139	0.170574	0.673601		0.498793	0.403361	0.737052		0.0514703	0.194544	0.605862		0.462259	0.112576	0.606975		0.204025	0.386384	0.723129		0.388895	0.0295483	0.592884
0.551241	0.168622	0.652816		0.404711	0.225265	0.715423		0.550892	0.19373	0.497565		0.462027	0.138343	0.256339		0.302256	0.313898	0.60948		0.423395	0.180833	0.616436
0.525251	0.163614	0.648757		0.691995	0.345111	0.67918		0.536719	0.192113	0.215654		0.460996	0.415183	0.256339		0.368427	0.386865	0.60948		0.403388	0.24301	0.60512
0.623639	0.163614	0.645721		0.649361	0.250226	0.71476		0.564159	0.188937	0.24999		0.458649	0.363371	0.34467		0.361274	0.313509	0.664688		0.435499	0.255466	0.608409
0.511204	0.158447	0.679422		0.614296	0.0433899	0.726548		0.549453	0.188929	0.545694		0.457283	0.273859	0.345041		0.410476	0.300395	0.584428		0.389282	0.244902	0.629156
0.420899	0.158149	0.636856		0.1819	0.274756	0.724282		0.259434	0.188496	0.517992		0.456699	0.348936	0.360236		0.353567	0.283388	0.626736		0.531935	0.244661	0.623029
0.447876	0.157789	0.68033		0.543334	0.399603	0.71026			0.18706	0.309727		0.455001	0.330954	0.236184		0.323115	0.215888	0.624634		0.58187	0.222523	0.622686
0.583043	0.153595	0.586602		0.458991	0.373141	0.667805			0.18706	0.671626		0.452839	0.317365	0.740381		0.648802	0.128542	0.679144		0.562626	0.230923	0.602144
0.601171	0.152884	0.605972		0.71359	0.335313	0.692409			0.18706	0.634014		0.448783	0.265152	0.747601		0.460936	0.169557	0.665606		0.548958	0.266364	0.666044
0.178188	0.145938	0.601753		0.672084	0.405034	0.692409			0.184017	0.574228		0.444804	0.223315	0.697879		0.664621	0.26694	0.691403		0.53705	0.190463	0.553032
0.244196	0.145385	0.611793		0.583633	0.253483	0.667837			0.184003	0.66016		0.439598	0.450936	0.673618		0.630916	0.191643	0.68114		0.562603	0.251042	0.571398
0.0150766	0.141283	0.608031		0.550942	0.38419	0.684415			0.176362	0.648784		0.439059	0.392737	0.378671		0.677519	0.119306	0.670834		0.494046	0.275496	0.632004
0.750143	0.139556	0.645889		0.588185	0.351812	0.684415			0.164398	0.28495		0.437494	0.338319	0.652978		0.502166	0.129731	0.729802		0.409257	0.265498	0.624649
0.719131	0.139556	0.582904		0.371977	0.310271	0.684415			0.164374	0.631519		0.437271	0.300285	0.643643		0.445397	0.405775	0.738713		0.447666	0.248851	0.55809
0.630833	0.135278	0.646416		0.24808	0.384629	0.663157			0.162493	0.201527		0.436818	0.388858	0.232542		0.475412	0.350411	0.730014		0.271704	0.227287	0.542834
0.250063	0.135083	0.646943		0.563074	0.171211	0.684881			0.160618	0.200848		0.436644	0.348147	0.699797		0.269715	0.30908	0.728805		0.402298	0.239608	0.544156
0.451042	0.133808	0.639987		0.46754	0.305992	0.696953			0.156295	0.278062		0.433513	0.327864	0.712058		0.30893	0.327379	0.738812		0.371482	0.270164	0.561386
0.0803198	0.133808	0.648047		0.6934	0.227304	0.737026			0.152351	0.25995		0.433263	0.357231	0.729193		0.319977	0.286325	0.729909		0.368805	0.159071	0.602614
0.165608	0.131002	0.648047		0.648026	0.311846	0.730623			0.148806	0.573032		0.432792	0.326798	0.682834		0.343792	0.238618	0.730014		0.368608	0.288196	0.56694
0.705403	0.127646	0.689401		0.291069	0.283649	0.712207			0.147153	0.612398		0.428781	0.162166	0.684578		0.378195	0.225621	0.692936		0.383646	0.277982	0.563056
0.669213	0.125858	0.695633		0.543684	0.182109	0.712509			0.141869	0.504318		0.427653	0.315551	0.685767		0.362483	0.181902	0.730382		0.623698	0.208922	0.557248
0.564225	0.123236	0.689682		0.480019	0.271733	0.669696			0.137932	0.176422		0.427566	0.37228	0.667254		0.315546	0.284003	0.706272		0.685623	0.188989	0.542816
0.158799	0.114994	0.689401		0.584649	0.160896	0.71824			0.135787	0.214033		0.425587	0.2563	0.656816		0.68174	0.219926	0.734951		0.66344	0.217127	0.567829
0.36696	0.112026	0.695903		0.529279	0.0507134	0.695312			0.129961	0.551563		0.423859	0.211177	0.662735		0.474926	0.265378	0.624802		0.654541	0.23644	0.557906
0.232627	0.110547	0.67849		0.170955	0.143348	0.657166			0.122489	0.52315		0.423562	0.214531	0.6346		0.692146	0.181249	0.624802		0.636228	0.291386	0.695359
0.678493	0.107766	0.674312			0.336577	0.694674			0.115153	0.365931		0.422492	0.304564	0.686507		0.661451	0.1686	0.677625		0.668271	0.281285	0.71479
0.644478	0.104343	0.672007			0.336575	0.707214			0.109018	0.712534		0.4221	0.335493	0.189274		0.704326	0.418867	0.644423		0.436612	0.330092	0.712617
0.530846	0.103122	0.701156			0.366753	0.696276			0.104634	0.667105		0.421818	0.392509	0.189274		0.460248	0.368495	0.641666		0.407416	0.299779	0.712431
0.221606	0.100543	0.662579			0.32914	0.681097			0.0957979	0.599405		0.421135	0.313184	0.220857		0.447361	0.331278	0.639405		0.415757	0.252705	0.727581
0.321842	0.100543	0.702267			0.255572	0.644052			0.0651877	0.693707		0.419329	0.373616	0.22815		0.486322	0.35299	0.69169		0.263804	0.32301	0.743651
0.749485	0.0973692	0.61744			0.306607	0.669826			0.0634359	0.692028		0.418677	0.411122	0.241595		0.291616	0.0150653	0.679123		0.249651	0.0167237	0.666366
0.718482	0.0959671	0.635633			0.245807	0.669826			0.0623341	0.3051		0.415514	0.205508	0.243323		0.377125	0.349429	0.704163		0.303191	0.334256	0.705092
0.633123	0.094149	0.631728			0.210951	0.643538			0.055486	0.66894		0.414507	0.22614	0.761848		0.353826	0.283942	0.694184		0.304711	0.303722	0.714182
0.259052	0.0941308	0.641022			0.220384	0.704024			0.0541035	0.292825		0.413614	0.167323	0.773958		0.40806	0.234466	0.701838		0.233274	0.256205	0.71268
0.455718	0.0938852	0.635972			0.288954	0.704023			0.0485898	0.293322		0.412188	0.248787	0.726862		0.335766	0.258101	0.754795		0.54846	0.250677	0.66917
0.318271	0.0924701	0.672583			0.285024	0.704024			0.0338958	0.362852		0.409609	0.385433	0.685702		0.312289	0.338286	0.760069		0.608516	0.325206	0.652117
0.421796	0.0924701	0.613932			0.249915	0.692172			0.0335373	0.362885		0.407681	0.448728	0.4102		0.629288	0.271736	0.754967		0.650923	0.293786	0.652074
0.693994	0.092242	0.673071			0.345111	0.704415			0.0246065	0.637291		0.406051	0.341806	0.664858		0.448341	0.221463	0.753986		0.639705	0.244878	0.660995
0.628426	0.0891498	0.673522			0.335313	0.715577			0.0101793	0.655652		0.405868	0.327034	0.654228		0.647219	0.243896	0.760151		0.629201	0.23987	0.694133
0.372864	0.0878718	0.667017			0.310271	0.755586			0.00200894	0.588303		0.405828	0.240675	0.27294		0.611927	0.15113	0.754881		0.6501	0.0563367	0.673007
0.65629	0.0866103	0.674467			0.227304	0.74791			0.00200894	0.247788		0.40542	0.1266	0.710871		0.660399	0.1796	0.754967		0.554199	0.123318	0.670922
0.621526	0.0862809	0.674467			0.18211	0.730225			0.00200894	0.284006		0.405061	0.246972	0.716388		0.498018	0.148972	0.721577		0.499826	0.112169	0.649906
0.535552	0.0858222	0.698394			0.160896	0.730565			0	0.579942		0.404893	0.199932	0.739043		0.428714	0.0998184	0.755368		0.477166	0.0756396	0.656126
0.503883	0.0850733	0.704522			0.143349	0.739732				0.557204		0.403737	0.336866	0.687931		0.490608	0.0658917	0.733478		0.357803	0.0618281	0.675469
0.324353	0.0850733	0.698671				0.736155				0.372829		0.396799	0.242284	0.689645		0.412551	0.0711975	0.759447		0.261713	0.133534	0.665028
	0.0843662	0.698394				0.714205				0.71429		0.396793		0.696066		0.36128		0.660919		0.258647		0.635185
	0.0843662	0.704788				0.677451				0.671898		0.395088		0.67797		0.362878		0.660919		0.219741		0.643222
	0.0811019	0.669044				0.713536				0.59984		0.39204		0.668583		0.372939		0.706746		0.564426		0.646109
	0.0809333	0.673187				0.7255				0.694763		0.391695		0.672868		0.358453		0.674476		0.63166		0.645807
	0.0791656	0.67835				0.723204				0.69666		0.391007		0.638759		0.632495		0.67584		0.669368		0.633439
	0.0780189	0.702191				0.708966				0.310819		0.390614		0.697909		0.409861		0.673728		0.65896		0.680683
	0.0735661	0.649773				0.66587				0.670532		0.388674		0.211155		0.653902		0.71947		0.633721		0.647253
	0.0735661	0.692198				0.690814				0.300183		0.387565		0.211155		0.618741		0.709312		0.669532		0.663976
	0.073014	0.622334				0.690814				0.300679		0.387191		0.26047		0.663381		0.731809		0.538412		0.703105
	0.066414	0.640866				0.665874				0.369878		0.38657		0.248245		0.44059		0.722809		0.490355		0.693322
	0.0646337	0.630101				0.644599				0.35443		0.384348		0.226485		0.470885		0.652306		0.455659		0.650747
	0.0646336	0.629995				0.644599				0.643171		0.383628		0.264964		0.439153		0.71449		0.340943		0.614607
	0.0645335	0.628655				0.644599				0.65701		0.381586		0.765828		0.207392		0.724421		0.311895		0.620588
	0.0613502	0.678419				0.630971				0.588773		0.38146		0.778569		0.254454		0.714727		0.272328		0.633134
	0.0604557	0.600887				0.645247				0.232297		0.37844		0.734498		0.260045		0.713377		0.562862		0.675918
	0.0530865	0.662962				0.659576				0.269985		0.376861		0.629593		0.197656		0.724531		0.632699		0.64753
	0.0505853	0.663439				0.707563				0.580235		0.375604		0.308814		0.656373		0.714609		0.670352		0.644679
	0.0505853	0.66347				0.69669				0.562286		0.37118		0.609738		0.43636		0.714727		0.659986		0.625592
	0.0505853	0.661102				0.676389				0.360914		0.369794		0.597985		0.668244		0.676429		0.634838		0.630133
	0.048544	0.661102				0.676603				0.711391		0.361538		0.146256		0.675111		0.715064		0.670565		0.653364
	0.048544	0.392619				0.628262				0.665726		0.361475		0.659414		0.676027		0.689808		0.576154		0.641752
	0.0484399	0.351354				0.682716				0.600217		0.359985		0.667739		0.520718		0.719898		0.475311		0.644096
	0.0472779	0.393727				0.657283				0.692393		0.356863		0.693241		0.492495		0.603797		0.477121		0.663785
	0.0472779	0.392619				0.61556				0.690819		0.353179		0.643497		0.523793		0.603797		0.335063		0.666508
	0.0444757	0.352537				0.694555				0.299014		0.352512		0.63724		0.215739		0.660303		0.349717		0.666239
	0.0397645	0.193024				0.708253				0.667532		0.344881		0.641466		0.243097		0.625541		0.582773		0.655873
	0.0390669	0.21255				0.668279				0.287493		0.344138		0.627187		0.159504		0.621407		0.647397		0.699222
	0.038504	0.222942				0.651205				0.287997		0.341517		0.613985		0.611998		0.61908		0.682051		0.667524
	0.0370533	0.337966				0.599852				0.358526		0.339552		0.624851		0.43705		0.675784		0.672185		0.679643
	0.0344681	0.316146				0.627776				0.358496		0.335041		0.59631		0.646516		0.662099		0.645555		0.718926
	0.0314258	0.322466				0.627776				0.638037		0.334568		0.650534		0.654974		0.687425		0.682829		0.710138
	0.0260794	0.340159				0.598694				0.656417		0.333797		0.0632248		0.635886		0.676928		0.555162		0.670657
	0.0208055	0.281707				0.676084				0.589036		0.332539		0.0632248		0.525717		0.645816		0.504297		0.636009
	0.0208055	0.126781				0.676083				0.241456		0.329387		0.184752		0.49706		0.71752		0.480321		0.641349
	0.0133741	0.24996				0.676084				0.278272		0.327713		0.163492		0.49896		0.727319		0.372212		0.654361
	0.0133741	0.361757				0.663405				0.577762		0.323227		0.184841		0.312304		0.717754		0.531317		0.693461
	0.00791252	0.241035				0.676588				0.557883		0.322346		0.183243		0.219759		0.716422		0.591185		0.667212
	0.00791252	0.312844				0.683036				0.348144		0.31973		0.740183		0.648879		0.727428		0.635487		0.664672
	0.00551198	0.194543				0.72534				0.696037		0.319389		0.75114		0.439951		0.717638		0.623653		0.648693
	0.00225467	0.197099				0.718335				0.654054		0.317785		0.705638		0.624345		0.717754		0.628853		0.650923
	0.00225467	0.204886				0.699411				0.585053		0.311541		0.592657		0.633214		0.679537		0.633765		0.673008
	0.00214546	0.192377				0.699682				0.68013		0.308423		0.282919		0.669163		0.7181		0.537503		0.661457
		0.192377				0.710769				0.679602		0.30784		0.580723		0.498476		0.692875		0.491295		0.64512
		0.692378				0.704803				0.328154		0.306118		0.56243		0.493531		0.72292		0.487864		0.664876
		0.672068				0.681183				0.655542		0.305443		0.325967		0.497712		0.604033		0.295216		0.667413
		0.692654				0.647404				0.277721		0.303242		0.624155		0.237058		0.604033		0.170131		0.667146
		0.692378				0.667592				0.278225		0.30089		0.58395		0.59285		0.663322		0.365425		0.657058
		0.672362				0.681355				0.348706		0.297802		0.610673		0.417358		0.628616		0.399375		0.700205
		0.649714				0.691871				0.366923		0.293748		0.534682		0.611195		0.621635		0.327118		0.668423
		0.646391				0.729822				0.625601		0.291498		0.5375		0.627326		0.622362		0.338764		0.680516
		0.643033				0.682166				0.645826		0.290876		0.543405		0.624763		0.678768		0.538439		0.719612
		0.678269				0.717903				0.576826		0.290876		0.596547		0.535547		0.66526		0.579588		0.711033
		0.632901				0.717903				0.259503		0.289942		0.585026		0.440117		0.690527		0.559095		0.67154
		0.675398				0.689697				0.294307		0.288139		0.595911		0.497666		0.680051		0.547671		0.636973
		0.587209				0.623541				0.564822		0.284534		0.566518		0.630619		0.672997		0.309804		0.642282
		0.605433				0.623541				0.545352		0.283053		0.614833		0.420096		0.72579		0.348961		0.655276
		0.601464				0.623541				0.330467		0.268905		0.25805		0.642225		0.732489		0.312919		0.694396
		0.610908				0.619545				0.727481		0.264862		0.25805		0.6506		0.726002		0.224526		0.668258
		0.607405				0.624258				0.685344		0.264122		0.235496		0.65267		0.729914		0.610681		0.665734
		0.642977				0.632091				0.617361		0.261304		0.218175		0.531602		0.732589		0.637375		0.649612
		0.582346				0.679143				0.690835		0.257066		0.236122		0.477394		0.725897		0.626327		0.651853
		0.643473				0.66981				0.682352		0.253113		0.337473		0.50831		0.726002		0.619895		0.673878
		0.644406				0.649626				0.396058		0.250236		0.669887		0.476319		0.676823		0.0596939		0.662505
		0.634505				0.649747				0.678041		0.24673		0.677273		0.25068		0.726353		0.123625		0.665147
		0.641457				0.663885				0.29575		0.245805		0.625818		0.313962		0.690152		0.130035		0.682958
		0.641457				0.654868				0.296212		0.245436		0.68126		0.180043		0.730867		0.551003		0.680415
		0.449701				0.629441				0.283243		0.245273		0.4		0.617466		0.679733		0.589549		0.680168
		0.408809				0.593726				0.32594		0.242308		0.660404		0.639757		0.679733		0.602114		0.67107
		0.450719				0.614167				0.630283		0.240047		0.649635		0.584723		0.673416		0.596216		0.711852
		0.449701				0.629178				0.680015		0.239876		0.258888		0.530449		0.696167		0.17666		0.681348
		0.409902				0.650433				0.59219		0.213961		0.706901		0.554098		0.69679		0.177226		0.692551
		0.28643				0.693288				0.301713		0.210179		0.710737		0.542809		0.694503		0.561308		0.729796
		0.30199				0.63259				0.331044		0.20796		0.735613		0.481161		0.686843		0.598116		0.728276
		0.289833				0.670889				0.598699		0.200902		0.680932		0.50539		0.680481		0.610534		0.684247
		0.395288				0.670889				0.586551		0.197507		0.682708		0.451992		0.698951		0.584194		0.655732
		0.374963				0.639654				0.375701		0.197507		0.691789		0.0912768		0.689096		0.134179		0.660563
		0.380814				0.677204				0.72345		0.197265		0.673433		0.171176		0.639483		0.532151		0.666672
		0.360521				0.677203				0.678507		0.197265		0.664186		0.617269		0.689409		0.568762		0.705496
		0.319157				0.677204				0.607171		0.197248		0.668556		0.617051		0.698247		0.572283		0.680673
		0.170137				0.665276				0.693083		0.176459		0.640781		0.586279		0.689682		0.575199		0.678335
		0.311131				0.677674				0.684667		0.176459		0.693769		0.231299		0.694104		0.553251		0.664455
		0.415286				0.6895				0.306982		0.168298		0.186712		0.579518		0.698374		0.593301		0.664098
		0.260174				0.730615				0.675205		0.168298		0.186712		0.5811		0.689546		0.605388		0.686424
		0.369781				0.721991				0.333502		0.121732		0.246607		0.546222		0.689682		0.598998		0.673947
		0.259306				0.704228				0.333965		0.121732		0.226424		0.612309		0.633805		0.312163		0.618522
		0.254774				0.704496				0.398731		0.07725		0.247487		0.631773		0.68995		0.372887		0.625923
		0.271478				0.714737				0.399286		0.0412938		0.269126		0.579741		0.649016		0.447104		0.628926
		0.259829				0.709985				0.652222		0.026108		0.767116		0.310431		0.695088		0.321147		0.628596
		0.259829				0.686836				0.678503		0.0241744		0.779525		0.196071		0.639055		0.396356		0.61452
		0.417033				0.623262				0.616488				0.735959		0.300703		0.639055		0.425462		0.664792
		0.379164				0.687239				0.278631				0.642959				0.632337				0.630175
		0.418033				0.699377				0.313177				0.335045				0.660181				0.664573
		0.417033				0.69683				0.585133				0.622941				0.657916				0.68949
		0.380228				0.727618				0.573163				0.6115				0.656082				0.678892
		0.261873				0.680825				0.380409				0.29708				0.647334				0.633959
		0.277091				0.713501				0.708949				0.671571				0.638394				0.596875
		0.265088				0.713501				0.670369				0.680846				0.658976				0.603374
		0.366612				0.681048				0.594953				0.70396				0.647917				0.616779
		0.267949				0.217975				0.689584				0.65106				0.673994				0.661025
		0.372963				0.217973				0.702089				0.65303				0.719446				0.634503
		0.263494				0.217975				0.307978				0.65443				0.726471				0.631437
		0.29357				0.253739				0.679572				0.640678				0.719668				0.611105
		0.174749				0.210496				0.344501				0.627048				0.723653				0.612783
		0.285928				0.29359				0.34496				0.637621				0.726576				0.636792
		0.386247				0.35322				0.40922				0.610263				0.719557				0.625265
		0.256028				0.301891				0.409934				0.66302				0.719668				0.297331
		0.236709				0.268877				0.659541				0.241621				0.669516				0.378383
		0.236937				0.277488				0.661461				0.241621				0.720005				0.358808
		0.23279				0.335621				0.594202				0.305972				0.683119				0.357904
		0.248502				0.335548				0.245418				0.295609				0.724609				0.374543
		0.237538				0.287583				0.281534				0.292674				0.672324				0.431372
		0.237538				0.133272				0.568719				0.326713				0.672324				0.348177
		0.437032				0.377731				0.568797				0.740983				0.609772				0.458278
		0.401253				0.356339				0.331844				0.752424				0.689928				0.486826
		0.437943				0.310816				0.686514				0.706431				0.689643				0.476442
		0.437032				0.407208				0.647115				0.654835				0.687885				0.358541
		0.402222				0.263143				0.554182				0.35444				0.623822				0.372842
		0.319944				0.32543				0.660602				0.634513				0.673313				0.377757
		0.294115				0.32543				0.670713				0.625017				0.692086				0.387387
		0.283376				0.236576				0.245431				0.322991				0.682057				0.446973
		0.391965				0.64619				0.645356				0.682061				0.617941				0.404467
		0.319501				0.646189				0.28388				0.688451				0.679844				0.396787
		0.414416				0.64619				0.284387				0.714357				0.689413				0.38771
		0.294445				0.633469				0.355331				0.656324				0.680139				0.372324
		0.309254				0.646789				0.355253				0.658233				0.678461				0.360164
		0.21716				0.660139				0.626217				0.669061				0.68955				0.406471
		0.339165				0.704982				0.639982				0.650265				0.679992				0.246626
		0.347685				0.694754				0.568317				0.64109				0.680139				0.284973
		0.274848				0.675832				0.170708				0.647135				0.63808				0.260465
		0.292556				0.67603				0.211057				0.618299				0.680383				0.259246
		0.297421				0.688146				0.525017				0.670258				0.652948				0.270227
		0.29364				0.681724				0.528888				0.256352				0.685757				0.330832
		0.28264				0.656904				0.38211				0.256352				0.622254				0.246231
		0.297667				0.588259				0.686414				0.185478				0.622254				0.390752
		0.297667				0.655281				0.653082				0.164356				0.620888				0.408314
		0.445741				0.668364				0.587996				0.185575				0.6448				0.392802
		0.405041				0.667911				0.664112				0.32763				0.641836				0.245179
		0.446762				0.707252				0.67878				0.736863				0.639512				0.312641
		0.445741				0.644561				0.358841				0.747654				0.637286				0.319415
		0.406136				0.691714				0.650135				0.698603				0.620135				0.330269
		0.282567				0.691714				0.172489				0.640643				0.648047				0.361547
		0.298209				0.656801				0.173064				0.300655				0.636525				0.31204
		0.28597				0.605283				0.253565				0.622855				0.648068				0.301725
		0.391579				0.605285				0.242049				0.544006				0.704649				0.331029
		0.381911				0.605283				0.570845				0.405268				0.712549				0.295122
		0.387633				0.613221				0.609806				0.665964				0.704896				0.247073
		0.356794				0.606104				0.499569				0.615826				0.7091				0.337594
		0.315404				0.629968				0.198155				0.632575				0.712665				0.393971
		0.166907				0.667742				0.150449				0.571081				0.704773				0.36957
		0.307376				0.660217				0.559894				0.573418				0.704896				0.376415
		0.411634				0.621873				0.540717				0.576056				0.652642				0.375572
		0.256429				0.622536				0.313632				0.621615				0.705202				0.375003
		0.366064				0.645563				0.682856				0.614018				0.666285				0.430651
		0.255561				0.653157				0.651376				0.619085				0.710073				0.231416
		0.251052				0.612223				0.564417				0.59211				0.656437				0.377213
		0.267748				0.532909				0.661205				0.58132				0.656437				0.380827
		0.256104				0.62607				0.674791				0.378682				0.649532				0.359923
		0.256104				0.633591				0.245057				0.378682				0.675169				0.243866
		0.75728				0.641545				0.646283				0.251054				0.674538				0.175567
		0.743082				0.623392				0.272266				0.270992				0.672148				0.184744
		0.757432				0.53916				0.272789				0.280876				0.664584				0.244328
		0.75728				0.597181				0.345763				0.410333				0.65606				0.283625
		0.743244				0.597181				0.329492				0.651123				0.67575				0.22896
		0.773659				0.543079				0.629431				0.657322				0.665201				0.21825
		0.765255				0.64238				0.638156				0.596255				0.250678				0.307286
		0.763872				0.642379				0.564915				0.677063				0.294127				0.277343
		0.74176				0.64238				0.143663				0.359862				0.34619				0.285578
		0.721515				0.629192				0.186234				0.658586				0.29542				0.22725
		0.745081				0.643605				0.535975				0.53453				0.288018				0.38852
		0.714782				0.657518				0.537071				0.35686				0.346743				0.353794
		0.739178				0.699235				0.326169				0.699905				0.294777				0.371003
		0.736579				0.693407				0.723597				0.666368				0.29542				0.370145
		0.748154				0.673784				0.680852				0.64122				0.379162				0.358118
		0.731795				0.672252				0.671749				0.631407				0.304188				0.425657
		0.759939				0.689881				0.691949				0.633327				0.350414				0.224167
		0.719609				0.678138				0.70901				0.635114				0.315203				0.37166
		0.769615				0.640098				0.304129				0.668972				0.260507				0.375744
		0.770087				0.568602				0.685871				0.659751				0.260507				0.354439
		0.763559				0.654732				0.441103				0.664203				0.219255				0.23684
		0.768143				0.668289				0.440387				0.643277				0.308735				0.147376
		0.768143				0.671074				0.497372				0.628006				0.247435				0.157296
		0.767897				0.654614				0.498439				0.432448				0.235755				0.243737
		0.752785				0.582727				0.727842				0.432448				0.341971				0.283255
		0.768055				0.63513				0.734851				0.376817				0.276747				0.221962
		0.767897				0.63513				0.682289				0.383463				0.22759				0.211056
		0.752953				0.586729				0.396514				0.381111				0.274844				0.301489
		0.746387				0.460402				0.42643				0.36056				0.559287				0.271013
		0.742213				0.460401				0.653086				0.712243				0.626299				0.279136
		0.740301				0.460402				0.632388				0.723394				0.641416				0.220415
		0.746574				0.480472								0.66693				0.626662				0.35041
		0.717398				0.454374								0.628498				0.624594				0.37231
		0.749865				0.387161								0.293706				0.641583				0.379121
		0.68538				0.428717								0.609578				0.626482				0.378286
		0.712754				0.400692								0.605336				0.626662				0.37792
		0.704629				0.369571								0.253098				0.587674				0.433148
		0.717763				0.377209								0.657915				0.631466				0.235037
		0.70092				0.284982								0.656656				0.59861				0.321243
		0.73587				0.427228								0.679542				0.637145				0.38337
		0.689777				0.356045								0.613381				0.567072				0.362666
		0.741834				0.380084								0.616324				0.567072				0.247376
		0.741804				0.458451								0.624926				0.555454				0.174335
		0.739552				0.441999								0.606863				0.587489				0.183519
		0.739622				0.399527								0.599321				0.574733				0.247689
		0.739622				0.366612								0.606749				0.568087				0.286726
		0.676087				0.296955								0.574002				0.579764				0.302252
		0.683				0.264406								0.629853				0.557114				0.292991
		0.6764				0.264406								0.179747				0.587754				0.310187
		0.676087				0.273916								0.179747				0.575744				0.280507
		0.683299				0.342143								0.127304				0.291145				0.288798
		0.666329				0.342142								0.104759				0.382088				0.303199
		0.655852				0.342143								0.107533				0.409756				0.328594
		0.649491				0.369931								0.265777				0.381782				0.302254
		0.682699				0.335586								0.711506				0.376198				0.310034
		0.633862				0.365486								0.716599				0.410193				0.308987
		0.69034				0.406651								0.669462				0.381296				0.302723
		0.576017				0.376492								0.655973				0.381782				0.357136
		0.61559				0.345117								0.253443				0.443284				0.139027
		0.611456				0.35293								0.637393				0.389397				0.297904
		0.630682				0.412554								0.505954				0.423779				0.307618
		0.620542				0.404463								0.320978				0.397971				0.280431
		0.648062				0.331465								0.681307				0.378353				0.140381
		0.591479				0.245935								0.694277				0.378353				0.146352
		0.664769				0.437993								0.669334				0.178927				0.156948
		0.665261				0.420507								0.663954				0.313512				0.183758
		0.654895				0.389711								0.666281				0.345505				0.200196
		0.662173				0.356174								0.666993				0.33533				0.230689
		0.662173				0.144234								0.646865				0.291055				0.2192
		0.447492				0.251408								0.63811				0.36786				0.278518
		0.409314				0.251408								0.64438				0.33661				0.244275
		0.448424				0.129169								0.620216				0.367903				0.189798
		0.447492												0.604787				0.337685				0.27041
		0.410312												0.403415				0.424699				0.654553
		0.299709												0.403415				0.44798				0.65709
		0.313208												0.368336				0.42325				0.650054
		0.302705												0.375149				0.431474				0.650293
		0.396976												0.384434				0.447296				0.66172
		0.297206												0.347517				0.423972				0.686184
		0.399013												0.728695				0.42325				0.598503
		0.261956												0.740112				0.476674				0.640142
		0.350755												0.685344				0.43141				0.643638
		0.214953												0.724613				0.45945				0.642477
		0.343944												0.40822				0.438899				0.59518
		0.433715												0.70466				0.310551				0.542689
		0.301103												0.580535				0.310551				0.529535
		0.290234												0.324826				0.237866				0.585166
		0.30038												0.745067				0.25483				0.602081
		0.302375												0.743894				0.289749				0.603725
		0.307818												0.729426				0.279812				0.600766
		0.296369												0.723975				0.337893				0.616852
		0.296369												0.725916				0.420207				0.613128
		0.377664												0.734058				0.382338				0.618607
		0.345397												0.71632				0.409722				0.624203
		0.378552												0.704964				0.263371				0.672646
		0.377664												0.709588				0.305604				0.680442
		0.346332												0.690827				0.342273				0.680139
		0.500343												0.672647				0.306817				0.680373
		0.47898												0.3933				0.315268				0.685358
		0.475695												0.3933				0.342809				0.713853
		0.33725												0.44267				0.306214				0.626131
		0.375876												0.430686				0.306817				0.661388
		0.35505												0.445391				0.385927				0.669914
		0.45932												0.356666				0.315191				0.669196
		0.501447												0.786532				0.358615				0.619731
		0.440413												0.776635				0.324713				0.583027
		0.52222												0.750989				0.325315				0.570717
		0.409619												0.672041				0.325315				0.611449
		0.485145												0.27903				0.244958				0.643059
		0.471566												0.653095				0.255821				0.626497
		0.499896												0.522686				0.286369				0.623871
		0.5009												0.274079				0.275322				0.632337
		0.486699												0.696296				0.36085				0.623044
		0.496671												0.707473				0.314939				0.644409
		0.496671												0.684203				0.255702				0.633235
														0.686319				0.299368				0.669693
														0.68849				0.669688				0.676321
														0.683839				0.719873				0.667931
														0.66962				0.724065				0.668162
														0.654862				0.719109				0.687265
														0.665997				0.718376				0.701774
														0.645853				0.723695				0.620187
														0.627158				0.71949				0.650663
														0.358564				0.719109				0.660015
														0.358564				0.68246				0.657017
														0.300544				0.719922				0.613291
														0.307227				0.696121				0.588722
														0.317667				0.723879				0.576506
														0.317887				0.587582				0.617007
														0.749045				0.587582				0.647601
														0.76137				0.659607				0.620707
														0.708598				0.592022				0.61804
														0.683316				0.623871				0.621651
														0.436247				0.62136				0.618211
														0.663878				0.681176				0.638594
														0.60565				0.67019				0.628488
														0.28975				0.694501				0.630984
														0.706686				0.684326				0.658944
														0.69224				0.679801				0.656129
														0.676946				0.734258				0.655846
														0.662542				0.738302				0.64459
														0.664308				0.73445				0.69511
														0.674448				0.733354				0.594569
														0.674919				0.738394				0.631862
														0.665431				0.734355				0.660427
														0.670747				0.73445				0.65702
														0.648499				0.700821				0.598767
														0.692166				0.734803				0.579529
														0.354214				0.712489				0.580308
														0.354214				0.739016				0.590573
														0.303471				0.619103				0.634168
														0.287897				0.619103				0.605045
														0.304814				0.670333				0.601845
														0.294643				0.6128				0.587921
														0.734505				0.642802				0.583091
														0.746552				0.641249				0.607136
														0.697402				0.694534				0.595838
																		0.689008
																		0.710146
																		0.702895
																		0.642297
																		0.695876
																		0.701154
																		0.695585
																		0.694147
																		0.701274
																		0.69546
																		0.695585
																		0.664988
																		0.695857
																		0.670896
																		0.700693
																		0.552451
																		0.552451
																		0.632271
																		0.558666
																		0.591461
																		0.589408
																		0.664302
																		0.642061
																		0.668361
																		0.657932

## Sheet: alpha diversity-QIIME2-Male
	Week3					Week5					Week7
	1PAT	1PATCON	3PAT	3PATCON		1PAT	1PATCON	3PAT	3PATCON		1PAT	1PATCON	3PAT	3PATCON
Sample-1	3.18654	3.36563	3.05512	7.66182		3.22752	5.43459	2.60882	7.53454		3.52249	4.16119	2.69301	7.37586
Sample-2	3.34912	6.63386	3.40388	3.04739		3.22751	6.43612	2.7986	6.28303		3.52249	8.58326	2.69301	7.80994
Sample-3	3.19374	7.13151	3.71696	6.93066		3.22752	6.64842	2.62684	6.71157		3.52958	8.51141	3.0767	7.9331
Sample-4	3.18654	7.68908	3.11356	5.22673		3.41332	4.59502	2.62684	7.71458		3.52249	7.15522	3.0767	7.30294
Sample-5	3.35632	8.4733	3.03147	6.96723		3.2565	4.56538	2.99252	3.35475		3.74013	7.85852	3.0767	5.50587
Sample-6	2.6826	8.38682	3.09259	4.17924		3.35793	4.55552	2.81974	3.3989		3.75573	8.94692	2.69301	6.1282
Sample-7	2.8771	7.68447	3.39668	7.59538		3.12979	4.14648	3.01054	6.74079		3.13838	3.67268	3.0767	8.85384
Sample-8	2.69803	6.6658	3.23191	6.69207		2.82569	9.47734	3.01054	7.46835		4.60838	8.18174	2.69301	4.20561
Sample-9	3.39609	7.21993	3.40389	8.33305		3.12011	8.85822	2.67498	9.16819		4.71485	4.9172	2.69301	9.03998
Sample-10	3.43834	7.01708	3.53471	8.35611		3.08017	9.29864	2.96258	9.3345		4.51581	4.92076	2.69301	5.40325
Sample-11	3.47482	3.14644	3.03772	8.06852		3.42363	7.83362	2.60882	3.5186		3.71977	5.47324	3.75448	7.47949
Sample-12	3.22529	7.28071	3.39668	4.53455		2.92862	8.57055	3.98861	8.92082		3.62824	5.33963	3.61809	8.43904
Sample-13	3.00072	2.83482	3.91871	3.7303		3.24441	7.94518	2.78458	4.12601		3.6819	9.3496	3.90753	6.32807
Sample-14	3.02998	3.44948	3.29661	6.42948		3.90857	9.31447	2.83063	7.7446		3.86943	9.59133	4.12902	8.93407
Sample-15	2.96027	3.75073	3.0581	6.91052		3.2927	3.68126	3.17181	7.63596		4.31792	7.91989	2.75585	6.43867
Sample-16	3.57149	2.87821	3.53669	7.9747		3.14983	8.62382	2.78575	7.89042		3.62439	4.22879	3.02385	5.83106
Sample-17	2.72393	11.0439	3.76704	8.57267		3.2247	7.46181	2.69301	9.64289		3.4857	4.45826	4.23686	6.63801
Sample-18	3.2796	9.82862	5.53147	8.11418		3.31697	8.21223	3.56507	9.14079		3.69232	6.69453	3.02385	8.77725
Sample-19	2.72018	6.68412	3.83353	9.26681		3.7708	4.17732	3.0576	8.09507		4.43826	7.6515	4.01591	8.7914
Sample-20	2.73052	3.42489	3.31474	7.95081		3.25813	4.10294	3.26827	8.66813		3.6344		6.85186	6.77839
Sample-21	2.80364	4.98778				3.25813					2.82569
Sample-22	2.7523	13.6199				3.57957
Sample-23	2.7523

## Sheet: alpha diversity-QIIME2-Female
	Week3					Week5					Week7
	1PAT	1PATCON	3PAT	3PATCON		1PAT	1PATCON	3PAT	3PATCON		1PAT	1PATCON	3PAT	3PATCON
Sample-1	3.12929	7.28596	3.09259	5.67999		3.42396	6.66207	3.23279	6.6049		3.42819	9.05923	2.69301	8.05472
Sample-2	3.07817	4.17356	3.013	6.36968		2.81505	3.92855	2.80172	7.9981		3.84799	4.28292	2.69301	6.74047
Sample-3	2.69447	7.6436	2.84822	7.83711		3.12271	6.19358	2.67498	7.98287		3.82223	8.84853	2.69301	6.22539
Sample-4	2.69803	7.52828	2.99756	5.09348		2.82215	8.00063	3.28916	8.15917		3.815	4.40635	3.11861	6.04137
Sample-5	3.14145	3.35884	3.46881	8.13896		2.7819	4.45873	2.74204	3.16185		3.21514	7.67322	2.90661	4.34577
Sample-6	3.42566	7.95189	2.90377	3.97295		3.12624	6.13044	3.3808	4.13058		3.44386	7.21378	2.70413	5.01974
Sample-7	3.8818	9.02636	3.27929	4.0025		2.81861	3.88663	2.97909	4.16438		3.84971	6.56606	3.36637	4.33208
Sample-8	2.76389	8.97027	3.88579	3.78774		2.82215	8.39333	3.0767	4.0867		3.58878	8.20609	3.36401	4.75438
Sample-9	2.68728	7.26676	6.5158	7.99288		3.24922	8.64337	3.37844	4.21968		4.29209	7.12786	2.97251	4.25128
Sample-10	3.0628	7.3254	3.14934	6.46291		2.78222	9.73519	3.36278	7.90574		4.02383	10.518	2.97251	9.0086
Sample-11	3.82311	7.47049	2.34874	6.21898		3.14983	8.15957	2.67498	7.56285		3.91733	7.64582	2.97015	6.7474
Sample-12	2.67262	7.21695	2.60882	7.38951		2.74557	8.16472	2.68172	6.35319		4.56183	8.16393	3.3303	6.9498
Sample-13	3.01166	7.70964	3.21945	6.88662		3.90625	8.82292	3.18846	6.1187		4.70073	8.1932	3.32674	7.04022
Sample-14		7.82803	2.86247	7.13402		3.90625	7.73636	2.67935	8.12166		4.30186	8.55508	3.24945	7.59117
Sample-15	3.09662	7.21213	2.9678	8.20564		3.90283	8.6571	2.69065	4.39585		4.34131	7.33359	3.3291	9.24603
Sample-16	4.57001	7.76696	3.38422	4.56129		4.36269	7.35586	2.69301	3.88999		4.20247	4.60491	2.73315	4.75645
Sample-17	4.19808	3.05667	3.70563	2.76876		3.63781	8.16917	3.56088	3.73023		4.13219	3.82808	3.74277	4.77437
Sample-18	3.33479	3.05667	4.07646	3.73386		3.69345	3.77568	3.11685	7.90774		4.52613	4.88349	4.15911	4.00766
Sample-19	3.97286	3.54195	3.34709	7.65918		3.73495	7.20989	2.67498	8.48016		4.27115	4.83735	4.79488	8.38457
Sample-20	3.29975	3.44948	3.41648	6.46322		3.32644	4.45345	3.01609	9.14054		3.96798	4.90687	4.73727	9.28383
Sample-21	3.78671	3.4606	4.02303	8.58271		3.06415	4.89319	3.49621	7.91208		4.44497	4.24847	2.69676	8.27255
Sample-22	3.6314	3.44943	3.81321	7.75501		3.18509	4.0482	3.10805				9.0379	2.6944	7.9341
Sample-23		11.3579	8.6121				9.0717	3.18806				9.62006
Sample-24		10.5373					9.56118					9.67958
Sample-25		10.0093					8.33901					7.99779
