# Supplementary material for: Antibiotic-induced acceleration of type 1 diabetes alters maturation of innate intestinal immunity
Source: eLife. 2018 Jul 25;7:e37816. doi: 10.7554/eLife.37816 (PMC6085123; doi:10.7554/eLife.37816)
Supplement: Figure 3—source data 1. [file elife-37816-fig3-data1.xlsx]

## Sheet: SCFAs
Acetic acid			Propionic acid			Butyric acid			Isobutyric acid			Valeric acid			Isovaleric and Methylbutyric acid
control-P23	PAT-P23		control-P23	PAT-P23		control-P23	PAT-P23		control-P23	PAT-P23		control-P23	PAT-P23		control-P23	PAT-P23
356	170		2362	274		1134	15		71	16		57	4		40	9
235	132		536	399		197	137		20	52		11	21		13	37
151	166		946	167		309	15		34	8		20	4		17	7
87	419		179	386		23	79		7	10		4	5		6	8
302	171		1368	229		1096	13		68	9		47	3		43	7
202	309		1073	354		418	30		48	28		23	18		30	28
122			733			492			24			18			12
