# Supplementary material for: Antibiotic-induced acceleration of type 1 diabetes alters maturation of innate intestinal immunity
Source: eLife. 2018 Jul 25;7:e37816. doi: 10.7554/eLife.37816 (PMC6085123; doi:10.7554/eLife.37816)
Supplement: Figure 6—source data 1. [file elife-37816-fig6-data1.xlsx]

## Sheet: NOS2
Day 12 Control	Day 12 1PAT	Day 15 Control	Day 15 PAT	Day 23 Control	Day 23 1PAT	Day 42 Control	Day 42 1PAT
0.0490017	0.0503794	1.94311	0.192558	0.224977	0.0102933	13.6188	0.459307
0.0580716	0.165968	0.307438	0.0633008	7.55718	0.00750906	9.9007	0.698596
0.0574709	0.0498007	0.35561	0.169972	1.2508	0.0314205	0.314805	3.25471
0.0933618	0.119823	0.348292	0.191892	0.0288127	0.00167439	0.00880495	0.015816
0.0624557	0.0603282	0.36815	0.231385	0.0726873	0.0304555	0.0151193	0.0630452
1.97791	0.0946651	1.27312	5.23564	0.0637181	0.006163	0.0121536	0.0198122
7.48487	0.00878329	0.158041	1.69158	0.0411732	0.0345026	0.00705338	0.0162044
0.765236	0.093686	0.754382	0.610629	0.0193416	0.048794	0.0144532	0.01701
0.765236	0.0574709	2.73847	0.0699936	3.68802	0.0119061	0.1113	0.00139795
0.631699	0.0474969	2.68211	0.0846919	0.0288127	0.0348632	0.0363357	0.00190966
0.0367523	0.0963198	0.786417	0.10463	2.72801	0.00523661	0.000627773	2.43265
0.285978	0.0429552	0.284868	0.168798	1.46698	0.0795413	0.0515648	1.99658
2.24852	0.0474969			0.422742	0.0119889	0.018614	0.0666399
0.44257	0.0509059			1.26387	0.00302856	0.448298	0.366664
0.441039	0.0914405			0.0626235	0.271279	0.0126259	0.0554576
0.317313	0.0358714			0.295832	0.0064694	0.00880495	0.281758
1.28252	0.0296459			0.0556624	0.00320124	0.00412191	0.000968158
				0.0183618	0.00211936	0.0097697	0.00276698
				0.691522	0.0144063	0.00468586	0.00018028
				0.018878	0.00226362	0.0303435	0.0582148
					0.00780085	0.0280186	0.023807
					0.00327985	0.0132078	0.00624765
						0.00927479	0.00458943
						0.165802
						0.154698

## Sheet: HIF1a
Day 12 Control	Day 12 1PAT	Day 15 Control	Day 15 PAT
0.0610447	0.0938181	1.28917	0.529037
0.0909369	0.483306	1.75496	1.13795
0.0770004	0.0967905	1.37691	0.395415
0.5571	0.300619	1.08406	1.0363
0.383157	0.366278	0.815886	0.383272
0.810009	0.432571	0.346623	0.769205
1.91987	0.0304167	1.46048	1.33463
1.92654	0.210371	0.518149	0.215602
2.36364	0.104459	1.37691	0.509248
1.64834	0.181874	0.966901	0.987217
1.31131	0.34652	0.653582	2.00895
0.466843	0.340567	0.356368	0.443326
1.52204	0.204619
0.517995	0.162218
0.532558	0.574751
0.905012	0.514417
1.90661	0.545636

## Sheet: CREBBP
Day 12 Control	Day 12 1PAT	Day 15 Control	Day 15 PAT
0.0489403	0.224871	0.717983	0.100043
0.0716528	0.247786	0.0650198	0.141809
0.0469467	0.047602	0.0464565	0.0211532
0.229596	0.326956	0.0619403	0.0439505
0.321339	0.169243	0.0427981	0.360238
2.2535	0.131868	2.07343	0.571182
2.08807	0.0291001	5.49082	0.077322
1.09594	0.15043	1.88821	0.0942099
0.908884	0.0879098	0.497818	0.0544857
1.54453	0.0752152	1.02956	0.108971
0.408149	0.312552	0.0466177	0.107099
1.3033	0.457603	0.0393368	0.0456584
2.05932	0.295692
0.480353	0.199183
1.2589	0.115196
0.388818	0.230393
2.49176	0.134173

## Sheet: STAT1
Day 12 Control	Day 12 1PAT	Day 15 Control	Day 15 PAT	Day 23 Control	Day 23 1PAT
0.0934572	0.486479	1.19862	0.817736	0.577162	1.03315
0.131711	0.607287	0.345408	0.129083	3.7245	0.457565
0.0523905	0.0865964	0.341836	0.246793	1.40157	0.802207
0.946353	0.523206	0.87138	0.365103	0.311445	0.448148
0.426451	0.463439	1.01493	0.510993	0.256503	0.538511
1.0684	0.208115	1.02909	1.74276	0.298758	0.251224
2.89879	0.0507816	2.41391	0.616159	0.398333	0.463952
0.793032	0.580533	1.37209	0.180038	1.38228	0.577162
1.18546	0.2933	0.930691	0.120022	3.32199	0.299795
2.18927	0.31218	1.34852	0.375367	0.688748	2.87198
0.452331	0.0577294	0.309149	0.245939	2.2927	0.0929145
0.70488	1.09844	0.824376	0.381928	1.46616	0.523785
2.71406	0.447652			0.807787	0.120495
0.66455	0.205962			0.847948	0.372948
1.08331	0.478122			0.487018	0.191053
0.372536	0.233331			0.733082	0.756309
1.22302	0.443022			0.205477	0.485333
	0.359846			0.0577934	0.691139
				0.595448	0.369091
				0.145294	1.0154
					0.577162

## Sheet: NFKB1
Day 12 Control	Day 12 1PAT	Day 15 Control	Day 15 PAT	Day 23 Control	Day 23 1PAT
0.084075	0.279868	1.64634	0.37094	0.297788	1.21618
0.114057	0.469052	0.784181	0.248145	3.58596	0.320269
0.0834942	0.0760357	0.401719	0.238864	1.19115	0.314767
0.279868	0.380989	1.34654	0.347301	0.213507	0.299859
0.451507	0.335136	0.378734	0.319582	0.273073	0.591462
1.49259	0.107904	1.12838	2.16484	0.262858	0.178917
2.41633	0.130563	0.77607	0.932553	0.156297	0.610202
1.00544	0.335136	0.611006	0.22834	1.31709	0.785868
1.17513	0.2297	1.56836	0.196726	3.66131	0.296758
2.07458	0.197212	1.328	0.652594	0.796838	2.55329
0.266613	0.0619746	0.929327	0.421691	1.54473	0.0879214
0.587565	0.289738	1.10134	0.496291	3.66131	0.642763
4.61977	0.56168			0.47053	0.165208
0.3226	0.149459			0.931326	0.402583
0.548218	0.165261			0.374324	5.78516
0.214317	0.126116			0.529374	0.118862
1.26385	0.220343			0.164637	0.299859
	0.184644			0.0362056	0.307223
				0.388869	0.589416
				0.142829	0.460846
					1.0086
					0.375623

## Sheet: IRF1
Day 12 Control	Day 12 1PAT	Day 15 Control	Day 15 PAT	Day 23 Control	Day 23 1PAT
0.100834	0.421922	0.595197	0.243125	1.94943	0.963699
0.096726	2.06344	1.05076	0.483451	1.98351	2.86127
0.0370354	0.169581	0.642354	0.235115	0.872396	1.3867
0.996573	0.702246	1.3674	1.06913	0.508055	0.0875744
0.594623	0.917034	0.95029	1.20701	3.28993	0.127331
0.996573	0.742286	0.669632	2.19838	0.236196	0.0759742
1.71125	0.0844972	0.924304	0.50573	1.23804	0.114757
1.82772	0.68068	0.289461	1.36267	0.537023	1.19057
0.820769	1.10194	1.50327	0.865401	0.995198	6.41591
3.37538	0.403334	3.06617	0.631319	1.58343	0.423858
1.67603	0.0130487	0.452641	1.001	0.148451	0.72782
0.253498	1.16477	0.488503	0.538284	0.912601	3.01395
2.24241	0.482984			0.252273	0.431267
0.530361	0.763155			0.38637	0.9406
0.230853	1.129			2.98567	0.312441
0.221449	1.22268			0.319316	0.250287
1.28792	0.592566			1.27726	0.0857722
	0.362248			0.374505	0.0213689
				1.1835	0.390029
				0.537023	0.178829
				0.686844
				1.1794

## Sheet: CALM3
Day 12 1PAT	Day 15 Control	Day 15 PAT	Day 23 Control	Day 23 1PAT
0.834168	0.878411	1.39762	0.575314	3.77747
0.424374	0.890673	0.397208	1.52353	0.987889
0.169977	0.587625	0.220365	0.631748	0.974289
0.625642	0.581547	0.421314	0.197842	0.357849
0.494283	0.718454	0.39174	0.362844	1.53413
0.222737	0.813925	0.764701	0.425556	0.379566
0.343507	0.964577	0.187241	0.256569	0.924933
0.285866	1.0374	0.212122	0.587403	0.427034
0.313907	0.764701	0.176528	5.30525	0.654027
0.215896	3.59993	0.223441	1.2635	1.20783
0.837064	0.670341	0.563688	0.677091	0.0999549
0.636578	0.492422	0.711023	1.01919	0.289658
0.800187			1.73799	0.178305
0.625642			0.810802	0.289658
0.52428			1.52353	2.07401
0.345896			0.439039	0.408221
0.389153			0.293701	0.338545
0.267648			0.112066	0.26196
			1.52882	0.421154
			0.728207	0.360338
				0.58537
				0.398436

## Sheet: RUNX1
control d12	1PAT d12	control d15	1PAT d15	control d23	1PAT d23	control d42	1PAT d42
0.078797	0.261392	1.29239	0.257929	0.263217	0.24474	6.47186	2.40191
0.11779	0.338983	0.512295	0.243172	3.2139	0.129797	6.70009	3.99773
0.0173284	0.0496964	0.419007	0.191451	0.784217	0.30871	2.44389	6.96045
0.208669	0.194695	0.524875	0.306731	0.0787992	0.0658042	0.0304837	0.0793393
0.290032	0.226767	0.588472	0.219919	0.132984	0.0233461	0.0126403	1.42818
1.44321	0.0626859	0.262438	1.10577	0.0862294	0.0402275	0.00954645	0.0235877
2.79778	0.0268169	1.73513	0.266101	0.108768	0.205089	0.0315587	0.207931
1.09755	0.14302	0.395033	0.062502	1.67519	0.0250217	0.0651171	0.0651171
1.89774	0.163718	2.39503	0.116229	6.36131	0.0491837	0.623811	0.55447
2.88643	0.0976852	2.54038	0.194123	0.272499	0.208674	0.0534443	0.0275688
0.119849	0.113384	0.452204	0.291193	1.82681	0.0609734	0.0270014	5.1486
0.138627	0.372235	0.882731	0.389595	3.31573	0.108017	0.179764	8.84082
3.23616	0.225201			0.249018	0.0640048	0.292028	0.625976
0.445743	0.0437154			0.910243	0.102901	2.69294	0.429039
0.370947	0.0930587			0.234771	1.54684	0.15434	0.194681
0.246436	0.0970105			0.16091	0.00694083	4.08173	0.359529
1.60691	0.212316			0.0712644	0.139596	0.028541	0.0889526
	0.11105			0.0196316	0.228351	0.0234248	0.046365
				0.218291	0.49118	0.0140254	0.00718488
				0.0162246	0.0557194	0.0214063	0.28306
					0.105428	0.209378	3.4086
					0.284071	0.127113	0.456656
						0.0422232	0.0357523
						0.466251
						0.197398

## Sheet: FOXP3
control d12	1PAT d12	control d15	1PAT d15	control d23	1PAT d23	control d42	1PAT d42
0.127205	0.219185	0.428054	0.0691496	0.377529	0.596526	7.6296	0.686155
0.115441	0.071062	0.134984	0.0406913	1.29205	0.0905374	2.05852	6.13306
0.122446	0.179272	0.159416	0.176883	0.0827359	0.21986	0.0167651	1.70126
3.30631	0.156607	0	0.428054	0.0288488	0.117412	0.00882987	0.0226649
2.00031	0.0766922	2.21279	0.0597824	0.318565	0.709393	0.0159158	0
0.411859	0.198227	1.15338	0.189578	0.30453	0.148101	0.0332986	0.0484153
1.39496	0.0162347	0.790515	0.449335	0	0.346195	0.0499493	0.0428847
0.269849	0.539698	2.33896	0.0638515	1.58519	0.273509	0.553482	0.118389
0.876741	0.549131	2.61328	0.139261	2.30483	0.524734	0.649143	0.0650011
1.29704	0.0309315	0.446231	0.0525875	2.74091	0.0886742	0.005214	0.0136175
3.51914	0	0.722397	0.0477242	3.13759	1.07524	0.251148	3.62155
0.303596	1.83429		0.141205	3.29358	0	3.58409	6.52785
0.602997	1.42427			0.445858	0.312009	0.07313	0.428274
0.55487	0.88898			1.51536	8.36669	5.24742	0.0736387
0.233294	0.449136			1.5259	0.164899	0.158946	0.281578
0.17019	0.122023			0.176123	1.35628	0.0506465	0.195685
1.69375	0.996694			0.582229	0.312009	0.0101429	0
	0.172566			0.121553	0.12325	0.0800257	0.0869667
				0.166623	0.348603	0.0317216	0
				0	1.17663	0.443377	0.154065
						0.0307474	0
						0.446461	0.144747
						1.58049	0.0515318

## Sheet: CD3g
control d12	1PAT d12	control d15	1PAT d15	control d23	1PAT d23
0.417897	3.18484	0.706138	0.404167	0.466139	1.30029
0.345371	0.398105	0.548294	0.119744	0.661509	0.520811
0.210402	0.211132	0.3732	0.0920156	0.381256	1.33685
2.38869	0.164507	0.525959	0.900016	0.15864	0.533601
2.36398	0.183802	0.663433	0.636407	1.51449	1.19651
0.563005	0.103753	0.984881	0.694007	0.70409	0.212249
3.25176	0.292442	0.743818	0.362995	0.0874033	0.275253
0.321128	1.10667	1.92255	0.80275	1.61198	0.32961
0.622532	0.543827	2.53682	0.475666	0.641194	1.04162
0.782531	0.126413	1.52417	0.248794	0.610826	5.18316
1.87413	0.135957	0.23701	0.404167	2.29554	0.544813
0.305919	1.40563	1.23373	0.261163	2.71101	2.1642
0.927372	1.4552			1.95048	0.121483
0.763775	0.832903			0.368269	0.283974
0.905145	0.395355			2.87554	1.78241
0.165651	0.188315			0.312913	0.177247
0.79071	1.05061			0.268656	1.27795
	0.722575			0.248934	0.903648
				1.243	1.41797
				0.888123	1.08586
					0.447151
					1.80104
