# Supplementary material for: Antibiotic-induced acceleration of type 1 diabetes alters maturation of innate intestinal immunity
Source: eLife. 2018 Jul 25;7:e37816. doi: 10.7554/eLife.37816 (PMC6085123; doi:10.7554/eLife.37816)
Supplement: Figure 8—source data 1. [file elife-37816-fig8-data1.xlsx]

## Sheet: flow
Sample:	Treatment	Gender	Counting Bead Count	Live CD45+ Count	B Cells (% Live CD45)	CD4+ T Cells (% Live CD45)	CD44+ (% CD4 T Cells)	CD62L+ (% CD4 T Cells)	CD8+ T Cells (% Live CD45)	CD44+ (% CD8 T Cells)	CD62L+ (% CD8 T Cells)		LIVE CD45+ in sample	B Cells	CD4 T Cells	CD44+ CD4 T Cells	CD62L + CD4	CD8 T Cells	CD44+ CD8 T Cells	CD8+ CD62L+
Spleen	Control	Female	1572	1450000	27.8	24.3	9.82	67.1	10.1	5.19	68.2		3.01315e+07	8.37655e+06	7.32195e+06	719015	4.91303e+06	3.04328e+06	157946	2.07552e+06
Spleen	Control	Female	1737	1010000	28.7	26.5	16	62	12.5	11	69		1.89944e+07	5.4514e+06	5.03353e+06	805364	3.12079e+06	2.3743e+06	261173	1.63827e+06
Spleen	Control	Female	1053	1190000	29.2	23	14.1	70.3	10.4	5.96	71.9		3.69167e+07	1.07797e+07	8.49085e+06	1.19721e+06	5.96907e+06	3.83934e+06	228825	2.76049e+06
Spleen	Control	Female	1762	1030000	27.7	24.3	15.4	63.2	10.3	6.57	67.6		1.90957e+07	5.28952e+06	4.64026e+06	714600	2.93264e+06	1.96686e+06	129223	1.3296e+06
Spleen	Control	Female	2242	1250000	24.3	24.7	10.4	69.1	10.3	5.54	70.4		1.82129e+07	4.42574e+06	4.49859e+06	467853	3.10852e+06	1.87593e+06	103926	1.32065e+06
Spleen	Control	Female	1778	1340000	24.5	24.1	8.32	71.4	9.1	4.38	73.7		2.46194e+07	6.03176e+06	5.93328e+06	493649	4.23636e+06	2.24037e+06	98128.1	1.65115e+06
Spleen	Control	Male	1289	1230000	36.3	27.8	9.26	69.9	12.3	3.74	76		3.11715e+07	1.13152e+07	8.66566e+06	802440	6.0573e+06	3.83409e+06	143395	2.91391e+06
Spleen	Control	Male	1126	1250000	37.2	26.1	8.48	60.7	9.7	3.55	64.3		3.62641e+07	1.34902e+07	9.46492e+06	802625	5.74521e+06	3.51761e+06	124875	2.26183e+06
Spleen	Control	Male	1368	1200000	45.9	24	9.4	65.4	8.63	3.1	69.7		2.8655e+07	1.31526e+07	6.87719e+06	646456	4.49768e+06	2.47292e+06	76660.6	1.72363e+06
Spleen	Control	Male	1258	1220000	41	23.5	6.9	66.5	8.03	1.98	71.4		3.16799e+07	1.29888e+07	7.44478e+06	513690	4.95078e+06	2.5439e+06	50369.2	1.81634e+06
Spleen	1PAT	Female	1375	1430000	43.6	21.5	14.3	69.2	8.77	9.24	77.4		3.39733e+07	1.48124e+07	7.30427e+06	1.04451e+06	5.05455e+06	2.97946e+06	275302	2.3061e+06
Spleen	1PAT	Female	1977	1320000	35.9	31.9	14.9	72.2	13.2	14.6	79.6		2.18108e+07	7.83009e+06	6.95765e+06	1.03669e+06	5.02343e+06	2.87903e+06	420338	2.29171e+06
Spleen	1PAT	Female	2003	1470000	35.5	21.4	14.7	68.2	9.2	11.9	73.4		2.3974e+07	8.51078e+06	5.13044e+06	754175	3.49896e+06	2.20561e+06	262468	1.61892e+06
Spleen	1PAT	Female	1834	1290000	39.2	27.5	12.6	77.7	10.9	11.1	82.9		2.29771e+07	9.00702e+06	6.3187e+06	796156	4.90963e+06	2.5045e+06	278000	2.07623e+06
Spleen	1PAT	Female	2082	1490000	23.7	22.2	7.73	77.9	9.86	3.48	80.9		2.33782e+07	5.54062e+06	5.18995e+06	401183	4.04297e+06	2.30509e+06	80217	1.86482e+06
Spleen	1PAT	Male	1315	1330000	39.2	26.9	7.63	68.2	10.8	2.36	74.3		3.30393e+07	1.29514e+07	8.88757e+06	678122	6.06132e+06	3.56824e+06	84210.5	2.6512e+06
Spleen	1PAT	Male	1774	1430000	38	27.4	8.33	67.6	12	3.33	72.9		2.63322e+07	1.00062e+07	7.21502e+06	601012	4.87736e+06	3.15986e+06	105223	2.30354e+06
Spleen	1PAT	Male	2006	1420000	42.1	28.2	12.5	68	10.7	4.55	76.2		2.3124e+07	9.73519e+06	6.52096e+06	815120	4.43425e+06	2.47426e+06	112579	1.88539e+06
Spleen	1PAT	Male	1819	1450000	44.4	28	14.8	66.8	10.7	5.5	78.4		2.60399e+07	1.15617e+07	7.29119e+06	1.0791e+06	4.87051e+06	2.78627e+06	153245	2.18444e+06
Spleen	1PAT	Male	1180	1370000	39.8	30.8	12.4	72.3	10.9	5.61	74.7		3.79266e+07	1.50948e+07	1.16814e+07	1.44849e+06	8.44564e+06	4.13399e+06	231917	3.08809e+06
Spleen	1PAT	Male	940	1660000	39.8	22.1	12.5	69.4	8.59	3.74	71.7		5.76879e+07	2.29598e+07	1.2749e+07	1.59363e+06	8.84783e+06	4.95539e+06	185332	3.55302e+06
Pancreas	Control	Female	1427	312705	23.6	36.6	5.38	2.25	13.8	12.8	2.38		2.50544e+06	591283	916990	49334.1	20632.3	345750	44256.1	8228.86
Pancreas	Control	Female	2281	165084	23.5	29.9	7.18	1.77	11.2	13.5	1.38		827471	194456	247414	17764.3	4379.22	92676.7	12511.4	1278.94
Pancreas	Control	Female	1263	342248	23	29.6	5.28	2.07	10.9	11.2	2.03		3.09821e+06	712588	917069	48421.3	18983.3	337705	37822.9	6855.4
Pancreas	Control	Female	2162	79785	24.5	26.6	13.6	7.61	10.6	18.3	6.62		421928	103372	112233	15263.7	8540.92	44724.4	8184.56	2960.75
Pancreas	Control	Female	2246	11811	25.2	26.6	2.03	5.47	6.38	3.18	4.91		60124.3	15151.3	15993.1	324.659	874.82	3835.93	121.983	188.344
Pancreas	Control	Male	1629	26390	22.2	13.8	33.3	9.26	4.71	30.5	4.99		185221	41119.2	25560.6	8511.66	2366.91	8723.93	2660.8	435.324
Pancreas	Control	Male	2335	18908	18.5	14.1	28.5	8.41	3.86	36.1	7		92583.1	17127.9	13054.2	3720.45	1097.86	3573.71	1290.11	250.159
Pancreas	Control	Male	1898	54387	32.8	10	19.3	6.94	3.71	18.4	6.24		92584.1	30367.6	9258.41	1786.87	642.533	3434.87	632.016	214.336
Pancreas	Control	Male	2469	14313	23.1	10.4	22.1	9.21	2.88	23.5	5.1		92585.1	21387.2	9628.85	2127.98	886.817	2666.45	626.616	135.989
Pancreas	1PAT	Female	2219	92529	23	23	5.08	7.29	8.22	8.99	4.04		476753	109653	109653	5570.38	7993.72	39189.1	3523.1	1583.24
Pancreas	1PAT	Female	1893	48742	30	13.1	16	9.62	4.41	14	5.53		294392	88317.5	38565.3	6170.45	3709.98	12982.7	1817.57	717.942
Pancreas	1PAT	Female	1496	186800	35.6	29.3	6.6	2.85	10.8	13	3		1.42764e+06	508239	418298	27607.7	11921.5	154185	20044	4625.55
Pancreas	1PAT	Female	1949	147173	29.1	29.1	9.63	1.91	10.5	17.6	1.96		863355	251236	251236	24194	4798.61	90652.2	15954.8	1776.78
Pancreas	1PAT	Female	1512	34838	31.6	14.8	24.4	18.2	5.82	13	19.3		263435	83245.6	38988.5	9513.18	7095.9	15331.9	1993.15	2959.07
Pancreas	1PAT	Female	1493	100870	29.2	28.4	7.26	2.86	12.2	10.5	2.94		772458	225558	219378	15926.9	6274.22	94239.9	9895.19	2770.65
Pancreas	1PAT	Male	2519	24343	33.4	13.2	22	5.52	4.81	15	3.93		110489	36903.3	14584.5	3208.6	805.067	5314.52	797.178	208.861
Pancreas	1PAT	Male	2358	22190	40.7	11.9	24.6	15.2	4.59	22.8	25		107594	43790.6	12803.6	3149.69	1946.15	4938.55	1125.99	1234.64
Pancreas	1PAT	Male	2027	208052	43.1	18.1	18.2	9.05	6.55	14.5	9.9		1.17352e+06	505788	212407	38658.1	19222.9	76865.7	11145.5	7609.7
Pancreas	1PAT	Male	1809	60397	41.3	11.4	21.1	6.77	4.37	17.2	11.7		381724	157652	43516.6	9181.99	2946.07	16681.3	2869.19	1951.72
Pancreas	1PAT	Male	1877	214923	29.6	26.6	14.4	5.39	9.03	18.5	4.55		381725	112991	101539	14621.6	5472.95	34469.8	6376.91	1568.38

## Sheet: IgA
Male	Male	Male		Male	Male	Male			Female	Female	Female		Female	Female	Female
Control	Control	Control		1PAT	1PAT	1PAT			Control	Control	Control		1PAT	1PAT	1PAT
Week4	Week6	Week10		Week4	Week6	Week10			Week4	Week6	Week10		Week4	Week6	Week10
17	12	23		1	17	16			15	43	23		3	9	24
23	18	27		2	11	15			40	20	27		3	13	19
2	8	12		3	10	20			32	40	12		4	16	14
0	7	33		5	10	30			36	20	33		2	17	22
3	35	36		4	17	28			21	38	36		1	11	40
20	38	60		3	19	15			20	28	60		2	7	31
11	19	34		2	13	10			9	29	34		2	10	14
3	13	59		4	15	15			17	34	59		4	9	32
15	17	13		2	9	17			11	33	13		2	7	16
0	8	10		4	9	19			3	21	10		4	13	17
1	3	19		4	15	45			2	15	19		2	7	15
3	3	12		3	9	11			6	22	12		4	15	33
1	6	56		4	17	13			5	15	56		3	9	29
24	21	29		6	17	13			1	15	29		2	19	12
15	27	26		3	15	15			2	2	26		4	20	22
22	21	31		3	5	19			1	2	31		13	16	55
3	15	31		3	8	16			3	3	31		4	11	17
3	15	51		4	10	16			15	32	51		2	8	13
10	4	45		5	12	17			14	21	45		15	11	31
13		2			9	16			35	34	2		8	7	31
					11	9			19	24			3	10	21
					10	7			7	50			4
					7	17			10	16
									14	16
									4	7
