# Supplementary material for: Antibiotic-induced acceleration of type 1 diabetes alters maturation of innate intestinal immunity
Source: eLife. 2018 Jul 25;7:e37816. doi: 10.7554/eLife.37816 (PMC6085123; doi:10.7554/eLife.37816)
Supplement: Supplementary file 3. [file elife-37816-supp3.xlsx]

## Sheet: Differential genes_males 
Gene	baseMean	log2FoldChange	lfcSE	stat	padj	description
Hyou1	5800.5	-0.436303	0.0925982	-4.71179	1.72406e-09	hypoxia up-regulated 1
Manf	3301.71	-0.490291	0.108106	-4.53527	7.17281e-09	mesencephalic astrocyte-derived neurotrophic factor
Sdf2l1	1180.64	-0.569363	0.126861	-4.48809	8.3138e-09	stromal cell-derived factor 2-like 1
Hspa5	24200.2	-0.418052	0.0968416	-4.31686	4.42365e-08	heat shock protein 5
Urah	126.196	-0.665387	0.157231	-4.2319	7.58766e-08	urate (5-hydroxyiso-) hydrolase
Creld2	1796.36	-0.505702	0.119037	-4.24829	7.58766e-08	cysteine-rich with EGF-like domains 2
Lman2	6531.98	-0.221929	0.0530315	-4.18484	1.08917e-07	lectin, mannose-binding 2
Ntn4	324.738	0.573086	0.137388	4.17129	1.10442e-07	netrin 4
Cln5	728.302	0.342668	0.0826032	4.14837	1.25853e-07	ceroid-lipofuscinosis, neuronal 5
Cxcl9	60.6866	-0.614603	0.155593	-3.95007	9.19451e-07	chemokine (C-X-C motif) ligand 9
Nfkbiz	1087.4	-0.45231	0.117655	-3.84437	2.45178e-06	nuclear factor of kappa light polypeptide gene enhancer in B cells inhibitor, zeta
Gm5535	18.7839	-0.52976	0.139915	-3.7863	3.20911e-06	predicted gene 5535
Pla2g2d	31.9789	-0.593057	0.156473	-3.79016	3.20911e-06	phospholipase A2, group IID
Pdia4	4370.66	-0.433472	0.114284	-3.79293	3.20911e-06	protein disulfide isomerase associated 4
Fbxl3	2887.32	0.411375	0.108406	3.79476	3.20911e-06	F-box and leucine-rich repeat protein 3
Calr	23639	-0.336551	0.0892227	-3.77203	3.4644e-06	calreticulin
Slc28a3	473.559	-0.479068	0.128722	-3.72173	5.33997e-06	solute carrier family 28 (sodium-coupled nucleoside transporter), member 3
Rnpep	2939.71	-0.349041	0.0948078	-3.68156	7.10686e-06	arginyl aminopeptidase (aminopeptidase B)
Srprb	645.353	-0.32445	0.0881476	-3.68076	7.10686e-06	signal recognition particle receptor, B subunit
Tnf	26.4928	-0.586612	0.159921	-3.66814	7.62397e-06	tumor necrosis factor
Tmem208	995.036	-0.206383	0.0563989	-3.65935	7.66679e-06	transmembrane protein 208
Ahsa1	2189.46	-0.330174	0.0903847	-3.65298	7.66679e-06	AHA1, activator of heat shock protein ATPase 1
Prss27	151.241	-0.532846	0.145795	-3.65476	7.66679e-06	protease, serine 27
Dnajb11	3545.03	-0.309117	0.0849149	-3.64032	8.29308e-06	DnaJ heat shock protein family (Hsp40) member B11
Pdia6	5987.81	-0.401943	0.112074	-3.58641	1.3268e-05	protein disulfide isomerase associated 6
Fbxo11	1376.87	0.220414	0.0615522	3.58094	1.34308e-05	F-box protein 11
Nudc	1084.56	-0.203668	0.0569877	-3.5739	1.3817e-05	nudC nuclear distribution protein
Fam46a	2760.43	0.516499	0.144717	3.56902	1.39468e-05	family with sequence similarity 46, member A
Gpx2	8094.14	-0.568827	0.159936	-3.55658	1.51255e-05	glutathione peroxidase 2
Nif3l1	583.481	-0.201514	0.0569203	-3.54029	1.70182e-05	Ngg1 interacting factor 3-like 1 (S. pombe)
Fkbp4	6890.83	-0.274994	0.0779825	-3.52636	1.81544e-05	FK506 binding protein 4
Nfkbid	143.606	-0.417787	0.118423	-3.52793	1.81544e-05	nuclear factor of kappa light polypeptide gene enhancer in B cells inhibitor, delta
Igkv2-109	16.4455	-0.495145	0.141418	-3.50129	2.10532e-05	immunoglobulin kappa variable 2-109
Dmbt1	52357.1	-0.560829	0.16021	-3.50059	2.10532e-05	deleted in malignant brain tumors 1
Prkcsh	4243.6	-0.177079	0.0505764	-3.50123	2.10532e-05	protein kinase C substrate 80K-H
Fam134b	1020.01	0.541482	0.155354	3.48546	2.35171e-05	family with sequence similarity 134, member B
Ubash3b	296.84	-0.359695	0.103936	-3.46075	2.79154e-05	ubiquitin associated and SH3 domain containing, B
Stip1	3133.28	-0.356118	0.102875	-3.46166	2.79154e-05	stress-induced phosphoprotein 1
Alkbh6	436.114	-0.277009	0.0807685	-3.42967	3.60429e-05	alkB homolog 6
Ifi203	211.675	0.421289	0.123079	3.42292	3.73436e-05	interferon activated gene 203
C1qb	801.951	-0.300455	0.0879341	-3.41682	3.75718e-05	complement component 1, q subcomponent, beta polypeptide
Alg12	531.938	-0.326554	0.095502	-3.41934	3.75718e-05	asparagine-linked glycosylation 12 (alpha-1,6-mannosyltransferase)
Rab25	2491.26	-0.288744	0.0845921	-3.41337	3.78539e-05	RAB25, member RAS oncogene family
Arhgef39	841.721	-0.262469	0.0772839	-3.39616	4.31584e-05	Rho guanine nucleotide exchange factor (GEF) 39
Romo1	617.747	-0.290289	0.0856859	-3.38782	4.54606e-05	reactive oxygen species modulator 1
Mybl2	337.204	-0.415556	0.122837	-3.383	4.6424e-05	myeloblastosis oncogene-like 2
S100pbp	557.991	0.328347	0.0972611	3.37593	4.83865e-05	S100P binding protein
Tmem205	451.407	-0.314122	0.0941778	-3.33542	6.777e-05	transmembrane protein 205
Thrsp	113.738	0.485155	0.145863	3.32611	7.20334e-05	thyroid hormone responsive
Gbp8	122.518	-0.410299	0.123545	-3.32105	7.37926e-05	guanylate-binding protein 8
Cyba	942.523	-0.444897	0.134698	-3.30292	8.47468e-05	cytochrome b-245, alpha polypeptide
Sowahc	868.845	0.320537	0.0971942	3.2979	8.68267e-05	sosondowah ankyrin repeat domain family member C
Wnk4	394.248	0.37102	0.112717	3.29161	8.99698e-05	WNK lysine deficient protein kinase 4
Krt87	9.97557	-0.515943	0.157181	-3.28247	9.55811e-05	keratin 87
Gab1	1009.76	0.346942	0.105812	3.27886	9.68256e-05	growth factor receptor bound protein 2-associated protein 1
Mzb1	36.0586	-0.514857	0.157167	-3.27586	9.75891e-05	marginal zone B and B1 cell-specific protein 1
Tmem253	1099.94	-0.370181	0.113615	-3.2582	0.000111639	transmembrane protein 253
Mfsd2a	475.319	-0.515159	0.158334	-3.25363	0.000114105	major facilitator superfamily domain containing 2A
Hsp90ab1	28422.6	-0.300775	0.0926655	-3.24582	0.000119944	heat shock protein 90 alpha (cytosolic), class B member 1
Sestd1	1098.53	0.177966	0.0551911	3.22454	0.000132601	SEC14 and spectrin domains 1
Reg3a	5657.79	-0.50163	0.155465	-3.22665	0.000132601	regenerating islet-derived 3 alpha
Gm20394	3.47114	0.416429	0.128949	3.22941	0.000132601	NA
Trabd	2607.95	-0.266912	0.0827309	-3.22627	0.000132601	TraB domain containing
Cul7	488.256	0.206042	0.0638032	3.22933	0.000132601	cullin 7
Hif3a	348.183	0.512967	0.159373	3.21865	0.000137259	hypoxia inducible factor 3, alpha subunit
Mmp15	1218.67	0.371203	0.115519	3.21335	0.000141409	matrix metallopeptidase 15
Prss16	35.2759	-0.493426	0.154933	-3.18477	0.000177337	protease, serine 16 (thymus)
Timp3	1140.64	0.410716	0.129338	3.17553	0.000188827	tissue inhibitor of metalloproteinase 3
Mptx2	3136.03	-0.502083	0.158765	-3.16242	0.000207684	mucosal pentraxin 2
Ocln	3639.94	0.276263	0.087743	3.14855	0.000229828	occludin
Gcat	908.571	-0.367805	0.116962	-3.14466	0.000234051	glycine C-acetyltransferase (2-amino-3-ketobutyrate-coenzyme A ligase)
Dnase1l3	460.675	-0.439194	0.139927	-3.13873	0.000242442	deoxyribonuclease 1-like 3
Pkmyt1	423.958	-0.374019	0.119476	-3.1305	0.000256002	protein kinase, membrane associated tyrosine/threonine 1
Slc27a3	123.777	-0.358351	0.115069	-3.11422	0.000270616	solute carrier family 27 (fatty acid transporter), member 3
Trappc6a	706.901	-0.230405	0.0738534	-3.11976	0.000270616	trafficking protein particle complex 6A
Mars	1449.64	-0.294184	0.0944057	-3.11616	0.000270616	methionine-tRNA synthetase
Gm5430	20.1846	-0.49219	0.15801	-3.11493	0.000270616	glyceraldehyde-3-phosphate dehydrogenase pseudogene
Ndufs8	2199.72	-0.293221	0.0941045	-3.11591	0.000270616	NADH dehydrogenase (ubiquinone) Fe-S protein 8
Bcorl1	745.137	0.255445	0.0819509	3.11705	0.000270616	BCL6 co-repressor-like 1
Pigr	39198.5	-0.293285	0.0943299	-3.10914	0.000276702	polymeric immunoglobulin receptor
Dalrd3	973.723	-0.173965	0.0559646	-3.10848	0.000276702	DALR anticodon binding domain containing 3
B3galt5	1086.72	-0.326379	0.105183	-3.10295	0.000286033	UDP-Gal:betaGlcNAc beta 1,3-galactosyltransferase, polypeptide 5
Zfp677	91.5396	0.37907	0.122416	3.09657	0.000297783	zinc finger protein 677
Exo1	268.394	-0.318534	0.102937	-3.09446	0.000299355	exonuclease 1
Steap1	36.5844	-0.480294	0.155513	-3.08846	0.00030712	six transmembrane epithelial antigen of the prostate 1
Pdss2	503.255	-0.34233	0.110841	-3.08849	0.00030712	prenyl (solanesyl) diphosphate synthase, subunit 2
Ddost	5373.58	-0.295393	0.0957692	-3.08442	0.000311508	dolichyl-di-phosphooligosaccharide-protein glycotransferase
Ltf	21.0507	-0.459054	0.148855	-3.08391	0.000311508	lactotransferrin
Mtmr7	392.346	0.296208	0.0962648	3.07701	0.000325832	myotubularin related protein 7
Ifit1bl2	1821.57	0.470743	0.153235	3.07202	0.000335554	interferon induced protein with tetratricopeptide repeats 1B like 2
Mrps2	966.057	-0.275476	0.0897561	-3.06916	0.000338828	mitochondrial ribosomal protein S2
Fabp4	984.951	0.488502	0.159218	3.06813	0.000338828	fatty acid binding protein 4, adipocyte
Zfp655	1086.25	0.30553	0.0997849	3.06188	0.000352617	zinc finger protein 655
Apcdd1	261.938	0.458258	0.1501	3.05301	0.000374857	adenomatosis polyposis coli down-regulated 1
Itpripl2	3337.66	0.392169	0.128782	3.04521	0.000386901	inositol 1,4,5-triphosphate receptor interacting protein-like 2
Hmgxb4	544.516	-0.206631	0.0678534	-3.04525	0.000386901	HMG box domain containing 4
Stn1	235.635	-0.268517	0.088128	-3.0469	0.000386901	NA
Gsr	4341.11	-0.428715	0.141077	-3.03888	0.000398909	glutathione reductase
Ube2l3	1132.86	-0.188956	0.0621571	-3.03997	0.000398909	ubiquitin-conjugating enzyme E2L 3
Fut7	4.68697	-0.439043	0.144756	-3.03298	0.000403806	fucosyltransferase 7
Edem2	1598.85	-0.238409	0.0785631	-3.03462	0.000403806	ER degradation enhancer, mannosidase alpha-like 2
Rundc3b	197.282	0.462757	0.152643	3.03162	0.000403806	RUN domain containing 3B
Hsp90b1	16528.5	-0.293452	0.0967061	-3.03448	0.000403806	heat shock protein 90, beta (Grp94), member 1
AI662270	31.0379	-0.457509	0.150931	-3.03124	0.000403806	expressed sequence AI662270
Tmem258	1336.67	-0.302231	0.0997732	-3.02917	0.000406651	transmembrane protein 258
Yars	1189.47	-0.267833	0.0885503	-3.02465	0.000412504	tyrosyl-tRNA synthetase
4930512H18Rik	19.3554	0.417109	0.137959	3.02343	0.000412504	RIKEN cDNA 4930512H18 gene
Ighj2	7.31777	-0.462898	0.153139	-3.02273	0.000412504	immunoglobulin heavy joining 2
Lgals2	24027.9	-0.280091	0.0925831	-3.0253	0.000412504	lectin, galactose-binding, soluble 2
Mrps34	230.274	-0.344033	0.113973	-3.01854	0.000422709	mitochondrial ribosomal protein S34
Snph	368.332	-0.393182	0.130913	-3.00339	0.000472774	syntaphilin
Ctcflos	15.123	0.480816	0.160257	3.00028	0.000480291	CCCTC-binding factor (zinc finger protein)-like, opposite strand
Ugcg	3248.29	0.381092	0.127168	2.99676	0.000481157	UDP-glucose ceramide glucosyltransferase
Cdk5rap3	1240.76	-0.2339	0.0780435	-2.99705	0.000481157	CDK5 regulatory subunit associated protein 3
Mydgf	1636.39	-0.283877	0.0947289	-2.99673	0.000481157	myeloid derived growth factor
Ifi44	180.474	0.31631	0.105602	2.99531	0.00048244	interferon-induced protein 44
Hsph1	3104.29	-0.448906	0.150425	-2.98425	0.00052215	heat shock 105kDa/110kDa protein 1
C1qc	949.259	-0.264944	0.0888621	-2.98152	0.0005246	complement component 1, q subcomponent, C chain
H2afy	3362.02	-0.20704	0.0694343	-2.98181	0.0005246	H2A histone family, member Y
Syt14	81.4393	0.472281	0.158944	2.97136	0.000563726	synaptotagmin XIV
Shmt2	1906.73	-0.342337	0.115437	-2.96556	0.00058518	serine hydroxymethyltransferase 2 (mitochondrial)
Ifit3	485.071	0.313436	0.105849	2.96117	0.000600792	interferon-induced protein with tetratricopeptide repeats 3
Prdx6	4671.62	-0.329897	0.111469	-2.95955	0.000603537	peroxiredoxin 6
Rps27l	1437.23	-0.218358	0.073821	-2.95794	0.000606284	ribosomal protein S27-like
Gtf3c5	693.193	-0.168787	0.0571047	-2.95574	0.000607047	general transcription factor IIIC, polypeptide 5
Reg3g	146593	-0.357215	0.120842	-2.95605	0.000607047	regenerating islet-derived 3 gamma
Txndc11	1380.11	-0.207251	0.0701635	-2.95383	0.000611389	thioredoxin domain containing 11
Mrps36	71.5447	-0.36737	0.124717	-2.94562	0.0006469	mitochondrial ribosomal protein S36
Gm8221	110.223	-0.468273	0.159162	-2.94212	0.000659694	apolipoprotein L 7c pseudogene
Ubxn11	42.0598	-0.428199	0.145639	-2.94015	0.0006648	UBX domain protein 11
Isyna1	1630.1	-0.405715	0.138051	-2.93889	0.000666234	myo-inositol 1-phosphate synthase A1
Hspe1	484.077	-0.323438	0.110497	-2.92712	0.000724705	heat shock protein 1 (chaperonin 10)
Gls2	106.295	-0.415347	0.142238	-2.92009	0.000755653	glutaminase 2 (liver, mitochondrial)
Wwc1	3424.89	0.364365	0.124791	2.9198	0.000755653	WW, C2 and coiled-coil domain containing 1
Ms4a6d	159.542	-0.291506	0.0999207	-2.91737	0.000764312	membrane-spanning 4-domains, subfamily A, member 6D
Rnf103	2797.17	0.346588	0.118896	2.91506	0.000772427	ring finger protein 103
Pycard	4744.44	-0.318062	0.10922	-2.91211	0.000775107	PYD and CARD domain containing
Tuba1b	549.131	-0.351639	0.120764	-2.91179	0.000775107	tubulin, alpha 1B
Slc15a3	142.363	-0.385364	0.132273	-2.91339	0.000775107	solute carrier family 15, member 3
Hist1h3a	2.54917	-0.324539	0.11159	-2.90833	0.000790503	histone cluster 1, H3a
Mier1	1472.24	0.227415	0.0782613	2.90584	0.000800106	MEIR1 treanscription regulator
A530016L24Rik	13.6313	0.309142	0.106452	2.90405	0.000805551	RIKEN cDNA A530016L24 gene
Abcd2	43.4215	0.462875	0.159456	2.90284	0.000807417	ATP-binding cassette, sub-family D (ALD), member 2
Npl	109.033	-0.334702	0.115387	-2.90068	0.000811062	N-acetylneuraminate pyruvate lyase
Brca1	363.633	-0.311554	0.107415	-2.90046	0.000811062	breast cancer 1, early onset
Msr1	203.374	-0.39284	0.135512	-2.89893	0.000815064	macrophage scavenger receptor 1
Tshz1	1002.55	0.251322	0.0868614	2.89337	0.000838731	teashirt zinc finger family member 1
Cox8a	4125.57	-0.280922	0.0971186	-2.89257	0.000838731	cytochrome c oxidase subunit VIIIa
Poll	199.212	-0.260236	0.0899182	-2.89414	0.000838731	polymerase (DNA directed), lambda
Pdia3	17575.4	-0.257898	0.089352	-2.88631	0.000874188	protein disulfide isomerase associated 3
Gm3200	7.01625	-0.42546	0.147457	-2.88532	0.000875019	glyceraldehyde-3-phosphate dehydrogenase pseudogene
Xylt1	179.129	0.346398	0.120278	2.87998	0.000888623	xylosyltransferase 1
Myl7	89.0942	-0.442265	0.153578	-2.87973	0.000888623	myosin, light polypeptide 7, regulatory
Slfn5	424.55	0.459651	0.159653	2.87906	0.000888623	schlafen 5
Dad1	2396.51	-0.313434	0.108848	-2.87956	0.000888623	defender against cell death 1
Pex6	1238.71	-0.180012	0.0624982	-2.88027	0.000888623	peroxisomal biogenesis factor 6
3632451O06Rik	110.439	0.3851	0.134362	2.86613	0.000974717	RIKEN cDNA 3632451O06 gene
Wasf2	5991.98	0.229311	0.0801364	2.86151	0.000996968	WAS protein family, member 2
2810006K23Rik	149.841	-0.293126	0.10241	-2.86229	0.000996968	RIKEN cDNA 2810006K23 gene
Xlr3a	25.197	-0.421439	0.147342	-2.86027	0.00100014	X-linked lymphocyte-regulated 3A
Aunip	95.8988	-0.417815	0.146131	-2.85918	0.00100222	aurora kinase A and ninein interacting protein
Trdmt1	158.835	0.427854	0.149785	2.85645	0.00101072	tRNA aspartic acid methyltransferase 1
Rnf139	867.884	0.154796	0.0541818	2.85698	0.00101072	ring finger protein 139
Serp1	5303.89	-0.214291	0.0750806	-2.85415	0.00102226	stress-associated endoplasmic reticulum protein 1
Sart3	1268.85	-0.148741	0.0522059	-2.84911	0.00105565	squamous cell carcinoma antigen recognized by T cells 3
Dok3	127.68	-0.33118	0.116299	-2.84765	0.00106102	docking protein 3
Kmt2e	2207.55	0.242638	0.0852749	2.84536	0.0010731	lysine (K)-specific methyltransferase 2E
Gmppa	1974.05	-0.28335	0.0996347	-2.84389	0.00107869	GDP-mannose pyrophosphorylase A
Hikeshi	515.064	-0.216958	0.0763551	-2.84143	0.00108382	heat shock protein nuclear import factor
Cdc6	295.169	-0.352192	0.12395	-2.8414	0.00108382	cell division cycle 6
Gfer	595.704	-0.235504	0.082897	-2.84092	0.00108382	growth factor, erv1 (S. cerevisiae)-like (augmenter of liver regeneration)
Tyms	715.68	-0.290876	0.102502	-2.83777	0.00109855	thymidylate synthase
Mlec	15044.4	-0.226613	0.0798821	-2.83684	0.00109855	malectin
Cdh9	35.8729	0.432607	0.152474	2.83726	0.00109855	cadherin 9
Hba-ps4	58.8871	-0.436727	0.154061	-2.83477	0.00110947	hemoglobin alpha, pseudogene 4
Igfals	4.78725	0.304945	0.107836	2.82785	0.00116232	insulin-like growth factor binding protein, acid labile subunit
Polq	187.529	-0.313937	0.111101	-2.82569	0.00117355	polymerase (DNA directed), theta
Sec11c	846.138	-0.263493	0.0932697	-2.82507	0.00117355	SEC11 homolog C, signal peptidase complex subunit
Ostc	2737.48	-0.286171	0.10136	-2.8233	0.00118263	oligosaccharyltransferase complex subunit (non-catalytic)
Tlk2	944.622	0.196007	0.0695119	2.81976	0.001188	tousled-like kinase 2 (Arabidopsis)
Id2	1183.86	0.311782	0.110507	2.82137	0.001188	inhibitor of DNA binding 2
Gm15585	12.2271	0.452837	0.160511	2.82121	0.001188	NA
Nrtn	66.3233	-0.410486	0.145559	-2.82006	0.001188	neurturin
1500026H17Rik	12.4538	0.427262	0.151602	2.81831	0.00119453	RIKEN cDNA 1500026H17 gene
Igsf3	1370.7	0.332409	0.118037	2.81614	0.00119545	immunoglobulin superfamily, member 3
Auts2	74.045	0.382014	0.135595	2.81732	0.00119545	autism susceptibility candidate 2
Slc39a11	1589.72	-0.255327	0.0906684	-2.81605	0.00119545	solute carrier family 39 (metal ion transporter), member 11
Asf1b	516.725	-0.294868	0.104801	-2.8136	0.00121118	anti-silencing function 1B histone chaperone
Tgfbr3	968.439	0.37004	0.131615	2.81153	0.00121714	transforming growth factor, beta receptor III
Smoc1	236.081	0.302684	0.107657	2.81156	0.00121714	SPARC related modular calcium binding 1
Phf3	2003.04	0.229308	0.0816844	2.80725	0.00123885	PHD finger protein 3
Pax8	306.833	-0.284131	0.101219	-2.80708	0.00123885	paired box 8
Apol10b	24.3592	-0.433398	0.154319	-2.80845	0.00123885	apolipoprotein L 10B
Fbxo5	263.909	-0.354048	0.126482	-2.79919	0.00130061	F-box protein 5
Eif5a	7732.33	-0.251478	0.0898219	-2.79974	0.00130061	eukaryotic translation initiation factor 5A
Usp18	400.338	0.294562	0.105271	2.79814	0.00130405	ubiquitin specific peptidase 18
4930481A15Rik	12.0873	0.44903	0.160513	2.79747	0.00130405	RIKEN cDNA 4930481A15 gene
Adig	13.2042	0.296985	0.10623	2.79567	0.00130678	adipogenin
Atg16l2	493.039	0.441516	0.157957	2.79516	0.00130678	autophagy related 16-like 2 (S. cerevisiae)
Eef2kmt	348.249	-0.249252	0.0891507	-2.79585	0.00130678	eukaryotic elongation factor 2 lysine methyltransferase
Itgal	143.188	-0.367241	0.131559	-2.79145	0.00133668	integrin alpha L
Malsu1	335.905	-0.245925	0.0883234	-2.78438	0.00140197	mitochondrial assembly of ribosomal large subunit 1
Igha	2871.64	-0.445657	0.160169	-2.78241	0.00141553	immunoglobulin heavy constant alpha
Plekha1	2875.38	0.387324	0.13947	2.77711	0.00146512	pleckstrin homology domain containing, family A (phosphoinositide binding specific) member 1
Alkbh2	40.6529	-0.40931	0.1475	-2.77498	0.00148115	alkB homolog 2, alpha-ketoglutarate-dependent dioxygenase
Fam76a	654.045	0.24644	0.0888895	2.77243	0.00149482	family with sequence similarity 76, member A
Hgsnat	762.313	0.242386	0.0874128	2.77289	0.00149482	heparan-alpha-glucosaminide N-acetyltransferase
Dnajc5	3666.21	0.248279	0.0895829	2.7715	0.00149788	DnaJ heat shock protein family (Hsp40) member C5
Gstm4	208.016	-0.409834	0.14792	-2.77064	0.00150023	glutathione S-transferase, mu 4
Gsdmc4	1462.72	-0.442409	0.1601	-2.76332	0.00157596	gasdermin C4
Bcs1l	353.235	-0.304387	0.110313	-2.75931	0.0015911	BCS1-like (yeast)
Gm13394	1680.98	-0.259826	0.0941577	-2.75948	0.0015911	glyceraldehyde-3-phosphate dehydrogenase pseudogene
Fnip2	167.178	0.362859	0.13153	2.75876	0.0015911	folliculin interacting protein 2
Cct3	4367.34	-0.239893	0.0869505	-2.75895	0.0015911	chaperonin containing Tcp1, subunit 3 (gamma)
Pgd	6623.05	-0.272354	0.0987227	-2.75878	0.0015911	phosphogluconate dehydrogenase
Dclk3	204.295	0.356543	0.129266	2.75821	0.0015911	doublecortin-like kinase 3
Gprc5b	243.378	0.284784	0.103401	2.75418	0.00163142	G protein-coupled receptor, family C, group 5, member B
Mrps24	930.431	-0.2915	0.105867	-2.75347	0.00163245	mitochondrial ribosomal protein S24
Maf	5833.46	0.341874	0.124234	2.75185	0.00164438	avian musculoaponeurotic fibrosarcoma oncogene homolog
Wdr18	1060.16	-0.219276	0.0797025	-2.75118	0.00164501	WD repeat domain 18
Ntpcr	279.251	-0.240912	0.0875972	-2.75022	0.00164917	nucleoside-triphosphatase, cancer-related
Gm20056	40.1469	0.410928	0.149509	2.74852	0.00166233	calcium-binding protein p22-like
Unc5cl	1789.19	-0.394741	0.143699	-2.74701	0.00167336	unc-5 family C-terminal like
Lsm6	471.843	-0.244894	0.0892601	-2.7436	0.00170812	LSM6 homolog, U6 small nuclear RNA and mRNA degradation associated
Ccnb1ip1	31.4952	-0.437508	0.159505	-2.74291	0.00170912	cyclin B1 interacting protein 1
Lats2	682.948	0.288652	0.105289	2.74152	0.00171899	large tumor suppressor 2
Tufm	359.095	-0.323896	0.118239	-2.73933	0.00173139	Tu translation elongation factor, mitochondrial
Atox1	1180.2	-0.218757	0.0798488	-2.73964	0.00173139	antioxidant 1 copper chaperone
Duoxa2	343.952	-0.31724	0.115919	-2.73673	0.0017414	dual oxidase maturation factor 2
Duox1	45.4096	-0.388817	0.14207	-2.7368	0.0017414	dual oxidase 1
Tssc4	511.223	-0.253782	0.0927045	-2.73753	0.0017414	tumor-suppressing subchromosomal transferable fragment 4
Gm12250	126.34	0.312749	0.114302	2.73616	0.0017414	predicted gene 12250
Ntmt1	336.78	-0.24917	0.0912075	-2.7319	0.00178114	N-terminal Xaa-Pro-Lys N-methyltransferase 1
Igkc	2004.84	-0.438315	0.160427	-2.73217	0.00178114	immunoglobulin kappa constant
Ap1s1	2553.69	-0.253177	0.0927701	-2.72908	0.00181041	adaptor protein complex AP-1, sigma 1
Srp14	998.786	-0.220676	0.0809475	-2.72616	0.00184157	signal recognition particle 14
Golt1b	550.919	-0.173407	0.063712	-2.72173	0.0018939	golgi transport 1B
Cd68	250.299	-0.296962	0.109178	-2.71999	0.00190228	CD68 antigen
Gpaa1	1581.16	-0.152109	0.0559231	-2.71997	0.00190228	GPI anchor attachment protein 1
Churc1	183.439	-0.295002	0.108526	-2.71826	0.00191804	churchill domain containing 1
Ada	5222.17	-0.428968	0.157997	-2.71504	0.00195519	adenosine deaminase
Acsl3	1364.32	0.361906	0.133676	2.70733	0.00204218	acyl-CoA synthetase long-chain family member 3
Ctss	3252.34	0.325543	0.120232	2.70761	0.00204218	cathepsin S
Tmem39a	787.762	-0.228403	0.0843401	-2.70812	0.00204218	transmembrane protein 39a
Enc1	812.881	0.283485	0.104804	2.7049	0.00206341	ectodermal-neural cortex 1
Nfkbie	154.402	-0.272338	0.100688	-2.70478	0.00206341	nuclear factor of kappa light polypeptide gene enhancer in B cells inhibitor, epsilon
Uggt1	3194.87	-0.181546	0.0671804	-2.70237	0.00207948	UDP-glucose glycoprotein glucosyltransferase 1
Cxcr6	31.6905	-0.413562	0.153056	-2.70203	0.00207948	chemokine (C-X-C motif) receptor 6
Cenpx	655.607	-0.273519	0.101225	-2.7021	0.00207948	NA
Pla2g5	198.347	-0.29817	0.110549	-2.69718	0.00214492	phospholipase A2, group V
Gm38079	9.31472	0.429841	0.159462	2.69557	0.0021607	NA
Mto1	352.73	-0.238372	0.0884476	-2.69506	0.0021607	mitochondrial tRNA translation optimization 1
Zfp512b	737.792	0.223208	0.0829875	2.68965	0.00223764	zinc finger protein 512B
Pold2	1199.51	-0.296795	0.1104	-2.68836	0.00224966	polymerase (DNA directed), delta 2, regulatory subunit
Rcan2	57.7458	0.409366	0.152348	2.68704	0.00226214	regulator of calcineurin 2
Rragc	1576.23	0.223081	0.0831598	2.68256	0.00230903	Ras-related GTP binding C
Tmem176b	5321.41	-0.230388	0.0858611	-2.68326	0.00230903	transmembrane protein 176B
Lage3	322.741	-0.254081	0.0947004	-2.68299	0.00230903	L antigen family, member 3
Mrps12	648.313	-0.270233	0.100798	-2.68093	0.00232714	mitochondrial ribosomal protein S12
Yars2	501.424	-0.308343	0.115079	-2.67941	0.00234361	tyrosyl-tRNA synthetase 2 (mitochondrial)
Wdr81	818.788	0.256043	0.0955812	2.6788	0.00234498	WD repeat domain 81
AC122390.1	5.16964	0.377787	0.141167	2.67617	0.0023714	NA
Scin	7048.39	0.393758	0.147117	2.6765	0.0023714	scinderin
Stk16	2006.09	-0.202462	0.0756716	-2.67554	0.0023731	serine/threonine kinase 16
Oas2	373.479	0.27072	0.10123	2.67431	0.00238503	2'-5' oligoadenylate synthetase 2
Slamf8	65.3167	-0.384721	0.143938	-2.67281	0.00240163	SLAM family member 8
Duoxa1	25.8842	-0.358344	0.134134	-2.67153	0.00241469	dual oxidase maturation factor 1
Ccdc124	1002.12	-0.237446	0.0889014	-2.67089	0.00241674	coiled-coil domain containing 124
Rsad2	859.82	0.279063	0.104556	2.66903	0.0024309	radical S-adenosyl methionine domain containing 2
Muc4	186.098	-0.373544	0.139947	-2.66919	0.0024309	mucin 4
Timm13	1352.55	-0.268169	0.100544	-2.66718	0.00245412	translocase of inner mitochondrial membrane 13
Tsen34	661.744	-0.211471	0.0793579	-2.66478	0.0024874	tRNA splicing endonuclease subunit 34
Timm50	1371.78	-0.252658	0.094876	-2.66304	0.00250016	translocase of inner mitochondrial membrane 50
Il18	905.277	-0.409804	0.153865	-2.66341	0.00250016	interleukin 18
Fam3b	2216.96	-0.388725	0.146067	-2.66128	0.00252251	family with sequence similarity 3, member B
Baat	130.362	0.413972	0.155692	2.65891	0.00255048	bile acid-Coenzyme A: amino acid N-acyltransferase
Rpa3	334.004	-0.28495	0.107176	-2.65871	0.00255048	replication protein A3
Imp4	1116.98	-0.183351	0.0690361	-2.65586	0.00259339	IMP4, U3 small nucleolar ribonucleoprotein
Dnajc15	511.04	-0.266959	0.100778	-2.64898	0.00271356	DnaJ heat shock protein family (Hsp40) member C15
Prpf19	3263.68	-0.200629	0.0757754	-2.64768	0.00272898	pre-mRNA processing factor 19
Hsp90aa1	1424.29	-0.278762	0.105339	-2.64633	0.00274545	heat shock protein 90, alpha (cytosolic), class A member 1
Nos2	2210.19	-0.279371	0.105645	-2.64444	0.00277253	nitric oxide synthase 2, inducible
Ube2t	132.313	-0.354819	0.134254	-2.64289	0.00279211	ubiquitin-conjugating enzyme E2T
Wbscr22	896.012	-0.219616	0.0831263	-2.64196	0.00279211	Williams Beuren syndrome chromosome region 22
Gm21887	51.0413	-0.422031	0.159712	-2.64244	0.00279211	NA
Cfi	9.4992	-0.382097	0.144819	-2.63844	0.0028524	complement component factor i
AC155293.3	5.22975	0.382324	0.144955	2.63753	0.00286082	NA
Ssna1	660.85	-0.210515	0.0798674	-2.6358	0.00288511	SS nuclear autoantigen 1
Sppl2b	1097.21	-0.139328	0.0528688	-2.63535	0.00288511	signal peptide peptidase like 2B
Pan3	1504.72	0.191313	0.0726183	2.6345	0.00289253	PAN3 poly(A) specific ribonuclease subunit
Olfr418	77.8932	-0.282364	0.107254	-2.63267	0.00292002	olfactory receptor 418
Gm15283	3.11174	-0.328059	0.124706	-2.63065	0.00295184	predicted gene 15283
Alg3	423.356	-0.266142	0.101203	-2.62977	0.00296014	asparagine-linked glycosylation 3 (alpha-1,3-mannosyltransferase)
Zim1	37.4602	0.421537	0.160412	2.62784	0.00298019	zinc finger, imprinted 1
Mrps27	533.165	-0.323504	0.123104	-2.62789	0.00298019	mitochondrial ribosomal protein S27
Dnajc30	271.262	-0.231099	0.0879841	-2.6266	0.00299095	DnaJ heat shock protein family (Hsp40) member C30
Hexb	2108.47	0.322891	0.122942	2.62637	0.00299095	hexosaminidase B
Gm12735	3.56622	0.340055	0.129611	2.62365	0.00303855	NA
Tmem129	696.78	-0.175805	0.0670315	-2.62272	0.00304092	transmembrane protein 129
Cacna1a	202.009	0.275298	0.104972	2.62259	0.00304092	calcium channel, voltage-dependent, P/Q type, alpha 1A subunit
Xirp1	10.9726	0.417312	0.159228	2.62085	0.0030581	xin actin-binding repeat containing 1
Ccdc85a	29.0462	0.40487	0.154456	2.62127	0.0030581	coiled-coil domain containing 85A
Snu13	154.61	-0.307725	0.117436	-2.62036	0.00305835	NA
Fcgr1	126.011	-0.366326	0.139868	-2.61908	0.0030758	Fc receptor, IgG, high affinity I
Recql4	145.782	-0.28491	0.108862	-2.61717	0.00310729	RecQ protein-like 4
Mndal	190.006	0.412577	0.15785	2.61373	0.00317262	myeloid nuclear differentiation antigen like
Vsig10l	69.7424	0.381637	0.146039	2.61325	0.00317303	V-set and immunoglobulin domain containing 10 like
Snrpa	1079.69	-0.250231	0.0958266	-2.61129	0.00319291	small nuclear ribonucleoprotein polypeptide A
AU020206	908.449	-0.260518	0.099778	-2.61097	0.00319291	expressed sequence AU020206
Serpina3g	64.1125	-0.41778	0.159989	-2.61131	0.00319291	serine (or cysteine) peptidase inhibitor, clade A, member 3G
5430427M07Rik	19.2555	0.351192	0.134556	2.61002	0.00320402	RIKEN cDNA 5430427M07 gene
Hecw2	99.9162	0.413669	0.158592	2.60838	0.0032191	HECT, C2 and WW domain containing E3 ubiquitin protein ligase 2
E130102H24Rik	35.9091	0.409924	0.157181	2.60797	0.0032191	RIKEN cDNA E130102H24 gene
Ubl5	1950.26	-0.20223	0.0775201	-2.60874	0.0032191	ubiquitin-like 5
Cnppd1	2122.57	0.245797	0.0943795	2.60435	0.00327068	cyclin Pas1/PHO80 domain containing 1
Pkn2	2833.34	0.31063	0.119274	2.60434	0.00327068	protein kinase N2
Mrpl38	1256.26	-0.287547	0.110381	-2.60505	0.00327068	mitochondrial ribosomal protein L38
Gm13815	10.3772	-0.34207	0.131554	-2.60022	0.00333459	predicted gene 13815
Alg8	358.587	-0.293529	0.11287	-2.6006	0.00333459	asparagine-linked glycosylation 8 (alpha-1,3-glucosyltransferase)
Dpp9	1587.66	-0.190367	0.0731965	-2.60076	0.00333459	dipeptidylpeptidase 9
Scara5	77.7577	0.416326	0.160178	2.59914	0.00334932	scavenger receptor class A, member 5
Nfs1	1070.17	-0.159878	0.0616823	-2.59195	0.00350186	nitrogen fixation gene 1 (S. cerevisiae)
Rad51c	79.2477	-0.369495	0.142562	-2.59183	0.00350186	RAD51 paralog C
Pld4	396.345	-0.272501	0.105155	-2.59141	0.00350186	phospholipase D family, member 4
Nr1d2	1188.71	0.413368	0.159615	2.58977	0.0035311	nuclear receptor subfamily 1, group D, member 2
Atp5d	8360.11	-0.230238	0.0889267	-2.58908	0.00353352	ATP synthase, H+ transporting, mitochondrial F1 complex, delta subunit
Aif1	144.559	-0.327229	0.126416	-2.5885	0.00353352	allograft inflammatory factor 1
Arhgap4	196.743	-0.312241	0.120633	-2.58835	0.00353352	Rho GTPase activating protein 4
Ptk6	821.095	-0.412922	0.159588	-2.58743	0.0035348	PTK6 protein tyrosine kinase 6
Ssr2	4824.54	-0.272147	0.105173	-2.58762	0.0035348	signal sequence receptor, beta
Snd1	3987.92	-0.272544	0.105389	-2.58608	0.00355729	staphylococcal nuclease and tudor domain containing 1
Sipa1	592.661	-0.208399	0.0806072	-2.58536	0.00356427	signal-induced proliferation associated gene 1
Pigm	775.201	0.222479	0.0861523	2.58239	0.00357339	phosphatidylinositol glycan anchor biosynthesis, class M
Eya2	19.866	-0.413163	0.160044	-2.58156	0.00357339	EYA transcriptional coactivator and phosphatase 2
Gm26825	97.7295	-0.381853	0.147879	-2.58219	0.00357339	NA
Herc6	262.409	0.305451	0.118219	2.58377	0.00357339	hect domain and RLD 6
C1rl	55.2451	-0.38763	0.149998	-2.58423	0.00357339	complement component 1, r subcomponent-like
Sars2	457.428	-0.28868	0.111801	-2.58209	0.00357339	seryl-aminoacyl-tRNA synthetase 2
Tbc1d9	1011.29	0.27259	0.105544	2.58271	0.00357339	TBC1 domain family, member 9
Esco1	505.144	0.256044	0.0991808	2.58159	0.00357339	establishment of sister chromatid cohesion N-acetyltransferase 1
Ago4	204.353	0.319326	0.12382	2.57896	0.00358782	argonaute RISC catalytic subunit 4
Plpp5	1235.31	-0.170229	0.0659843	-2.57984	0.00358782	phospholipid phosphatase 5
Cenpn	178.055	-0.310789	0.120508	-2.57899	0.00358782	centromere protein N
1700021F05Rik	440.572	-0.240561	0.0932816	-2.57887	0.00358782	RIKEN cDNA 1700021F05 gene
Tbc1d12	218.913	0.281539	0.109115	2.58021	0.00358782	TBC1D12: TBC1 domain family, member 12
Acsl1	1703.44	0.341774	0.13262	2.57708	0.00362207	acyl-CoA synthetase long-chain family member 1
Irf2	1728.67	0.244713	0.0950287	2.57515	0.00364986	interferon regulatory factor 2
Marveld2	1486.79	0.231038	0.0897127	2.57531	0.00364986	MARVEL (membrane-associating) domain containing 2
Mcm5	1706.83	-0.289172	0.112333	-2.57424	0.00366218	minichromosome maintenance complex component 5
Chid1	856.61	-0.289933	0.112732	-2.57189	0.00371169	chitinase domain containing 1
Mmp9	442.215	-0.412295	0.160408	-2.57028	0.00371703	matrix metallopeptidase 9
Bola1	254.919	-0.303667	0.118157	-2.57003	0.00371703	bolA-like 1 (E. coli)
Farsa	1292.42	-0.200636	0.0780471	-2.57071	0.00371703	phenylalanyl-tRNA synthetase, alpha subunit
Wsb1	2167.99	0.266836	0.103795	2.57079	0.00371703	WD repeat and SOCS box-containing 1
Lrg1	458.491	-0.27545	0.107224	-2.56892	0.00373527	leucine-rich alpha-2-glycoprotein 1
Crtam	19.1081	0.411857	0.160455	2.5668	0.00377952	cytotoxic and regulatory T cell molecule
Wdr86	29.688	-0.392176	0.152955	-2.564	0.00384253	WD repeat domain 86
Hspa8	1135.04	-0.247742	0.0967737	-2.56001	0.00393845	heat shock protein 8
Vav3	331.725	0.381478	0.149163	2.55746	0.00399695	vav 3 oncogene
Efhd1	50.3766	0.409172	0.160234	2.5536	0.00408162	EF hand domain containing 1
Tlk1	2143.73	0.164132	0.0642688	2.55384	0.00408162	tousled-like kinase 1
Atf2	1114.91	0.19431	0.076131	2.55232	0.0041063	activating transcription factor 2
G6pc	468.105	-0.402464	0.157773	-2.55091	0.00412334	glucose-6-phosphatase, catalytic
Thoc6	413.153	-0.295144	0.115693	-2.55109	0.00412334	THO complex 6
Zbtb1	542.206	0.214893	0.084276	2.54987	0.00414142	zinc finger and BTB domain containing 1
Gdpd3	87.3767	-0.32047	0.12574	-2.54868	0.0041641	glycerophosphodiester phosphodiesterase domain containing 3
Dcaf6	740.433	0.176181	0.0691771	2.54682	0.00417753	DDB1 and CUL4 associated factor 6
Ndufc1	1020.22	-0.293591	0.115261	-2.54719	0.00417753	NADH dehydrogenase (ubiquinone) 1, subcomplex unknown, 1
Plekhj1	620.998	-0.234177	0.0919614	-2.54648	0.00417753	pleckstrin homology domain containing, family J member 1
Sec61g	23.286	-0.388047	0.152309	-2.54775	0.00417753	SEC61, gamma subunit
Cipc	1601.12	0.305956	0.120179	2.54583	0.00417753	CLOCK interacting protein, circadian
Bdh1	4027.24	-0.225464	0.0885755	-2.54544	0.00417753	3-hydroxybutyrate dehydrogenase, type 1
Srsf7	2391.57	-0.147167	0.0578102	-2.54569	0.00417753	serine/arginine-rich splicing factor 7
Pparg	218.981	0.39875	0.156684	2.54493	0.00418097	peroxisome proliferator activated receptor gamma
Mrrf	336.865	-0.242216	0.0953728	-2.53967	0.00432247	mitochondrial ribosome recycling factor
Dbi	7333.57	-0.285248	0.112367	-2.53854	0.00432989	diazepam binding inhibitor
Acot7	810.048	-0.374219	0.147454	-2.53787	0.00432989	acyl-CoA thioesterase 7
Tll1	49.6869	0.385429	0.151841	2.53837	0.00432989	tolloid-like
Pnpla3	30.6849	0.292117	0.115099	2.53796	0.00432989	patatin-like phospholipase domain containing 3
Mospd1	302.719	0.255911	0.100865	2.53715	0.00433957	motile sperm domain containing 1
Klf3	5412.39	0.220166	0.0868009	2.53645	0.00434895	Kruppel-like factor 3 (basic)
Rnf2	607.22	0.242032	0.0955106	2.53408	0.00437276	ring finger protein 2
Mrps5	723.707	-0.252237	0.0994952	-2.53517	0.00437276	mitochondrial ribosomal protein S5
Gm14400	1.49914	0.252275	0.0995256	2.53477	0.00437276	predicted gene 14400
Gm37305	194.064	0.264953	0.104569	2.53375	0.00437276	NA
Krtcap2	1158.38	-0.303652	0.119844	-2.53374	0.00437276	keratinocyte associated protein 2
Cdc45	392.82	-0.267654	0.105654	-2.53331	0.00437425	cell division cycle 45
Topors	871.377	0.1685	0.0665529	2.53182	0.00440745	topoisomerase I binding, arginine/serine-rich
2010110K18Rik	17.8804	-0.40575	0.16032	-2.53087	0.00442455	RIKEN cDNA 2010110K18 gene
Rora	151.643	0.303036	0.119777	2.52999	0.00443977	RAR-related orphan receptor alpha
Nr1d1	2932.81	0.366023	0.144869	2.52659	0.0045216	nuclear receptor subfamily 1, group D, member 1
Lrp12	865.876	0.297418	0.117717	2.52656	0.0045216	low density lipoprotein-related protein 12
Spaca6	238.894	0.309718	0.122698	2.52422	0.00458221	sperm acrosome associated 6
Pf4	125.871	-0.320415	0.127019	-2.52258	0.00461007	platelet factor 4
Aldh1l1	3493.45	-0.304379	0.120653	-2.52276	0.00461007	aldehyde dehydrogenase 1 family, member L1
Crebrf	845.104	0.371732	0.147413	2.52171	0.00462572	CREB3 regulatory factor
Pex11g	174.603	-0.287092	0.113906	-2.52043	0.0046542	peroxisomal biogenesis factor 11 gamma
Exosc3	415.697	-0.175992	0.0698841	-2.51834	0.00470891	exosome component 3
Tex12	21.4006	-0.403153	0.16015	-2.51734	0.0047291	testis expressed gene 12
Rabepk	365.822	-0.213301	0.0847683	-2.51628	0.00475123	Rab9 effector protein with kelch motifs
Nsl1	202.512	-0.305558	0.121523	-2.5144	0.00480001	NSL1, MIS12 kinetochore complex component
Elovl6	2748.31	-0.288672	0.114836	-2.51378	0.00480823	ELOVL family member 6, elongation of long chain fatty acids (yeast)
2210011K15Rik	82.3743	-0.390664	0.155453	-2.51307	0.00481941	RIKEN cDNA 2210011K15 gene
Crbn	888.531	0.319209	0.127067	2.51213	0.00483828	cereblon
Rpl28	176.86	-0.293621	0.117028	-2.50898	0.00493001	ribosomal protein L28
Ifit1	1644.19	0.28184	0.112385	2.50781	0.00495711	interferon-induced protein with tetratricopeptide repeats 1
Gins1	171.827	-0.323142	0.128957	-2.50581	0.0050119	GINS complex subunit 1 (Psf1 homolog)
Kcnh8	4.76032	0.359154	0.143349	2.50545	0.0050119	potassium voltage-gated channel, subfamily H (eag-related), member 8
Ighv7-1	9.39965	-0.220403	0.0880083	-2.50435	0.00503711	immunoglobulin heavy variable 7-1
Nucb2	401.261	-0.329014	0.131481	-2.50237	0.00509235	nucleobindin 2
Tnfsf13	50.9804	-0.360537	0.144119	-2.50167	0.00510397	tumor necrosis factor (ligand) superfamily, member 13
Tubb4b	5579.97	-0.240117	0.0960524	-2.49985	0.00513062	tubulin, beta 4B class IVB
Gm12857	7.09011	-0.275895	0.110382	-2.49945	0.00513062	ribosomal protein S5 pseudogene
Cops7a	2639.25	-0.152714	0.0610756	-2.5004	0.00513062	COP9 signalosome subunit 7A
Poc1a	295.056	-0.253596	0.101459	-2.49948	0.00513062	POC1 centriolar protein A
Nars2	359.42	-0.210466	0.08425	-2.49811	0.00516481	asparaginyl-tRNA synthetase 2 (mitochondrial)(putative)
Hirip3	805.625	-0.269497	0.108013	-2.49504	0.00526004	HIRA interacting protein 3
Angpt2	155.253	0.378902	0.151908	2.49428	0.00526178	angiopoietin 2
Adarb1	95.5335	0.376764	0.151047	2.49436	0.00526178	adenosine deaminase, RNA-specific, B1
Gm11185	7.50185	-0.297895	0.119525	-2.49233	0.00531317	glyceraldehyde-3-phosphate dehydrogenase pseudogene
Samd1	739.101	-0.177336	0.0711588	-2.49212	0.00531317	sterile alpha motif domain containing 1
Prmt1	1789.66	-0.244014	0.0979353	-2.49158	0.0053198	protein arginine N-methyltransferase 1
Bcl9l	1438.89	0.230697	0.0926054	2.49118	0.00532143	B cell CLL/lymphoma 9-like
Ptma	1626.69	-0.233159	0.0936267	-2.4903	0.00532442	prothymosin alpha
Lbx2	2.97988	-0.325082	0.130542	-2.49025	0.00532442	ladybird homeobox homolog 2 (Drosophila)
Wipf2	2187.37	0.250803	0.100722	2.49005	0.00532442	WAS/WASL interacting protein family, member 2
Pcdhb4	9.74531	0.395931	0.159223	2.48665	0.00543443	protocadherin beta 4
Grpel1	1675.17	-0.218787	0.0880146	-2.48581	0.00545232	GrpE-like 1, mitochondrial
Gm5070	8.7402	-0.314117	0.126387	-2.48536	0.00545585	ribosomal protein S2 pseudogene
2018-09-10	289.624	0.220841	0.0889069	2.48395	0.0054948	septin 10
Ddx60	805.73	0.296024	0.119201	2.4834	0.00550253	DEAD (Asp-Glu-Ala-Asp) box polypeptide 60
Kifc5b	133.57	-0.296672	0.119489	-2.48283	0.00551074	kinesin family member C5B
Lamtor2	1067.54	-0.214416	0.0864332	-2.48071	0.0055419	late endosomal/lysosomal adaptor, MAPK and MTOR activator 2
Sae1	2179.63	-0.195716	0.0789312	-2.47958	0.0055419	SUMO1 activating enzyme subunit 1
Rrm1	2010.87	-0.214084	0.0863439	-2.47943	0.0055419	ribonucleotide reductase M1
Ccr4	18.5973	-0.309082	0.124567	-2.48126	0.0055419	chemokine (C-C motif) receptor 4
Zmym2	1108.82	0.243651	0.0982766	2.47924	0.0055419	zinc finger, MYM-type 2
Cfp	281.777	-0.250181	0.100889	-2.47976	0.0055419	complement factor properdin
Slc25a43	10.1348	-0.392786	0.15833	-2.4808	0.0055419	solute carrier family 25, member 43
Gm6368	112.709	-0.358537	0.14458	-2.47984	0.0055419	heat shock protein 90 alpha (cytosolic), class B member 1 pseudogene
Tk1	803.632	-0.243801	0.0983791	-2.47818	0.00555615	thymidine kinase 1
Rgcc	206.298	0.309158	0.124748	2.47826	0.00555615	regulator of cell cycle
Cox6a1	7404	-0.243548	0.0983	-2.4776	0.00556498	cytochrome c oxidase subunit VIa polypeptide 1
Tbc1d15	1701.01	0.227366	0.0918271	2.47603	0.0056112	TBC1 domain family, member 15
B3gnt7	704.32	-0.38192	0.15427	-2.47567	0.0056121	UDP-GlcNAc:betaGal beta-1,3-N-acetylglucosaminyltransferase 7
Mcm3	1508.18	-0.274055	0.110746	-2.47463	0.00563017	minichromosome maintenance complex component 3
Lztr1	1769.81	-0.146994	0.059403	-2.47451	0.00563017	leucine-zipper-like transcriptional regulator, 1
Commd1	494.84	-0.163861	0.0662628	-2.47289	0.00564907	COMM domain containing 1
Fam84b	1673.65	0.209178	0.0845735	2.47332	0.00564907	family with sequence similarity 84, member B
Slc22a3	57.967	0.392913	0.158902	2.47267	0.00564907	solute carrier family 22 (organic cation transporter), member 3
Ifit3b	86.2062	0.270421	0.109346	2.47307	0.00564907	interferon-induced protein with tetratricopeptide repeats 3B
Mtfr2	101.214	-0.286601	0.116027	-2.47012	0.00573345	mitochondrial fission regulator 2
Hlf	254.357	0.373161	0.1511	2.46963	0.00573928	hepatic leukemia factor
Prpf39	921.482	0.24591	0.0996165	2.46856	0.0057676	pre-mRNA processing factor 39
Crkl	1287.41	0.251289	0.101819	2.46801	0.00577627	v-crk avian sarcoma virus CT10 oncogene homolog-like
Vps35	3388.91	0.125119	0.0507311	2.46632	0.00581574	VPS35 retromer complex component
Rrm2	690.386	-0.360138	0.146006	-2.46659	0.00581574	ribonucleotide reductase M2
Asna1	1563.82	-0.170484	0.0691346	-2.46598	0.00581639	arsA arsenite transporter, ATP-binding, homolog 1 (bacterial)
Prdx3	2183.37	-0.190333	0.0772161	-2.46494	0.00584397	peroxiredoxin 3
Paip1	1320.14	0.163843	0.0665211	2.46303	0.00590594	polyadenylate binding protein-interacting protein 1
Mmp7	3101.87	-0.370427	0.150454	-2.46206	0.00593106	matrix metallopeptidase 7
Fancg	283.131	-0.243521	0.0989588	-2.46083	0.0059668	Fanconi anemia, complementation group G
Ccnjl	284.659	-0.243959	0.0991828	-2.45969	0.00599904	cyclin J-like
Vps45	381.13	-0.281815	0.114591	-2.4593	0.00600156	vacuolar protein sorting 45
Uqcc2	630.076	-0.282761	0.115061	-2.45749	0.00606113	ubiquinol-cytochrome c reductase complex assembly factor 2
Pecr	331.772	-0.228486	0.0930828	-2.45465	0.0060936	peroxisomal trans-2-enoyl-CoA reductase
Abcb8	1681.2	-0.229404	0.0934774	-2.45411	0.0060936	ATP-binding cassette, sub-family B (MDR/TAP), member 8
Akr1c14	2060.96	0.379013	0.154439	2.45413	0.0060936	aldo-keto reductase family 1, member C14
Hnrnpc	3166.47	-0.169739	0.0691601	-2.45428	0.0060936	heterogeneous nuclear ribonucleoprotein C
Bysl	579.762	-0.217763	0.0886612	-2.45612	0.0060936	bystin-like
Mrpl21	706.124	-0.248675	0.101292	-2.45503	0.0060936	mitochondrial ribosomal protein L21
Rnaseh2c	393.306	-0.308437	0.125619	-2.45533	0.0060936	ribonuclease H2, subunit C
1700017D01Rik	4.64952	0.329804	0.134315	2.45546	0.0060936	RIKEN cDNA 1700017D01 gene
Ube2c	1576.54	-0.298393	0.121689	-2.45209	0.00615098	ubiquitin-conjugating enzyme E2C
Mrps21	515.397	-0.22892	0.0933827	-2.45142	0.00615098	mitochondrial ribosomal protein S21
Gm42532	34.4998	0.36308	0.148129	2.45111	0.00615098	NA
Noc4l	931.283	-0.231809	0.0945608	-2.45143	0.00615098	NOC4 like
Ydjc	581.77	-0.254253	0.103699	-2.45183	0.00615098	YdjC homolog (bacterial)
Ndufa13	2538.6	-0.231915	0.0946418	-2.45045	0.00616489	NADH dehydrogenase (ubiquinone) 1 alpha subcomplex, 13
Rnf32	412.826	0.337649	0.137863	2.44916	0.0061924	ring finger protein 32
Ift22	268.385	-0.342204	0.139742	-2.44883	0.0061924	intraflagellar transport 22
Igkv1-131	3.02721	-0.268631	0.109687	-2.44907	0.0061924	immunoglobulin kappa variable 1-131
S1pr1	364.474	0.263943	0.1078	2.44846	0.00619465	sphingosine-1-phosphate receptor 1
Spef1	404.002	-0.276823	0.11312	-2.44716	0.0062353	sperm flagellar 1
Tmem54	4155.76	-0.317061	0.129614	-2.4462	0.00625999	transmembrane protein 54
Gm5602	65.3682	0.38369	0.156868	2.44594	0.00625999	predicted gene 5602
Bmp2	1166.52	0.305874	0.125085	2.44532	0.00627244	bone morphogenetic protein 2
Sp3	1878.88	0.191517	0.0783383	2.44475	0.00628341	trans-acting transcription factor 3
Cib1	3820.09	-0.207355	0.0848728	-2.44312	0.00633814	calcium and integrin binding 1 (calmyrin)
Emc8	807.739	-0.171103	0.0700472	-2.44268	0.00634372	ER membrane protein complex subunit 8
Ighv4-1	1.87828	-0.227116	0.0930273	-2.4414	0.00638468	immunoglobulin heavy variable 4-1
Dguok	427.47	-0.175984	0.0720991	-2.44087	0.00639385	deoxyguanosine kinase
Pdgfa	1171.25	0.228637	0.0937573	2.43861	0.00646361	platelet derived growth factor, alpha
Tubg1	527.327	-0.275752	0.11307	-2.43877	0.00646361	tubulin, gamma 1
Spata5	265.585	-0.219817	0.0901832	-2.43745	0.00648657	spermatogenesis associated 5
Igkv1-132	30.2674	-0.341523	0.140103	-2.43765	0.00648657	immunoglobulin kappa variable 1-132
Gal3st2	455.811	0.385365	0.158156	2.43662	0.00650923	galactose-3-O-sulfotransferase 2
Cct7	4262.79	-0.195502	0.0802659	-2.43568	0.00652347	chaperonin containing Tcp1, subunit 7 (eta)
Cmc2	290.779	-0.288895	0.1186	-2.43588	0.00652347	COX assembly mitochondrial protein 2
Il2rg	89.3739	-0.381965	0.156872	-2.43489	0.00654426	interleukin 2 receptor, gamma chain
Uros	336.438	-0.238969	0.0981614	-2.43445	0.0065501	uroporphyrinogen III synthase
Rpn1	7386.97	-0.243327	0.100013	-2.43294	0.00660198	ribophorin I
Gm20730	8.27782	-0.286328	0.117729	-2.43209	0.00662613	NA
Pcbd2	194.459	-0.27631	0.113686	-2.43046	0.00668378	pterin 4 alpha carbinolamine dehydratase/dimerization cofactor of hepatocyte nuclear factor 1 alpha (TCF1) 2
Kdm4c	547.263	0.16584	0.0682864	2.4286	0.00675273	lysine (K)-specific demethylase 4C
Mrpl37	1594.32	-0.214984	0.088588	-2.42679	0.00675322	mitochondrial ribosomal protein L37
Mrpl10	1482.41	-0.192343	0.0792359	-2.42747	0.00675322	mitochondrial ribosomal protein L10
Ecd	909.298	-0.147553	0.0607954	-2.42704	0.00675322	ecdysoneless homolog (Drosophila)
Mbnl2	2788.61	0.24245	0.0998663	2.42775	0.00675322	muscleblind-like 2
Gsdmc2	941.845	-0.389522	0.160425	-2.42806	0.00675322	gasdermin C2
Kcnv2	7.62887	0.369486	0.152233	2.42711	0.00675322	potassium channel, subfamily V, member 2
Mmp13	147.074	-0.360005	0.148557	-2.42335	0.00689209	matrix metallopeptidase 13
Snf8	1110.42	-0.139113	0.0574113	-2.42308	0.00689209	SNF8, ESCRT-II complex subunit, homolog (S. cerevisiae)
Tmed3	1210.27	-0.248268	0.102475	-2.42271	0.00689553	transmembrane emp24 domain containing 3
Tmem50b	1246.13	-0.237098	0.0978827	-2.42227	0.00690205	transmembrane protein 50B
Sult1a1	240.553	0.357795	0.147774	2.42122	0.00693608	sulfotransferase family 1A, phenol-preferring, member 1
Steap2	172.116	-0.312345	0.129103	-2.41936	0.00700768	six transmembrane epithelial antigen of prostate 2
Trim30a	391.705	0.304865	0.126059	2.41843	0.00703666	tripartite motif-containing 30A
Ighg2b	20.7817	-0.348184	0.144012	-2.41775	0.00705449	immunoglobulin heavy constant gamma 2B
Gm10030	9.26479	0.360395	0.149099	2.41715	0.00706866	predicted gene 10030
Rpl41	1862.51	-0.223467	0.0925654	-2.41415	0.00719445	ribosomal protein L41
Clic4	2338.46	0.172839	0.0716502	2.41226	0.00726988	chloride intracellular channel 4 (mitochondrial)
Cops6	1847.09	-0.21353	0.088536	-2.41178	0.0072747	COP9 signalosome subunit 6
0610040F04Rik	10.5237	-0.346588	0.143719	-2.41157	0.0072747	RIKEN cDNA 0610040F04 gene
Snrnp40	359.931	-0.230985	0.0958086	-2.4109	0.0072924	small nuclear ribonucleoprotein 40 (U5)
Rtn4ip1	513.838	-0.277418	0.115138	-2.40944	0.00734087	reticulon 4 interacting protein 1
Zmym5	1166.69	0.236285	0.0980719	2.4093	0.00734087	zinc finger, MYM-type 5
Gk	4727.21	0.353125	0.146629	2.4083	0.00737513	glycerol kinase
Igtp	534.825	0.311067	0.129208	2.4075	0.00739964	interferon gamma induced GTPase
Ociad2	1873.31	-0.379699	0.157768	-2.4067	0.00742416	OCIA domain containing 2
Il12rb2	12.3103	-0.375942	0.156292	-2.40537	0.0074603	interleukin 12 receptor, beta 2
Traip	222.384	-0.289292	0.120259	-2.40556	0.0074603	TRAF-interacting protein
Ugt1a6b	7.50759	0.367902	0.153032	2.40409	0.00750872	UDP glucuronosyltransferase 1 family, polypeptide A6B
Gm16215	3.76562	0.27198	0.113173	2.40323	0.00753654	proteasome (prosome, macropain) 26S subunit, non-ATPase, 10 pseudogene
Lsm2	563.924	-0.259062	0.107836	-2.40238	0.00756436	LSM2 homolog, U6 small nuclear RNA and mRNA degradation associated
Polr2i	399.371	-0.230913	0.0961562	-2.40143	0.00758257	polymerase (RNA) II (DNA directed) polypeptide I
Tef	1990.06	0.384529	0.160113	2.40161	0.00758257	thyrotroph embryonic factor
Aff3	151.437	0.261	0.10877	2.39957	0.00760717	AF4/FMR2 family, member 3
Fam20b	4151.91	0.226191	0.0942735	2.3993	0.00760717	family with sequence similarity 20, member B
Sgms2	1708.52	0.312919	0.130404	2.39962	0.00760717	sphingomyelin synthase 2
Emp1	8450.04	0.361469	0.15069	2.39876	0.00760717	epithelial membrane protein 1
Rab39	10.0258	0.383362	0.159809	2.39888	0.00760717	RAB39, member RAS oncogene family
Vps26a	1953.99	0.214497	0.0893556	2.40049	0.00760717	VPS26 retromer complex component A
L3mbtl2	541.684	-0.191194	0.0797087	-2.39866	0.00760717	l(3)mbt-like 2 (Drosophila)
Trim36	259.118	0.246302	0.102642	2.39961	0.00760717	tripartite motif-containing 36
Cdc14a	560.601	0.312509	0.130322	2.39798	0.00762681	CDC14 cell division cycle 14A
Serinc2	2237.04	-0.228611	0.0953717	-2.39705	0.00765886	serine incorporator 2
Jmjd8	592.177	-0.198172	0.0827026	-2.3962	0.00768699	jumonji domain containing 8
Lmf1	427.195	-0.235782	0.098417	-2.39575	0.00769565	lipase maturation factor 1
Ndufs3	410.033	-0.239945	0.100224	-2.39409	0.00776464	NADH dehydrogenase (ubiquinone) Fe-S protein 3
Gm11214	1.07252	0.201035	0.0840045	2.39314	0.00779832	glyceraldehyde-3-phosphate dehydrogenase pseudogene
Ldha	19247.3	-0.207578	0.0867564	-2.39266	0.00780853	lactate dehydrogenase A
Gm13651	2.33413	0.278062	0.116253	2.39187	0.00783436	phosphoribosyl pyrophosphate synthetase-associated protein 2 pseudogene
Actc1	213.995	-0.380545	0.15918	-2.39065	0.00786773	actin, alpha, cardiac muscle 1
Kdm3a	1417.87	0.222602	0.0931115	2.39071	0.00786773	lysine (K)-specific demethylase 3A
Emc4	674.777	-0.207762	0.0869244	-2.39014	0.00787955	ER membrane protein complex subunit 4
Irgm1	1394.12	0.381621	0.159693	2.38972	0.007887	immunity-related GTPase family M member 1
Gstm5	591.918	-0.289621	0.121249	-2.38864	0.00791369	glutathione S-transferase, mu 5
Nol12	416.515	-0.2485	0.104034	-2.38864	0.00791369	nucleolar protein 12
Nagpa	525.93	-0.221774	0.0929069	-2.38705	0.00798112	N-acetylglucosamine-1-phosphodiester alpha-N-acetylglucosaminidase
Xbp1	6508.55	-0.238494	0.0999376	-2.38643	0.00798995	X-box binding protein 1
Synj1	1017.74	0.199426	0.0835702	2.38633	0.00798995	synaptojanin 1
AC125020.1	14.4439	-0.375808	0.157645	-2.38389	0.00810251	NA
Hn1	3525.76	-0.224723	0.0942838	-2.38348	0.00810954	hematological and neurological expressed sequence 1
Pycr2	479.536	-0.304942	0.127957	-2.38315	0.00811209	pyrroline-5-carboxylate reductase family, member 2
Pi16	22.612	0.353295	0.148309	2.38216	0.00814962	peptidase inhibitor 16
Dbp	576.648	0.354829	0.149106	2.37971	0.00826482	D site albumin promoter binding protein
Epc2	840.514	0.188238	0.0791275	2.37891	0.0082783	enhancer of polycomb homolog 2 (Drosophila)
Ctsc	2478.35	-0.235459	0.0989739	-2.379	0.0082783	cathepsin C
Zfp316	156.678	0.266057	0.111875	2.37816	0.00830371	zinc finger protein 316
Isg15	808.66	0.259644	0.109312	2.37526	0.0084307	ISG15 ubiquitin-like modifier
Ighv1-9	67.243	-0.326684	0.137531	-2.37535	0.0084307	immunoglobulin heavy variable V1-9
Josd2	533.043	-0.263504	0.110994	-2.37403	0.0084829	Josephin domain containing 2
Mnx1	88.3232	0.315419	0.133048	2.37071	0.00860551	motor neuron and pancreas homeobox 1
Gm45555	1.06728	0.173868	0.0733383	2.37076	0.00860551	NA
Fam96b	691.063	-0.204316	0.0861712	-2.37105	0.00860551	family with sequence similarity 96, member B
Nubp2	756.555	-0.164824	0.0695026	-2.37148	0.00860551	nucleotide binding protein 2
Gm20559	98.6315	0.370223	0.156192	2.37031	0.00861303	predicted gene, 20559
Atp5e	3665.44	-0.223731	0.0944686	-2.36831	0.00870904	ATP synthase, H+ transporting, mitochondrial F1 complex, epsilon subunit
Oas1f	8.67359	-0.359144	0.151682	-2.36775	0.00872538	2'-5' oligoadenylate synthetase 1F
Ccdc71	910.853	-0.121627	0.0513835	-2.36706	0.00874931	coiled-coil domain containing 71
Dnajc3	3624.16	-0.226578	0.0958198	-2.36462	0.00887143	DnaJ heat shock protein family (Hsp40) member C3
Prpf40b	417.555	-0.210977	0.0892555	-2.36374	0.00890644	pre-mRNA processing factor 40B
Ubiad1	773.874	-0.147502	0.0624097	-2.36344	0.00890827	UbiA prenyltransferase domain containing 1
Sgpp2	3556.79	-0.217837	0.0922327	-2.36182	0.00895517	sphingosine-1-phosphate phosphotase 2
Aurkaip1	1551.31	-0.166107	0.0703285	-2.36188	0.00895517	aurora kinase A interacting protein 1
Elf1	2490.25	0.278478	0.11789	2.36218	0.00895517	E74-like factor 1
Rad51	429.763	-0.254539	0.107814	-2.3609	0.00899277	RAD51 recombinase
Zswim1	183.867	-0.235816	0.0999875	-2.35845	0.00907036	zinc finger SWIM-type containing 1
Rhoc	3376.94	0.276599	0.117291	2.35823	0.00907036	ras homolog family member C
Wrap73	320.093	-0.221492	0.0938911	-2.35903	0.00907036	WD repeat containing, antisense to Trp73
Gm42918	8.55183	0.367632	0.155859	2.35874	0.00907036	NA
Lockd	60.8578	-0.352309	0.149393	-2.35827	0.00907036	lncRNA downstream of Cdkn1b
Gm10039	670.117	-0.276798	0.117394	-2.35785	0.00907721	ATP synthase, H+ transporting, mitochondrial F0 complex, subunit c, isoform 1 pseudogene
Rcc1	1459.75	-0.188657	0.0800348	-2.35719	0.00909071	regulator of chromosome condensation 1
Utp20	851.552	-0.175015	0.0742502	-2.35709	0.00909071	UTP20 small subunit processome component
Gnai3	6662.95	0.205279	0.0871207	2.35626	0.0090933	guanine nucleotide binding protein (G protein), alpha inhibiting 3
Rab37	205.528	0.378053	0.160422	2.35662	0.0090933	RAB37, member RAS oncogene family
Bop1	1693.54	-0.188833	0.08014	-2.35629	0.0090933	block of proliferation 1
Zdhhc3	2966.9	-0.181226	0.0769767	-2.3543	0.00919226	zinc finger, DHHC domain containing 3
Zfp341	171.8	-0.294232	0.125159	-2.35086	0.00938072	zinc finger protein 341
Atp5j2	2954.44	-0.233662	0.0995403	-2.34741	0.00955732	ATP synthase, H+ transporting, mitochondrial F0 complex, subunit F2
Mier3	644.938	0.316373	0.134764	2.34762	0.00955732	MIER family member 3
Rangap1	2615.25	-0.199867	0.0851837	-2.3463	0.00960054	RAN GTPase activating protein 1
Lbhd1	117.739	-0.263916	0.112487	-2.34618	0.00960054	LBH domain containing 1
Gbp2b	468.886	-0.35775	0.152527	-2.34549	0.00962718	guanylate binding protein 2b
Ifit1bl1	2762.44	0.282481	0.120517	2.34391	0.00970822	interferon induced protein with tetratricpeptide repeats 1B like 1
Rilpl2	488.663	-0.29182	0.124569	-2.34264	0.00977085	Rab interacting lysosomal protein-like 2
1700022I11Rik	1.94659	-0.25834	0.110349	-2.34111	0.00984966	RIKEN cDNA 1700022I11 gene
Gm5262	16.7076	-0.349081	0.149163	-2.34027	0.00985602	glyceraldehyde-3-phosphate dehydrogenase pseudogene
Gtdc1	198.08	0.27265	0.116514	2.34006	0.00985602	glycosyltransferase-like domain containing 1
Mecr	889.246	-0.189228	0.0808411	-2.34074	0.00985602	mitochondrial trans-2-enoyl-CoA reductase
Cuta	1220.56	-0.199889	0.0854234	-2.33998	0.00985602	cutA divalent cation tolerance homolog
Tkt	16553.1	-0.0831956	0.0355666	-2.33915	0.00989225	transketolase
Hpgd	4946.23	0.296224	0.126748	2.33711	0.0100047	hydroxyprostaglandin dehydrogenase 15 (NAD)
Serpinb9b	3.37442	0.212445	0.0909133	2.33679	0.0100086	serine (or cysteine) peptidase inhibitor, clade B, member 9b
D130007C19Rik	4.95876	0.341401	0.146148	2.33599	0.0100104	RIKEN cDNA D130007C19 gene
Il15	385.854	0.331681	0.141958	2.33647	0.0100104	interleukin 15
Tcf19	552.132	-0.296352	0.126854	-2.33616	0.0100104	transcription factor 19
Tram1	3127.25	-0.168132	0.0720576	-2.3333	0.0101666	translocating chain-associating membrane protein 1
Fars2	701.974	-0.206217	0.0883927	-2.33296	0.0101715	phenylalanine-tRNA synthetase 2 (mitochondrial)
Gins3	149.781	-0.290985	0.124747	-2.33261	0.0101777	GINS complex subunit 3 (Psf3 homolog)
Nxf7	152.513	-0.350171	0.150173	-2.33178	0.0102149	nuclear RNA export factor 7
Haus5	25.4247	-0.355948	0.152675	-2.33142	0.010222	HAUS augmin-like complex, subunit 5
Rnf128	7756.14	0.293269	0.125844	2.33042	0.0102703	ring finger protein 128
Naa38	354.487	-0.247785	0.106344	-2.33003	0.010279	N(alpha)-acetyltransferase 38, NatC auxiliary subunit
Btbd3	886.093	0.258032	0.1108	2.3288	0.0103428	BTB (POZ) domain containing 3
Gm12059	5.77821	-0.344575	0.148087	-2.32685	0.0104548	predicted gene 12059
Xrcc6	615.859	-0.235047	0.101041	-2.32626	0.0104771	X-ray repair complementing defective repair in Chinese hamster cells 6
Olfr665	4.84261	0.31903	0.137186	2.32554	0.0105082	olfactory receptor 665
Vldlr	193.806	0.268566	0.115507	2.3251	0.0105204	very low density lipoprotein receptor
Camkk1	235.832	-0.223383	0.0961205	-2.32398	0.0105779	calcium/calmodulin-dependent protein kinase kinase 1, alpha
Laptm5	634.981	-0.257852	0.111086	-2.32119	0.0107489	lysosomal-associated protein transmembrane 5
Mipep	531.229	-0.250789	0.108107	-2.31981	0.0108256	mitochondrial intermediate peptidase
Wdr37	542.869	0.232229	0.100149	2.31883	0.0108756	WD repeat domain 37
Cass4	19.2902	-0.369552	0.159473	-2.31733	0.0109444	Cas scaffolding protein family member 4
Gm44867	12.7075	0.343299	0.148142	2.31736	0.0109444	NA
Erp29	2332.47	-0.183166	0.0790825	-2.31613	0.0109993	endoplasmic reticulum protein 29
Tysnd1	1096.5	-0.245418	0.105967	-2.31599	0.0109993	trypsin domain containing 1
Nfkbia	1937.43	-0.292668	0.12638	-2.31579	0.0109993	nuclear factor of kappa light polypeptide gene enhancer in B cells inhibitor, alpha
Mrpl51	724.156	-0.24573	0.106208	-2.31367	0.0110805	mitochondrial ribosomal protein L51
Maml1	772.28	0.199097	0.086054	2.31362	0.0110805	mastermind like 1 (Drosophila)
Mrps7	1122.37	-0.230675	0.099701	-2.31366	0.0110805	mitchondrial ribosomal protein S7
Nars	6460.56	-0.191204	0.0826212	-2.31423	0.0110805	asparaginyl-tRNA synthetase
Zfp511	343.14	-0.23217	0.100431	-2.31174	0.011195	zinc finger protein 511
Erlec1	945.672	0.155998	0.0674952	2.31125	0.0112124	endoplasmic reticulum lectin 1
Gm16015	36.8605	-0.370509	0.160334	-2.31085	0.0112229	NA
Cotl1	3550.12	-0.220088	0.0952771	-2.30997	0.0112674	coactosin-like 1 (Dictyostelium)
Rpl28-ps1	40.4425	-0.338013	0.14636	-2.30946	0.0112864	ribosomal protein L28, pseudogene 1
Smyd5	598.849	-0.226019	0.0979148	-2.30832	0.01132	SET and MYND domain containing 5
Tsfm	602.401	-0.248934	0.107826	-2.30866	0.01132	Ts translation elongation factor, mitochondrial
Zfp692	694.846	-0.221691	0.0960428	-2.30825	0.01132	zinc finger protein 692
Vamp5	13.018	-0.370162	0.160417	-2.3075	0.011356	vesicle-associated membrane protein 5
Gm28884	8.41162	-0.349817	0.151671	-2.30642	0.0113852	NA
Lep	6.01139	0.167228	0.0725152	2.30611	0.0113852	leptin
Zdhhc2	427.165	-0.274862	0.119183	-2.30623	0.0113852	zinc finger, DHHC domain containing 2
Cnpy2	1268.55	-0.19503	0.0845605	-2.30639	0.0113852	canopy FGF signaling regulator 2
Ighv1-85	7.2414	-0.190188	0.0825236	-2.30466	0.0114722	immunoglobulin heavy variable 1-85
Cep120	640.45	0.19671	0.0853694	2.30423	0.0114858	centrosomal protein 120
Cdca8	1014.99	-0.24296	0.105469	-2.30361	0.0115128	cell division cycle associated 8
Cnnm1	145.142	0.262205	0.113865	2.30278	0.0115553	cyclin M1
Gm22711	5.07834	-0.334271	0.145208	-2.30202	0.0115926	NA
Lrrc45	1298.78	-0.135545	0.0588974	-2.30137	0.0116224	leucine rich repeat containing 45
Neil1	231.944	-0.219428	0.0954061	-2.29994	0.0116978	nei endonuclease VIII-like 1 (E. coli)
Prss41	12.1234	-0.365275	0.158825	-2.29985	0.0116978	protease, serine 41
Reg3b	257314	-0.287479	0.125039	-2.29911	0.0117348	regenerating islet-derived 3 beta
Gm45794	3.447	-0.294158	0.127958	-2.29887	0.0117348	NA
Tars	2408.38	-0.220774	0.0960901	-2.29757	0.0118122	threonyl-tRNA synthetase
Tomm40	1851.22	-0.274175	0.119403	-2.29621	0.0118956	translocase of outer mitochondrial membrane 40 homolog (yeast)
Sdhaf2	875.448	-0.153903	0.067045	-2.29552	0.011929	succinate dehydrogenase complex assembly factor 2
Gm11222	76.9548	-0.281908	0.122839	-2.29494	0.0119367	ribosomal protein L7-like 1 pseudogene
Cdt1	838.611	-0.252124	0.109854	-2.29509	0.0119367	chromatin licensing and DNA replication factor 1
Daglb	600.684	-0.279133	0.121649	-2.29457	0.0119463	diacylglycerol lipase, beta
Cdca5	373.901	-0.28073	0.122377	-2.29397	0.0119732	cell division cycle associated 5
Ptdss2	794.534	-0.146516	0.0638936	-2.29313	0.0120183	phosphatidylserine synthase 2
Nr2c2ap	84.2708	-0.273627	0.119375	-2.29216	0.012073	nuclear receptor 2C2-associated protein
Ascc1	474.972	-0.168944	0.0737306	-2.29137	0.012115	activating signal cointegrator 1 complex subunit 1
Ptges3l	39.46	-0.35841	0.156511	-2.29	0.0122005	prostaglandin E synthase 3 (cytosolic)-like
Phb	608.018	-0.246814	0.107821	-2.28911	0.0122142	prohibitin
Gm7765	8.32987	-0.321941	0.140637	-2.28916	0.0122142	glyceraldehyde-3-phosphate dehydrogenase pseudogene
Gm9843	279.969	-0.293783	0.128338	-2.28914	0.0122142	predicted gene 9843
Tcof1	1220.67	-0.232199	0.101467	-2.28843	0.0122484	treacle ribosome biogenesis factor 1
Pgls	1415.97	-0.190975	0.0834742	-2.28783	0.0122757	6-phosphogluconolactonase
Foxn3	1292.22	0.262585	0.11482	2.28692	0.0123276	forkhead box N3
Lbp	327.539	-0.366259	0.160195	-2.28633	0.0123549	lipopolysaccharide binding protein
AC125535.1	1.38353	0.195846	0.0857178	2.28478	0.0124565	NA
Gorasp1	689.594	-0.192646	0.0843294	-2.28445	0.0124636	golgi reassembly stacking protein 1
Ndufb6	827.346	-0.240106	0.105118	-2.28416	0.0124683	NADH dehydrogenase (ubiquinone) 1 beta subcomplex, 6
Polr2f	783.404	-0.194919	0.0853444	-2.28391	0.0124694	polymerase (RNA) II (DNA directed) polypeptide F
Pars2	219.511	-0.242855	0.106363	-2.28328	0.012482	prolyl-tRNA synthetase (mitochondrial)(putative)
Wnt11	19.7835	-0.365168	0.159917	-2.28349	0.012482	wingless-type MMTV integration site family, member 11
Car9	1130.26	-0.186638	0.0817546	-2.28291	0.0124929	carbonic anhydrase 9
Utp14b	474.152	0.362015	0.158602	2.28253	0.0124993	UTP14B small subunit processome component
Acvr1b	2549.8	0.171132	0.0749802	2.28236	0.0124993	activin A receptor, type 1B
Fam83c	119.719	-0.360302	0.157991	-2.28052	0.0126247	family with sequence similarity 83, member C
Atp5k	2349.16	-0.236986	0.103932	-2.28021	0.0126307	ATP synthase, H+ transporting, mitochondrial F1F0 complex, subunit E
Rev1	272.846	0.324586	0.142369	2.27989	0.0126376	REV1, DNA directed polymerase
Cyyr1	173.443	0.365499	0.160395	2.27875	0.0127091	cysteine and tyrosine-rich protein 1
Sema6d	1577.9	-0.230446	0.101157	-2.2781	0.0127424	sema domain, transmembrane domain (TM), and cytoplasmic domain, (semaphorin) 6D
Gm45104	5.98607	0.308901	0.135678	2.27672	0.0128231	NA
Slc11a2	1610.73	-0.143545	0.0630561	-2.27647	0.0128231	solute carrier family 11 (proton-coupled divalent metal ion transporters), member 2
Ppargc1b	297.479	-0.233339	0.102504	-2.27639	0.0128231	peroxisome proliferative activated receptor, gamma, coactivator 1 beta
4930471C06Rik	12.3893	0.343509	0.150977	2.27525	0.0128954	RIKEN cDNA 4930471C06 gene
Gm45763	6.06791	-0.334588	0.147106	-2.27446	0.0129401	NA
Gstm2	474.783	-0.251204	0.110464	-2.27409	0.0129515	glutathione S-transferase, mu 2
Gm12912	33.1636	-0.206874	0.090991	-2.27357	0.0129748	eukaryotic translation elongation factor 1 alpha 1 pseudogene
Pask	178.826	-0.259783	0.114334	-2.27215	0.0130707	PAS domain containing serine/threonine kinase
Ripk3	1418.5	-0.258441	0.113839	-2.27022	0.0132083	receptor-interacting serine-threonine kinase 3
Xaf1	302.374	0.334379	0.1474	2.26852	0.0133293	XIAP associated factor 1
Snx3	3296.82	-0.138052	0.060885	-2.26743	0.0134007	sorting nexin 3
Cacybp	1182.46	-0.184991	0.0816404	-2.26592	0.0134876	calcyclin binding protein
Cars2	541.671	-0.202919	0.0895446	-2.26612	0.0134876	cysteinyl-tRNA synthetase 2 (mitochondrial)(putative)
Sgk3	411.281	0.352438	0.155616	2.26479	0.0135035	serum/glucocorticoid regulated kinase 3
Zc3h12a	708.353	-0.339728	0.150032	-2.26437	0.0135035	zinc finger CCCH type containing 12A
Fignl1	407.583	-0.247013	0.109052	-2.26509	0.0135035	fidgetin-like 1
Irgm2	607.803	0.340422	0.150284	2.26519	0.0135035	immunity-related GTPase family M member 2
Txn2	3328.35	-0.241003	0.106426	-2.26451	0.0135035	thioredoxin 2
Tbccd1	577.809	-0.222026	0.0980313	-2.26485	0.0135035	TBCC domain containing 1
Gm18848	10.9703	-0.184008	0.0812894	-2.26361	0.0135481	glyceraldehyde-3-phosphate dehydrogenase pseudogene
Actn2	24.9041	-0.335579	0.148291	-2.26298	0.0135823	actinin alpha 2
Tor3a	465.276	0.323221	0.142882	2.26215	0.0136137	torsin family 3, member A
Fkbp2	1141.08	-0.197759	0.0874145	-2.26231	0.0136137	FK506 binding protein 2
Proser3	204.666	-0.212893	0.0941506	-2.2612	0.0136387	proline and serine rich 3
Zfp944	319.422	0.283694	0.125455	2.26132	0.0136387	zinc finger protein 944
Tspo2	19.2571	-0.360263	0.159326	-2.26118	0.0136387	translocator protein 2
Cenpa	1005.68	-0.254446	0.112567	-2.26039	0.0136862	centromere protein A
Dnajc9	618.553	-0.216952	0.0960239	-2.25936	0.0137543	DnaJ heat shock protein family (Hsp40) member C9
Tgfbi	6412.67	0.167231	0.0740388	2.25869	0.0137922	transforming growth factor, beta induced
Pacsin2	4132.85	0.17765	0.0786723	2.2581	0.0138237	protein kinase C and casein kinase substrate in neurons 2
Gm5431	177.252	0.255327	0.113124	2.25705	0.0138938	predicted gene 5431
Orai1	699.393	-0.242416	0.107442	-2.25626	0.013921	ORAI calcium release-activated calcium modulator 1
Rinl	92.0611	-0.317234	0.140614	-2.25606	0.013921	Ras and Rab interactor-like
Gm17909	8.48448	-0.281066	0.124578	-2.25615	0.013921	Y box protein 1 pseudogene
Dhx58	231.412	0.29132	0.129145	2.25577	0.0139274	DEXH (Asp-Glu-X-His) box polypeptide 58
Gm6136	26.5194	-0.361181	0.16019	-2.2547	0.0139623	ribosomal protein L6 pseudogene
Cnot8	915.884	-0.164385	0.0728971	-2.25503	0.0139623	CCR4-NOT transcription complex, subunit 8
Mmd	893.825	0.296908	0.131695	2.25452	0.0139623	monocyte to macrophage differentiation-associated
Aldh6a1	662.598	0.228571	0.101395	2.25425	0.0139623	aldehyde dehydrogenase family 6, subfamily A1
Dusp9	49.0871	0.361621	0.160416	2.25427	0.0139623	dual specificity phosphatase 9
Mrpl11	722.759	-0.223336	0.0990873	-2.25393	0.0139714	mitochondrial ribosomal protein L11
Ypel5	1374.44	0.306084	0.135818	2.25363	0.0139778	yippee-like 5 (Drosophila)
Zfp428	72.7291	-0.292057	0.129611	-2.25334	0.0139838	zinc finger protein 428
Bnip3	38.9791	0.3578	0.158962	2.25085	0.0141615	BCL2/adenovirus E1B interacting protein 3
Snai3	8.56818	-0.339522	0.150837	-2.25092	0.0141615	snail family zinc finger 3
Cfl1	10604.8	-0.147042	0.0653512	-2.25003	0.0142136	cofilin 1, non-muscle
Man2b2	1672.46	0.21757	0.0967061	2.24981	0.0142136	mannosidase 2, alpha B2
Mmrn1	834.083	0.300697	0.133749	2.24821	0.0143341	multimerin 1
Crlf1	9.19966	-0.350169	0.155819	-2.24727	0.0143977	cytokine receptor-like factor 1
Narfl	610.092	-0.176604	0.0786174	-2.24637	0.0144584	nuclear prelamin A recognition factor-like
Babam1	1659.6	-0.161539	0.0719299	-2.24578	0.0144906	BRISC and BRCA1 A complex member 1
Canx	14001.2	-0.172149	0.0766642	-2.2455	0.0144965	calnexin
Cul1	2642.6	0.115533	0.0514855	2.24398	0.0144967	cullin 1
Kcne3	1933.37	-0.144615	0.064437	-2.24428	0.0144967	potassium voltage-gated channel, Isk-related subfamily, gene 3
Dhx58os	4.98155	0.258675	0.115273	2.24402	0.0144967	DEAH (Asp-Glu-Ala-His) box polypeptide 58, opposite strand
Ktn1	1248.53	0.185858	0.082806	2.24449	0.0144967	kinectin 1
Zfp947	33.4993	0.339225	0.151169	2.24402	0.0144967	zinc finger protein 947
Pgp	1244.2	-0.220604	0.0982976	-2.24424	0.0144967	phosphoglycolate phosphatase
Vcp-rs	1352.43	-0.191235	0.0851964	-2.24463	0.0144967	valosin containing protein, related sequence
Pafah2	1209.63	-0.279053	0.124412	-2.24298	0.0145089	platelet-activating factor acetylhydrolase 2
AC132474.1	25.3971	0.359702	0.16035	2.24322	0.0145089	NA
Ldah	1411.9	-0.277106	0.12354	-2.24304	0.0145089	lipid droplet associated hydrolase
Copz1	5013.63	-0.218733	0.0974968	-2.24349	0.0145089	coatomer protein complex, subunit zeta 1
Ptpmt1	37.8611	-0.346718	0.154701	-2.24121	0.0145524	protein tyrosine phosphatase, mitochondrial 1
Tomm5	398.495	-0.261123	0.116506	-2.24129	0.0145524	translocase of outer mitochondrial membrane 5 homolog (yeast)
Guca2a	15247.6	0.291092	0.129881	2.24123	0.0145524	guanylate cyclase activator 2a (guanylin)
Lcorl	751.589	0.252567	0.112663	2.24179	0.0145524	ligand dependent nuclear receptor corepressor-like
Gns	2500.83	0.169265	0.0755189	2.24136	0.0145524	glucosamine (N-acetyl)-6-sulfatase
Gspt1	2771.28	-0.13723	0.06122	-2.24159	0.0145524	G1 to S phase transition 1
Gm10069	18.1766	-0.355754	0.158767	-2.24073	0.0145757	predicted gene 10069
Fam229a	1.78395	-0.242277	0.108275	-2.23761	0.0147494	family with sequence similarity 229, member A
Usp12	3070.63	0.230114	0.102833	2.23775	0.0147494	ubiquitin specific peptidase 12
4930435C17Rik	6.04556	0.329308	0.147194	2.23723	0.0147494	RIKEN cDNA 4930435C17 gene
Cope	3598.32	-0.219747	0.0982286	-2.2371	0.0147494	coatomer protein complex, subunit epsilon
Haus8	305.619	-0.305733	0.136584	-2.23843	0.0147494	4HAUS augmin-like complex, subunit 8
Psmd3	3603.26	-0.213996	0.0956199	-2.23798	0.0147494	proteasome (prosome, macropain) 26S subunit, non-ATPase, 3
E230001N04Rik	46.4765	0.332148	0.148467	2.23718	0.0147494	RIKEN cDNA E230001N04 gene
Zfp397	810.204	0.236085	0.105488	2.23803	0.0147494	zinc finger protein 397
Coa3	1669	-0.23159	0.103561	-2.23627	0.0148053	cytochrome C oxidase assembly factor 3
Gm15550	1.00258	0.147632	0.066027	2.23593	0.014817	5-aminoimidazole-4-carboxamide ribonucleotide formyltransferase/IMP cyclohydrolase pseudogene
Abcb1b	40.09	0.358505	0.160418	2.23482	0.0148793	ATP-binding cassette, sub-family B (MDR/TAP), member 1B
Suclg2	590.391	0.145177	0.0649565	2.23499	0.0148793	succinate-Coenzyme A ligase, GDP-forming, beta subunit
Magi3	1880.19	0.276778	0.123921	2.23351	0.0149111	membrane associated guanylate kinase, WW and PDZ domain containing 3
Zgrf1	234.621	-0.284282	0.127272	-2.23367	0.0149111	zinc finger, GRF-type containing 1
E2f2	1564.71	-0.287305	0.128619	-2.23376	0.0149111	E2F transcription factor 2
Klf13	2064.56	0.195514	0.0875368	2.2335	0.0149111	Kruppel-like factor 13
Derl3	35.8788	-0.357456	0.160049	-2.23342	0.0149111	Der1-like domain family, member 3
Oas1a	404.984	0.267511	0.119816	2.23268	0.0149401	2'-5' oligoadenylate synthetase 1A
Gm12251	37.9595	-0.348494	0.156077	-2.23283	0.0149401	NADH dehydrogenase (ubiquinone) Fe-S protein 3 pseudogene
Tmem176a	3474.7	-0.194409	0.0870921	-2.23222	0.0149608	transmembrane protein 176A
Serpina3c	12.5155	0.238448	0.10683	2.23204	0.0149608	serine (or cysteine) peptidase inhibitor, clade A, member 3C
Ppm1m	218.287	-0.260143	0.116593	-2.2312	0.0150183	protein phosphatase 1M
Mrps18a	890.254	-0.191256	0.0857815	-2.22957	0.0151484	mitochondrial ribosomal protein S18A
Ifrd2	1336.21	-0.211796	0.0950124	-2.22914	0.0151695	interferon-related developmental regulator 2
Spcs3	1908.26	-0.183778	0.0824621	-2.22864	0.0151961	signal peptidase complex subunit 3 homolog (S. cerevisiae)
Cenpq	225.239	-0.230305	0.103385	-2.22765	0.0152683	centromere protein Q
Entpd6	765.655	-0.213831	0.0960268	-2.22678	0.0153112	ectonucleoside triphosphate diphosphohydrolase 6
Siglece	77.4527	-0.348013	0.156277	-2.2269	0.0153112	sialic acid binding Ig-like lectin E
Clgn	13.5464	-0.352303	0.158244	-2.22632	0.0153343	calmegin
Mrpl45	863.378	-0.220186	0.0989129	-2.22606	0.0153401	mitochondrial ribosomal protein L45
Cops9	687.143	-0.222638	0.100028	-2.22574	0.0153416	NA
Tmem151a	81.4461	0.339053	0.152341	2.22563	0.0153416	transmembrane protein 151A
E2f8	750.413	-0.275839	0.123971	-2.22503	0.0153781	E2F transcription factor 8
Csnk1g3	1545.34	0.140455	0.0631649	2.22363	0.01549	casein kinase 1, gamma 3
Arid5b	918.801	0.280741	0.126332	2.22225	0.015601	AT rich interactive domain 5B (MRF1-like)
Eme1	171.827	-0.293378	0.132058	-2.22158	0.0156416	essential meiotic structure-specific endonuclease 1
Trp63	2.55058	0.222084	0.0999746	2.22141	0.0156416	transformation related protein 63
Zfp758	202.133	0.317568	0.143041	2.22012	0.0157447	zinc finger protein 758
Rpn2	8688.97	-0.200332	0.0902608	-2.21948	0.0157861	ribophorin II
Tubb1	2.39404	-0.185012	0.0834207	-2.21782	0.0159261	tubulin, beta 1 class VI
Irf3	1878.01	-0.156337	0.070506	-2.21736	0.0159511	interferon regulatory factor 3
Sugct	133.614	0.35467	0.160005	2.21662	0.0159824	succinyl-CoA glutarate-CoA transferase
Tmem63b	1853.1	0.140847	0.0635411	2.21663	0.0159824	transmembrane protein 63b
Mrps26	719.937	-0.262169	0.118321	-2.21575	0.0160476	mitochondrial ribosomal protein S26
Clec4n	156.188	-0.271538	0.122578	-2.21522	0.0160618	C-type lectin domain family 4, member n
Gm44507	2.3374	-0.222714	0.100539	-2.2152	0.0160618	NA
Gm22567	1.63821	-0.172635	0.0779625	-2.21433	0.0161261	NA
Slc6a7	353.635	0.27341	0.123496	2.21392	0.0161466	solute carrier family 6 (neurotransmitter transporter, L-proline), member 7
Mien1	624.795	-0.220132	0.0994448	-2.21361	0.0161574	migration and invasion enhancer 1
Gm5822	18.7599	-0.354518	0.160299	-2.2116	0.0163343	eukaryotic translation elongation factor 1 alpha 1 pseudogene
Mrpl44	638.948	-0.2013	0.0910352	-2.21123	0.0163355	mitochondrial ribosomal protein L44
Gm19950	3.27129	-0.242494	0.109667	-2.21118	0.0163355	predicted gene, 19950
Rab11fip5	378.196	0.347731	0.15729	2.21076	0.0163377	RAB11 family interacting protein 5 (class I)
Gm12152	6.59576	-0.18179	0.0822298	-2.21076	0.0163377	predicted gene 12152
Dyrk2	3136.85	0.315121	0.142597	2.20988	0.0164051	dual-specificity tyrosine-(Y)-phosphorylation regulated kinase 2
Gm3667	2.31429	0.237294	0.10739	2.20965	0.0164074	predicted gene 3667
Ints3	2214.77	-0.164644	0.0745596	-2.20823	0.0165034	integrator complex subunit 3
Tnni3	12.3948	-0.353459	0.160088	-2.2079	0.0165034	troponin I, cardiac 3
Cdk13	1705.57	0.151283	0.0685196	2.20788	0.0165034	cyclin-dependent kinase 13
Fam167a	28.3082	-0.324749	0.147076	-2.20803	0.0165034	family with sequence similarity 167, member A
Prkg2	1519.81	0.285179	0.12923	2.20677	0.0165748	protein kinase, cGMP-dependent, type II
Smco4	323.261	-0.250281	0.113412	-2.20683	0.0165748	single-pass membrane protein with coiled-coil domains 4
Cers6	3862.83	0.260616	0.118172	2.20539	0.0166774	ceramide synthase 6
Eno3	675.91	-0.21563	0.0977761	-2.20534	0.0166774	enolase 3, beta muscle
Npy	74.8848	-0.352043	0.159659	-2.20497	0.0166945	neuropeptide Y
Tex2	1316.29	-0.215641	0.0978351	-2.20413	0.0167593	testis expressed gene 2
Oasl2	2044.34	0.272146	0.123537	2.20295	0.0168586	2'-5' oligoadenylate synthetase-like 2
Tmem261	543.849	-0.202718	0.0920406	-2.20248	0.0168654	transmembrane protein 261
Cdc37	3132.16	-0.164097	0.0745005	-2.20263	0.0168654	cell division cycle 37
Ska2	195.771	-0.288216	0.130935	-2.20122	0.0169735	spindle and kinetochore associated complex subunit 2
Ube2s	295.68	-0.21416	0.0973276	-2.2004	0.017037	ubiquitin-conjugating enzyme E2S
Ighj4	3.69434	-0.292239	0.132848	-2.1998	0.0170583	immunoglobulin heavy joining 4
Ly6d	47.3814	-0.267652	0.12166	-2.19999	0.0170583	lymphocyte antigen 6 complex, locus D
Arl13b	470.256	0.323813	0.147228	2.1994	0.0170789	ADP-ribosylation factor-like 13B
Gm15653	3.74453	-0.20853	0.0948308	-2.19897	0.0171029	predicted gene 15653
Cc2d2a	365.664	0.245179	0.111554	2.19786	0.0171854	coiled-coil and C2 domain containing 2A
Dnmbp	3926.9	0.199606	0.0908216	2.19778	0.0171854	dynamin binding protein
Hdhd5	330.199	-0.233887	0.106437	-2.19742	0.0172014	NA
Masp2	36.1953	-0.33394	0.152017	-2.19673	0.0172357	mannan-binding lectin serine peptidase 2
Dctpp1	558.489	-0.248704	0.113217	-2.1967	0.0172357	dCTP pyrophosphatase 1
Jchain	466.247	-0.346624	0.15788	-2.19549	0.017341	immunoglobulin joining chain
Hpd	318.302	-0.262001	0.119368	-2.19489	0.0173825	4-hydroxyphenylpyruvic acid dioxygenase
Wdr26	3081.46	0.179719	0.0819068	2.19419	0.017435	WD repeat domain 26
Ndufv3	2105.41	-0.211155	0.0962433	-2.19397	0.0174377	NADH dehydrogenase (ubiquinone) flavoprotein 3
Grwd1	531.774	-0.21702	0.0989281	-2.19372	0.0174442	glutamate-rich WD repeat containing 1
Rdh16	109.99	-0.344274	0.156969	-2.19325	0.0174542	retinol dehydrogenase 16
Snrnp25	211.114	-0.272803	0.124384	-2.19323	0.0174542	small nuclear ribonucleoprotein 25 (U11/U12)
Xrn2	2063.39	0.162768	0.074236	2.19258	0.0174648	5'-3' exoribonuclease 2
Fa2h	29.1896	0.234476	0.106932	2.19275	0.0174648	fatty acid 2-hydroxylase
Cdk1	1540.84	-0.249929	0.113991	-2.19254	0.0174648	cyclin-dependent kinase 1
Gm8048	5.09737	-0.170973	0.0780082	-2.19173	0.0175299	glyceraldehyde-3-phosphate dehydrogenase pseudogene
Rabgap1	933.602	0.140097	0.0639493	2.19075	0.0175392	RAB GTPase activating protein 1
Mrpl46	670.029	-0.234335	0.106969	-2.19067	0.0175392	mitochondrial ribosomal protein L46
1600002K03Rik	145.077	-0.285126	0.13011	-2.19143	0.0175392	RIKEN cDNA 1600002K03 gene
Pick1	1005.75	-0.128944	0.058849	-2.19111	0.0175392	protein interacting with C kinase 1
Pisd-ps2	13.1445	-0.349799	0.159666	-2.19081	0.0175392	phosphatidylserine decarboxylase, pseudogene 2
Gm4262	19.9225	-0.3424	0.156339	-2.1901	0.0175626	predicted gene 4262
Eif2s3x	188.56	-0.27042	0.123476	-2.19006	0.0175626	eukaryotic translation initiation factor 2, subunit 3, structural gene X-linked
Tmem221	8.75983	-0.342329	0.156392	-2.18891	0.0176638	transmembrane protein 221
Cytip	258.387	0.349145	0.159529	2.1886	0.017676	cytohesin 1 interacting protein
Cry2	876.836	0.327359	0.149628	2.18782	0.0177383	cryptochrome 2 (photolyase-like)
Cad	1465.36	-0.215749	0.0986592	-2.18681	0.0177639	carbamoyl-phosphate synthetase 2, aspartate transcarbamylase, and dihydroorotase
Gm15796	10.9741	-0.343901	0.157227	-2.18728	0.0177639	predicted gene 15796
Cmtm7	252.527	-0.292298	0.133655	-2.18696	0.0177639	CKLF-like MARVEL transmembrane domain containing 7
Snrpc	317.478	-0.218734	0.100009	-2.18715	0.0177639	U1 small nuclear ribonucleoprotein C
Mfsd8	475.609	0.28229	0.129134	2.18601	0.0177725	major facilitator superfamily domain containing 8
Zdhhc7	2401.9	-0.172356	0.0788465	-2.18597	0.0177725	zinc finger, DHHC domain containing 7
Gm12258	209.953	0.183623	0.0839912	2.18622	0.0177725	predicted gene 12258
Stx3	2402.21	0.219039	0.100192	2.18619	0.0177725	syntaxin 3
Gm11942	511.721	-0.239588	0.109647	-2.18508	0.0178466	ribosomal protein, large, P1 pseudogene
Saa1	2991.72	-0.163837	0.0749935	-2.18468	0.0178488	serum amyloid A 1
Ssr4	2705.29	-0.212993	0.0974928	-2.1847	0.0178488	signal sequence receptor, delta
Washc2	1670.6	0.223128	0.102172	2.18385	0.017917	NA
Wdfy1	1360.03	0.247026	0.113201	2.18219	0.0180747	WD repeat and FYVE domain containing 1
Chaf1a	567.495	-0.231405	0.106059	-2.18186	0.0180905	chromatin assembly factor 1, subunit A (p150)
Ugt1a10	3.11114	-0.254409	0.116613	-2.18164	0.0180931	UDP glycosyltransferase 1 family, polypeptide A10
Lrrc37a	10.1863	-0.309249	0.141784	-2.18113	0.018128	leucine rich repeat containing 37A
Gm44616	35.4198	0.321742	0.147583	2.18007	0.0182139	NA
Fnip1	692.826	0.335792	0.154036	2.17996	0.0182139	folliculin interacting protein 1
Fam69a	222.063	0.202326	0.0928247	2.17966	0.0182261	family with sequence similarity 69, member A
Sptssb	31.0328	-0.344274	0.15799	-2.17908	0.0182661	serine palmitoyltransferase, small subunit B
Hbb-bh1	10.8746	-0.286459	0.131469	-2.17891	0.0182661	hemoglobin Z, beta-like embryonic chain
Cab39	6214.13	0.243059	0.111582	2.1783	0.0182968	calcium binding protein 39
Nhlrc2	847.678	0.261767	0.120173	2.17826	0.0182968	NHL repeat containing 2
Skap2	556.484	-0.284468	0.130646	-2.1774	0.0183496	src family associated phosphoprotein 2
Gm44751	83.5937	-0.319726	0.14683	-2.17751	0.0183496	NA
Mylip	548.173	0.313227	0.143868	2.17718	0.0183525	myosin regulatory light chain interacting protein
Rpl39l	3.03043	-0.187002	0.0859276	-2.17627	0.0184317	ribosomal protein L39-like
Zmynd10	8.35548	-0.336931	0.154836	-2.17605	0.0184353	zinc finger, MYND domain containing 10
Slc35c1	4484.82	-0.220849	0.101526	-2.17529	0.0184981	solute carrier family 35, member C1
Gm5270	7.99221	-0.225991	0.103922	-2.17463	0.0185509	glyceraldehyde-3-phosphate dehydrogenase pseudogene
Nop16	552.483	-0.191096	0.0878914	-2.17423	0.0185747	NOP16 nucleolar protein
Tat	264.09	-0.180088	0.0829452	-2.17117	0.0188946	tyrosine aminotransferase
Uap1l1	468.204	0.295106	0.135984	2.17014	0.0189678	UDP-N-acteylglucosamine pyrophosphorylase 1-like 1
Sash3	110.166	-0.337861	0.155681	-2.17021	0.0189678	SAM and SH3 domain containing 3
Dpm3	330.159	-0.229544	0.105808	-2.16943	0.0190269	dolichyl-phosphate mannosyltransferase polypeptide 3
Gadd45gip1	214.876	-0.252451	0.116414	-2.16857	0.0191033	growth arrest and DNA-damage-inducible, gamma interacting protein 1
Slc30a4	107.571	0.346917	0.160065	2.16735	0.0191646	solute carrier family 30 (zinc transporter), member 4
Nsmce1	675.448	-0.174868	0.0806805	-2.16742	0.0191646	NSE1 homolog, SMC5-SMC6 complex component
Fcho2	1548.78	0.26988	0.124522	2.16733	0.0191646	FCH domain only 2
Nedd8	1869.17	-0.198486	0.0915825	-2.16729	0.0191646	neural precursor cell expressed, developmentally down-regulated gene 8
Rpl13a	646.091	-0.233613	0.107852	-2.16606	0.0192418	ribosomal protein L13A
AW549877	1038.32	0.220021	0.101563	2.16635	0.0192418	expressed sequence AW549877
Yif1a	1663.28	-0.240155	0.110866	-2.16616	0.0192418	Yip1 interacting factor homolog A (S. cerevisiae)
Zhx3	874.723	0.26882	0.124147	2.16534	0.0192816	zinc fingers and homeoboxes 3
Zmat5	215.444	-0.236381	0.109161	-2.16544	0.0192816	zinc finger, matrin type 5
Aurkb	819.044	-0.254598	0.117602	-2.16492	0.0193083	aurora kinase B
Nhej1	104.356	-0.256509	0.118497	-2.16469	0.0193136	nonhomologous end-joining factor 1
1110008P14Rik	298.674	-0.267993	0.123824	-2.16431	0.0193297	RIKEN cDNA 1110008P14 gene
Nudc-ps1	101.616	-0.271612	0.125503	-2.16418	0.0193297	nuclear distribution gene C homolog (Aspergillus), pseudogene 1
Cd177	20.9651	-0.308306	0.142551	-2.16277	0.0193649	CD177 antigen
AC027700.1	60.9977	0.326001	0.150721	2.16295	0.0193649	NA
Hsf1	870.261	-0.225856	0.104407	-2.16322	0.0193649	heat shock factor 1
Cd74	4933.6	-0.281338	0.13007	-2.16297	0.0193649	CD74 antigen (invariant polypeptide of major histocompatibility complex, class II antigen-associated)
Rbp4	119.403	0.326292	0.150843	2.16313	0.0193649	retinol binding protein 4, plasma
Gm9436	5.80306	-0.235421	0.108808	-2.16365	0.0193649	heat shock protein 8 pseudogene
E2f4	1980.39	-0.138006	0.0638176	-2.16252	0.0193736	E2F transcription factor 4
Cryz	261.733	0.319358	0.147701	2.16219	0.0193897	crystallin, zeta
Eno1	1061.12	-0.253212	0.117172	-2.16103	0.0194601	enolase 1, alpha non-neuron
Exd2	520.043	-0.157458	0.0728578	-2.16117	0.0194601	exonuclease 3'-5' domain containing 2
Mgat3	4627.46	0.215418	0.0996784	2.16113	0.0194601	mannoside acetylglucosaminyltransferase 3
BC050972	2.33906	0.251023	0.116259	2.15918	0.019654	cDNA sequence BC050972
Glo1	744.179	-0.273792	0.12682	-2.15891	0.0196635	glyoxalase 1
3110040N11Rik	225.273	-0.223861	0.103706	-2.15861	0.0196777	RIKEN cDNA 3110040N11 gene
Gm14119	8.34535	-0.170173	0.0789008	-2.1568	0.019825	NA
H13	2487.6	-0.19255	0.0892687	-2.15697	0.019825	histocompatibility 13
Sirt6	472.351	-0.160284	0.0743118	-2.15691	0.019825	sirtuin 6
Lrrc9	2.13049	0.239281	0.110981	2.15605	0.0198924	leucine rich repeat containing 9
Cfhr2	6.86238	-0.297271	0.13789	-2.15585	0.0198942	complement factor H-related 2
Clca3a1	518.931	0.298933	0.138701	2.15523	0.0199459	chloride channel accessory 3A1
Spcs2	2233.33	-0.245333	0.113852	-2.15485	0.0199695	signal peptidase complex subunit 2 homolog (S. cerevisiae)
Gm11517	9.6677	-0.292381	0.135722	-2.15427	0.0200167	ubiquitin A-52 residue ribosomal protein fusion product 1 pseudogene
Cks1b	299.88	-0.272608	0.126621	-2.15294	0.0201528	CDC28 protein kinase 1b
Riox2	351.992	-0.17266	0.080214	-2.15249	0.0201639	NA
Banf1	2127.49	-0.236824	0.110016	-2.15264	0.0201639	barrier to autointegration factor 1
Pla2g4f	6.49736	-0.304592	0.141548	-2.15187	0.0202075	phospholipase A2, group IVF
Gpx2-ps1	6.6379	-0.292233	0.135811	-2.15176	0.0202075	glutathione peroxidase 2, pseudogene 1
2510002D24Rik	406.158	-0.203781	0.0947144	-2.15154	0.0202132	RIKEN cDNA 2510002D24 gene
Atic	1961.15	-0.211315	0.0982361	-2.15109	0.0202294	5-aminoimidazole-4-carboxamide ribonucleotide formyltransferase/IMP cyclohydrolase
Tfdp1	1323.8	-0.162462	0.0755273	-2.15104	0.0202294	transcription factor Dp 1
Sec61b	936.438	-0.280299	0.130405	-2.14945	0.0203766	Sec61 beta subunit
Tslp	10.3815	0.343822	0.159946	2.14961	0.0203766	thymic stromal lymphopoietin
Fubp3	1085.67	0.134142	0.0624329	2.14857	0.0204395	far upstream element (FUSE) binding protein 3
Tbrg4	2144.11	-0.189008	0.0879673	-2.14861	0.0204395	transforming growth factor beta regulated gene 4
Ihh	2321.53	0.257038	0.119664	2.148	0.0204864	Indian hedgehog
Tollip	3087.59	0.246028	0.114549	2.1478	0.0204891	toll interacting protein
Strn3	1110.38	0.20231	0.0942123	2.14739	0.0205177	striatin, calmodulin binding protein 3
Ap2s1	2247.11	-0.158673	0.0739009	-2.1471	0.020531	adaptor-related protein complex 2, sigma 1 subunit
Samd9l	1514.05	0.34122	0.159037	2.14555	0.0206906	sterile alpha motif domain containing 9-like
Lrrc25	71.7045	-0.281485	0.131228	-2.14502	0.0206906	leucine rich repeat containing 25
Jrkl	347.899	0.194437	0.0906316	2.14536	0.0206906	Jrk-like
CT025653.1	2.9862	0.267317	0.124629	2.1449	0.0206906	NA
Nme6	306.493	-0.228289	0.106427	-2.14504	0.0206906	NME/NM23 nucleoside diphosphate kinase 6
Mcm7	1289.19	-0.233487	0.108884	-2.14437	0.0207333	minichromosome maintenance complex component 7
Ptgdr2	4.21774	-0.285555	0.133226	-2.14338	0.020832	prostaglandin D2 receptor 2
Oas1b	109.908	0.260206	0.121411	2.14319	0.0208344	2'-5' oligoadenylate synthetase 1B
Gm43196	7.57592	0.300627	0.140289	2.14291	0.0208469	NA
Atpif1	3943.14	-0.216936	0.101275	-2.14206	0.0209302	ATPase inhibitory factor 1
Zfp771	227.352	-0.25785	0.120386	-2.14186	0.0209327	zinc finger protein 771
C77080	10840.9	0.223631	0.104424	2.14156	0.0209406	expressed sequence C77080
Mir6909	6.16256	0.327876	0.15311	2.14144	0.0209406	microRNA 6909
Zscan22	182.776	-0.221217	0.103336	-2.14075	0.0209824	zinc finger and SCAN domain containing 22
Cinp	526.176	-0.177676	0.0829951	-2.14081	0.0209824	cyclin-dependent kinase 2 interacting protein
Itpa	445.616	-0.192045	0.0897339	-2.14016	0.0210336	inosine triphosphatase (nucleoside triphosphate pyrophosphatase)
3110056K07Rik	202.264	0.238748	0.111569	2.13991	0.0210433	RIKEN cDNA 3110056K07 gene
Intu	123.297	-0.26919	0.125812	-2.13962	0.0210571	inturned planar cell polarity protein
Emc10	1781.66	-0.196103	0.0916753	-2.1391	0.0210993	ER membrane protein complex subunit 10
Snap47	455.818	-0.263327	0.123113	-2.13891	0.0211021	synaptosomal-associated protein, 47
Aurka	741.91	-0.27052	0.126488	-2.13871	0.0211053	aurora kinase A
Rras2	1074.73	0.195293	0.0913334	2.13824	0.0211195	related RAS viral (r-ras) oncogene 2
Gm26797	28.5477	0.333119	0.155789	2.13827	0.0211195	NA
Gm20753	1.51061	0.206657	0.0966593	2.138	0.0211267	predicted gene, 20753
Bmp2k	728.172	0.247012	0.115552	2.13766	0.0211267	BMP2 inducible kinase
Lmo3	34.2783	0.337605	0.157928	2.13771	0.0211267	LIM domain only 3
Rabl6	2020.79	-0.116202	0.0543806	-2.13683	0.0212084	RAB, member RAS oncogene family-like 6
Sf1	973.601	-0.127891	0.0598555	-2.13666	0.0212084	splicing factor 1
Bet1l	503.131	-0.194058	0.0908624	-2.13573	0.0212807	Bet1 golgi vesicular membrane trafficking protein like
Stard4	6735.6	0.220024	0.10302	2.13574	0.0212807	StAR-related lipid transfer (START) domain containing 4
Oas1g	240.496	0.238174	0.111557	2.13499	0.0213323	2'-5' oligoadenylate synthetase 1G
Uhrf1bp1l	1118.17	0.258119	0.120901	2.13497	0.0213323	UHRF1 (ICBP90) binding protein 1-like
Dars2	621.048	-0.237932	0.111456	-2.13475	0.0213379	aspartyl-tRNA synthetase 2 (mitochondrial)
Nampt	2027.33	0.2935	0.137502	2.13452	0.0213454	nicotinamide phosphoribosyltransferase
She	184.807	0.230265	0.107915	2.13377	0.021418	src homology 2 domain-containing transforming protein E
Dact2	874.542	0.219844	0.103046	2.13347	0.0214341	dishevelled-binding antagonist of beta-catenin 2
Rpl27a-ps1	1.82682	-0.176091	0.0825651	-2.13276	0.0215016	ribosomal protein L27A, pseudogene 1
Mogs	2249.06	-0.170437	0.0799325	-2.13226	0.0215427	mannosyl-oligosaccharide glucosidase
Adhfe1	20.0657	0.311654	0.1462	2.1317	0.021591	alcohol dehydrogenase, iron containing, 1
E2f1	287.312	-0.288017	0.135155	-2.131	0.0216251	E2F transcription factor 1
Gm16016	3.41353	0.280174	0.13148	2.13092	0.0216251	predicted gene 16016
Ercc6l	357.316	-0.234859	0.110211	-2.131	0.0216251	excision repair cross-complementing rodent repair deficiency complementation group 6 like
Lars2	739.931	-0.161301	0.0757495	-2.1294	0.0217955	leucyl-tRNA synthetase, mitochondrial
A730090N16Rik	4.45286	-0.300963	0.141357	-2.1291	0.021802	RIKEN cDNA A730090N16 gene
C1qa	1086.13	-0.224994	0.10568	-2.12901	0.021802	complement component 1, q subcomponent, alpha polypeptide
Focad	275.735	-0.188121	0.0883764	-2.12863	0.0218285	focadhesin
Fmr1	1104.81	0.244069	0.114677	2.12833	0.0218456	fragile X mental retardation syndrome 1
Gmds	4215.02	-0.321954	0.151328	-2.12751	0.0219079	GDP-mannose 4, 6-dehydratase
H2-DMa	267.503	-0.258762	0.121627	-2.1275	0.0219079	histocompatibility 2, class II, locus DMa
Ptpn18	355.218	-0.263188	0.123775	-2.12635	0.0220118	protein tyrosine phosphatase, non-receptor type 18
Adgrg5	302.738	-0.292705	0.137648	-2.12648	0.0220118	adhesion G protein-coupled receptor G5
Eri3	731.977	-0.201246	0.0947008	-2.12507	0.0221546	exoribonuclease 3
Ncf2	271.543	-0.294739	0.13873	-2.12454	0.0222003	neutrophil cytosolic factor 2
Opa3	1869.92	-0.102973	0.0484731	-2.12434	0.022205	optic atrophy 3
Snrpd2	639.489	-0.236808	0.111517	-2.12352	0.0222891	small nuclear ribonucleoprotein D2
Mcm8	168.42	-0.269609	0.12701	-2.12274	0.0223492	minichromosome maintenance 8 homologous recombination repair factor
Mcoln1	1332.64	0.192272	0.0905782	2.12272	0.0223492	mucolipin 1
Dcps	339.713	-0.247476	0.116617	-2.12213	0.0223608	decapping enzyme, scavenger
Lyz2	1465.56	-0.282522	0.133132	-2.12212	0.0223608	lysozyme 2
Smagp	1503.4	-0.233659	0.110104	-2.12217	0.0223608	small cell adhesion glycoprotein
Ppif	1363.41	-0.218476	0.10301	-2.12092	0.0224961	peptidylprolyl isomerase F (cyclophilin F)
Zfyve9	944.272	0.192894	0.0909922	2.11989	0.0225862	zinc finger, FYVE domain containing 9
Ccnd1	2134.66	-0.286286	0.135042	-2.11998	0.0225862	cyclin D1
Idh2	3315.63	-0.187466	0.0884501	-2.11946	0.0226213	isocitrate dehydrogenase 2 (NADP+), mitochondrial
Mrpl57	619.368	-0.20673	0.0975485	-2.11925	0.0226258	mitochondrial ribosomal protein L57
Fam64a	74.4747	-0.30329	0.143144	-2.11878	0.0226666	family with sequence similarity 64, member A
Ints6	597.863	0.206692	0.0975814	2.11815	0.0227276	integrator complex subunit 6
Fmo2	701.079	0.329018	0.155349	2.11792	0.022735	flavin containing monooxygenase 2
Il6ra	378.409	0.277474	0.131025	2.11772	0.0227389	interleukin 6 receptor, alpha
2810403D21Rik	36.1654	0.309758	0.146381	2.1161	0.0229316	RIKEN cDNA 2810403D21 gene
Itgax	359.032	-0.315692	0.149245	-2.11526	0.0230225	integrin alpha X
Folr1	62.7964	0.322305	0.152397	2.11491	0.0230462	folate receptor 1 (adult)
Mal	254.632	-0.225074	0.106443	-2.11449	0.0230799	myelin and lymphocyte protein, T cell differentiation protein
Hsd3b3	422.209	0.316329	0.149662	2.11363	0.0231733	hydroxy-delta-5-steroid dehydrogenase, 3 beta- and steroid delta-isomerase 3
Dirc2	812.701	0.226739	0.107319	2.11275	0.0232689	disrupted in renal carcinoma 2 (human)
Hspd1-ps4	3.12848	-0.204162	0.0966672	-2.11201	0.0233015	heat shock protein 1 (chaperonin), pseudogene 4
0610037L13Rik	706.612	-0.195284	0.0924632	-2.11202	0.0233015	RIKEN cDNA 0610037L13 gene
Xlr3b	10.9082	-0.329438	0.15596	-2.11232	0.0233015	X-linked lymphocyte-regulated 3B
Gmfg	70.673	-0.309178	0.146424	-2.11152	0.0233226	glia maturation factor, gamma
Nolc1	2122.48	-0.190799	0.0903556	-2.11165	0.0233226	nucleolar and coiled-body phosphoprotein 1
Cfap65	14.1739	0.338599	0.160435	2.11051	0.0234375	NA
Ebp	1690	-0.231781	0.109841	-2.11015	0.0234635	phenylalkylamine Ca2+ antagonist (emopamil) binding protein
Gm8513	6.12014	-0.229232	0.108702	-2.10882	0.0236222	glyceraldehyde-3-phosphate dehydrogenase pseudogene
Ghr	1034.91	0.289638	0.137362	2.10858	0.0236322	growth hormone receptor
Zranb1	1103.91	0.126217	0.0598818	2.10777	0.0237208	zinc finger, RAN-binding domain containing 1
Acvr2a	1108.38	0.252814	0.119964	2.10742	0.0237442	activin receptor IIA
Tns4	2597.12	0.33461	0.158789	2.10727	0.0237442	tensin 4
Mpi	2479.15	-0.237333	0.112663	-2.10657	0.023817	mannose phosphate isomerase
Mt2	835.541	0.33207	0.157681	2.10596	0.0238789	metallothionein 2
Dio1	302.974	-0.329754	0.156604	-2.10565	0.0238979	deiodinase, iodothyronine, type I
Atp6v0e2	1251.77	-0.253247	0.120293	-2.10525	0.0239311	ATPase, H+ transporting, lysosomal V0 subunit E2
Tor1aip1	1013.41	0.238789	0.113472	2.10438	0.0240111	torsin A interacting protein 1
Pomt1	785.147	-0.182364	0.086661	-2.10434	0.0240111	protein-O-mannosyltransferase 1
Arid4a	901.824	0.181055	0.0860798	2.10334	0.0241269	AT rich interactive domain 4A (RBP1-like)
Polr1e	220.721	-0.223841	0.106571	-2.10039	0.0244709	polymerase (RNA) I polypeptide E
Mrpl48	385.201	-0.234192	0.111508	-2.10023	0.0244709	mitochondrial ribosomal protein L48
1110008L16Rik	297.745	-0.214082	0.101926	-2.10036	0.0244709	RIKEN cDNA 1110008L16 gene
Ms4a12	875.642	-0.243556	0.11594	-2.10071	0.0244709	membrane-spanning 4-domains, subfamily A, member 12
Nat2	537.122	0.276645	0.13177	2.09945	0.0245582	N-acetyltransferase 2 (arylamine N-acetyltransferase)
Gm26773	39.232	0.291399	0.138843	2.09877	0.0246323	NA
Zfp629	730.938	0.220343	0.105047	2.09755	0.0247737	zinc finger protein 629
BC030867	159.546	-0.237684	0.113321	-2.09745	0.0247737	cDNA sequence BC030867
Znhit1	734.683	-0.209032	0.0996849	-2.09693	0.0248241	zinc finger, HIT domain containing 1
Pcdh1	4564.84	0.181336	0.0865109	2.09611	0.0249186	protocadherin 1
Zfp846	186.396	-0.205581	0.0980883	-2.09588	0.024928	zinc finger protein 846
Aars	2761.19	-0.122238	0.0583841	-2.09369	0.02522	alanyl-tRNA synthetase
Gm6977	6.08966	-0.263575	0.125903	-2.09348	0.0252266	ferritin heavy chain 1 pseudogene
Usp5	2399.39	-0.124177	0.0593296	-2.093	0.0252494	ubiquitin specific peptidase 5 (isopeptidase T)
C330022C24Rik	1.50606	-0.204553	0.0977272	-2.0931	0.0252494	RIKEN cDNA C330022C24 gene
Katnb1	489.23	-0.174278	0.0832876	-2.09249	0.0252759	katanin p80 (WD40-containing) subunit B 1
Ctdspl	1851.22	0.263299	0.125828	2.09253	0.0252759	CTD (carboxy-terminal domain, RNA polymerase II, polypeptide A) small phosphatase-like
2018-03-07	1323.34	0.239244	0.114381	2.09165	0.025332	membrane-associated ring finger (C3HC4) 7
Ndufa3	1837.2	-0.200194	0.0957126	-2.09162	0.025332	NADH dehydrogenase (ubiquinone) 1 alpha subcomplex, 3
AC125071.1	2.77237	0.252636	0.120766	2.09194	0.025332	NA
Mx2	233.743	0.259162	0.123952	2.09082	0.0254083	MX dynamin-like GTPase 2
Znrd1	442.456	-0.170885	0.0817331	-2.09077	0.0254083	zinc ribbon domain containing, 1
Pkig	1045.82	-0.142647	0.0682399	-2.09037	0.025443	protein kinase inhibitor, gamma
Anxa9	15.9121	-0.33293	0.159304	-2.0899	0.0254883	annexin A9
Erlin1	2672.42	0.164117	0.0785398	2.08961	0.0255071	ER lipid raft associated 1
Grhl3	11.9838	-0.308799	0.147834	-2.08882	0.0255983	grainyhead-like 3 (Drosophila)
Fyttd1	930.79	0.151404	0.0724895	2.08864	0.0256019	forty-two-three domain containing 1
Abcf2	1341.42	-0.1425	0.0682429	-2.08813	0.0256527	ATP-binding cassette, sub-family F (GCN20), member 2
Gm24119	30.2686	0.306284	0.146758	2.087	0.0257959	NA
Orc1	147.068	-0.267311	0.128141	-2.08607	0.0259101	origin recognition complex, subunit 1
Cox6b1	6651.41	-0.197352	0.0946496	-2.08508	0.0260099	cytochrome c oxidase, subunit VIb polypeptide 1
D8Ertd738e	1435.65	-0.162201	0.0777912	-2.08508	0.0260099	DNA segment, Chr 8, ERATO Doi 738, expressed
Lrrc59	10171.9	-0.164472	0.0788999	-2.08456	0.0260621	leucine rich repeat containing 59
Gm1673	14.9949	-0.333004	0.159879	-2.08286	0.0262942	predicted gene 1673
Trim27	1078.46	-0.196324	0.0942839	-2.08227	0.026359	tripartite motif-containing 27
Arhgap12	1720.14	0.199495	0.0958317	2.08172	0.0264175	Rho GTPase activating protein 12
Mrpl9	1349.37	-0.158942	0.0763706	-2.08119	0.0264283	mitochondrial ribosomal protein L9
Lexm	7.81359	-0.299462	0.143872	-2.08145	0.0264283	lymphocyte expansion molecule
Gm45865	3.09656	-0.27296	0.131157	-2.08117	0.0264283	NA
Clybl	288.564	-0.249608	0.119948	-2.08097	0.0264334	citrate lyase beta like
Cyb5r1	634.32	-0.22273	0.107053	-2.08055	0.0264349	cytochrome b5 reductase 1
G3bp1	2864.87	-0.134981	0.0648797	-2.08048	0.0264349	GTPase activating protein (SH3 domain) binding protein 1
Mgl2	100.014	-0.329709	0.158474	-2.08052	0.0264349	macrophage galactose N-acetyl-galactosamine specific lectin 2
Zfp952	198.771	0.197919	0.0951851	2.0793	0.0265893	zinc finger protein 952
Gm26518	8.74376	0.327503	0.157548	2.07875	0.0266491	NA
Llph	125.646	-0.207317	0.0997806	-2.07773	0.0267805	LLP homolog, long-term synaptic facilitation (Aplysia)
Vrk3	1320.83	-0.169668	0.0817113	-2.07644	0.0269544	vaccinia related kinase 3
Lrig3	1275.42	0.209133	0.100753	2.07569	0.0270453	leucine-rich repeats and immunoglobulin-like domains 3
Pde1a	167.753	0.310179	0.149457	2.07537	0.0270462	phosphodiesterase 1A, calmodulin-dependent
Gm26739	3.24777	0.264408	0.1274	2.07542	0.0270462	predicted gene, 26739
Enkd1	100.876	-0.256845	0.12386	-2.07367	0.0272843	enkurin domain containing 1
Ttn	10.2707	0.294125	0.141852	2.07346	0.0272925	titin
Snrpb	2989.98	-0.168502	0.081297	-2.07268	0.02739	small nuclear ribonucleoprotein B
Cpeb2	805.962	0.256875	0.123961	2.07223	0.0274351	cytoplasmic polyadenylation element binding protein 2
Lcp1	795.069	-0.264754	0.127788	-2.07183	0.0274729	lymphocyte cytosolic protein 1
Irf7	2453.42	0.296222	0.143005	2.07141	0.0274896	interferon regulatory factor 7
Gm11996	10.5854	-0.163726	0.0790409	-2.07141	0.0274896	glyceraldehyde-3-phosphate dehydrogenase pseudogene
Gm26809	28.5041	0.314608	0.151951	2.07045	0.0276142	NA
Gsn	7436.27	0.278151	0.134444	2.0689	0.0277635	gelsolin
Cd38	2522.29	-0.33191	0.160405	-2.06919	0.0277635	CD38 antigen
Gpbp1	2104.01	0.166833	0.0806282	2.06917	0.0277635	GC-rich promoter binding protein 1
Ndrg1	5089.6	0.331903	0.160427	2.06887	0.0277635	N-myc downstream regulated gene 1
Snord34	18.3414	-0.330311	0.159721	-2.06805	0.0278689	small nucleolar RNA, C/D box 34
Cep72	192.523	-0.217084	0.10498	-2.06785	0.0278758	centrosomal protein 72
Mboat7	1731.15	-0.12472	0.0603279	-2.06737	0.0279265	membrane bound O-acyltransferase domain containing 7
Bak1	3707.67	-0.225658	0.109214	-2.0662	0.0280888	BCL2-antagonist/killer 1
Snora31	35.6334	-0.304705	0.147492	-2.06591	0.0280973	small nucleolar RNA, H/ACA box 31
Rai14	965.942	0.310515	0.15031	2.06583	0.0280973	retinoic acid induced 14
Rpl7a	1002.08	-0.22409	0.108508	-2.06519	0.028133	ribosomal protein L7A
Mospd3	649.856	-0.205474	0.0995041	-2.06498	0.028133	motile sperm domain containing 3
Ighv5-4	11.5809	-0.248534	0.120331	-2.06542	0.028133	immunoglobulin heavy variable 5-4
Adamts19	107.533	0.307993	0.14915	2.06499	0.028133	a disintegrin-like and metallopeptidase (reprolysin type) with thrombospondin type 1 motif, 19
Uqcc1	768.948	-0.211837	0.102617	-2.06436	0.0281576	ubiquinol-cytochrome c reductase complex assembly factor 1
Flad1	886.287	-0.162896	0.0789051	-2.06446	0.0281576	flavin adenine dinucleotide synthetase 1
Taf6	477.554	-0.155028	0.0750903	-2.06455	0.0281576	TATA-box binding protein associated factor 6
Prr5l	266.749	0.328548	0.159262	2.06294	0.0283353	proline rich 5 like
Gm26669	5.40198	0.307275	0.14894	2.06308	0.0283353	NA
4930415O20Rik	17.4994	-0.330484	0.160222	-2.06267	0.0283529	RIKEN cDNA 4930415O20 gene
Gstt2	659.524	-0.17661	0.0856751	-2.06139	0.02851	glutathione S-transferase, theta 2
Eral1	463.386	-0.173307	0.0840693	-2.06148	0.02851	Era (G-protein)-like 1 (E. coli)
Apoa1bp	784.718	-0.157287	0.0763313	-2.06058	0.0285541	apolipoprotein A-I binding protein
Stk11	2158.01	-0.127873	0.0620632	-2.06036	0.0285541	serine/threonine kinase 11
Rasa1	1085.03	0.174935	0.0848969	2.06056	0.0285541	RAS p21 protein activator 1
Gm17799	8.84758	-0.251165	0.121905	-2.06034	0.0285541	glyceraldehyde-3-phosphate dehydrogenase pseudogene
Pcdhga5	9.53623	0.328289	0.159298	2.06084	0.0285541	protocadherin gamma subfamily A, 5
Ifi211	22.1969	0.325819	0.158151	2.06018	0.0285545	interferon activated gene 211
Tob2	1470.34	0.172089	0.0835672	2.05929	0.0286744	transducer of ERBB2, 2
Gpihbp1	100.685	0.304473	0.147877	2.05896	0.0287024	GPI-anchored HDL-binding protein 1
Psmc4	2637.21	-0.164537	0.0799191	-2.05879	0.0287048	proteasome (prosome, macropain) 26S subunit, ATPase, 4
Gm17235	3.25517	-0.188218	0.0914399	-2.05837	0.0287475	annexin A2 pseudogene
Gm45802	47.282	-0.304454	0.148062	-2.05626	0.0290678	NA
Gm42783	15.9513	0.329631	0.160333	2.05592	0.0290731	NA
Incenp	1320.67	-0.215418	0.104772	-2.05605	0.0290731	inner centromere protein
Abcc4	322.337	0.16924	0.0823436	2.05529	0.0291009	ATP-binding cassette, sub-family C (CFTR/MRP), member 4
Ophn1	249.951	0.234066	0.113873	2.0555	0.0291009	oligophrenin 1
Prdx4	754.558	-0.189536	0.0922149	-2.05537	0.0291009	peroxiredoxin 4
Ebf2	16.0481	0.310291	0.151034	2.05444	0.0291899	early B cell factor 2
Amacr	471.461	-0.207834	0.10116	-2.0545	0.0291899	alpha-methylacyl-CoA racemase
Insr	1848.98	0.26828	0.130625	2.05382	0.0292675	insulin receptor
Iqgap3	929.355	-0.230893	0.112454	-2.05322	0.0293419	IQ motif containing GTPase activating protein 3
Otud3	329.89	0.233906	0.113966	2.05242	0.0294498	OTU domain containing 3
Dennd6a	967.146	0.170051	0.0828716	2.05198	0.0294965	DENN/MADD domain containing 6A
Psmb2	2451.64	-0.17809	0.0868024	-2.05167	0.0295073	proteasome (prosome, macropain) subunit, beta type 2
Ppp2r2d	801.094	0.116078	0.0565791	2.05161	0.0295073	protein phosphatase 2, regulatory subunit B, delta
Fbxo24	33.9509	-0.290525	0.141623	-2.0514	0.0295172	F-box protein 24
Slc2a4rg-ps	434.756	-0.16726	0.0816344	-2.04889	0.0299123	Slc2a4 regulator, pseudogene
Ppil1	997.712	-0.187093	0.091395	-2.04708	0.0301935	peptidylprolyl isomerase (cyclophilin)-like 1
Mettl24	31.5789	-0.322581	0.157596	-2.04689	0.0302005	methyltransferase like 24
Rpe	1149.06	-0.148688	0.0726838	-2.04569	0.0303794	ribulose-5-phosphate-3-epimerase
Tuba1c	1248.03	-0.213154	0.10424	-2.04485	0.0304969	tubulin, alpha 1C
Gm43499	2.64136	0.239996	0.117412	2.04405	0.0306089	NA
Exosc8	532.955	-0.211548	0.103514	-2.04366	0.0306481	exosome component 8
Clec2e	4391.69	0.316864	0.155059	2.04351	0.0306481	C-type lectin domain family 2, member e
Zfp263	662.094	0.169151	0.0827917	2.04309	0.030695	zinc finger protein 263
Prom1	1307.7	-0.307586	0.150582	-2.04265	0.0307225	prominin 1
Ppp4r3a	2107.04	0.171691	0.0840542	2.04263	0.0307225	NA
Gm7694	1146.98	0.294491	0.144207	2.04214	0.0307536	predicted gene 7694
Foxn2	435.57	0.244121	0.119538	2.04219	0.0307536	forkhead box N2
AC150314.3	6.07976	-0.280147	0.1372	-2.04189	0.0307708	NA
Fbxo39	1.57143	0.148851	0.0729361	2.04084	0.0309268	F-box protein 39
Bpgm	1536.24	-0.199099	0.0976011	-2.03993	0.0310593	2,3-bisphosphoglycerate mutase
Bub3	1634.26	-0.137191	0.0673198	-2.0379	0.0313622	BUB3 mitotic checkpoint protein
Ssbp4	968.683	-0.264733	0.129901	-2.03797	0.0313622	single stranded DNA binding protein 4
Hspd1	3432.22	-0.203636	0.099963	-2.03711	0.0313943	heat shock protein 1 (chaperonin)
Spo11	2.66487	-0.230049	0.112916	-2.03735	0.0313943	SPO11 meiotic protein covalently bound to DSB
Lamtor1	996.755	-0.182816	0.0897416	-2.03714	0.0313943	late endosomal/lysosomal adaptor, MAPK and MTOR activator 1
Aars2	466.862	-0.248874	0.12216	-2.03729	0.0313943	alanyl-tRNA synthetase 2, mitochondrial
Dnaic1	35.4844	-0.307171	0.150822	-2.03664	0.0313974	dynein, axonemal, intermediate chain 1
Gm17910	4.97075	-0.200244	0.098313	-2.0368	0.0313974	nucleophosmin 1 pseudogene
Gm8709	5.28576	-0.209728	0.10297	-2.03679	0.0313974	glyceraldehyde-3-phosphate dehydrogenase pseudogene
Gbp6	25.8086	0.2959	0.145374	2.03544	0.0315031	guanylate binding protein 6
Gm13854	3.48689	-0.145147	0.0713	-2.03573	0.0315031	heat shock protein 8 pseudogene
Clpb	688.591	-0.207855	0.102114	-2.03552	0.0315031	ClpB caseinolytic peptidase B
Cmpk2	2008.57	0.283291	0.139164	2.03566	0.0315031	cytidine monophosphate (UMP-CMP) kinase 2, mitochondrial
Siah2	397.985	-0.165695	0.081502	-2.03301	0.0319084	seven in absentia 2
Pgs1	1241.41	-0.27262	0.134221	-2.03113	0.0321925	phosphatidylglycerophosphate synthase 1
Trim8	1187	0.170972	0.0841736	2.03119	0.0321925	tripartite motif-containing 8
Psmd2	4042.56	-0.142208	0.070023	-2.03087	0.0322133	proteasome (prosome, macropain) 26S subunit, non-ATPase, 2
Nop56	1339.34	-0.181206	0.0892462	-2.0304	0.0322164	NOP56 ribonucleoprotein
Trnau1ap	467.338	-0.180704	0.088994	-2.03052	0.0322164	tRNA selenocysteine 1 associated protein 1
Nup93	1056.7	-0.218758	0.107741	-2.03041	0.0322164	nucleoporin 93
Letm1	4322.13	-0.131284	0.0646701	-2.03006	0.032223	leucine zipper-EF-hand containing transmembrane protein 1
Gm2a	867.307	-0.218139	0.107454	-2.03008	0.032223	GM2 ganglioside activator protein
Stxbp3	1411.81	0.169754	0.0836637	2.029	0.0323617	syntaxin binding protein 3
Txlng	387.463	0.237393	0.116998	2.02904	0.0323617	taxilin gamma
Gm12482	5.3627	-0.226721	0.111749	-2.02885	0.0323626	nascent polypeptide-associated complex alpha polypeptide pseudogene
Psma1	2411.99	-0.173389	0.0854685	-2.02868	0.0323647	proteasome (prosome, macropain) subunit, alpha type 1
Foxj2	698.645	0.172918	0.0852597	2.02813	0.0324379	forkhead box J2
Psma6	2870.55	-0.138957	0.0685321	-2.02762	0.0325034	proteasome (prosome, macropain) subunit, alpha type 6
Txn1	12136.3	-0.186281	0.0919148	-2.02668	0.0326314	thioredoxin 1
Elovl7	1884.79	-0.208006	0.102644	-2.02647	0.0326314	ELOVL family member 7, elongation of long chain fatty acids (yeast)
Was	94.3475	-0.292251	0.144211	-2.02654	0.0326314	Wiskott-Aldrich syndrome
Gart	1229.21	-0.152713	0.075393	-2.02556	0.0327713	phosphoribosylglycinamide formyltransferase
Ssr1	4517.57	-0.182022	0.0898795	-2.02518	0.0328143	signal sequence receptor, alpha
Agtrap	417.285	-0.234057	0.115598	-2.02474	0.0328619	angiotensin II, type I receptor-associated protein
Igkv12-44	16.6297	-0.313734	0.154971	-2.02447	0.0328619	immunoglobulin kappa variable 12-44
Aaas	572.658	-0.232512	0.11485	-2.02448	0.0328619	achalasia, adrenocortical insufficiency, alacrimia
Gm14537	0.86414	-0.150481	0.0743448	-2.02409	0.0329049	high mobility group box 2 pseudogene
Rps18-ps1	1.61549	-0.186863	0.0923352	-2.02375	0.0329132	ribosomal protein S18, pseudogene 1
Gm26917	3272.45	-0.315823	0.156049	-2.02387	0.0329132	NA
Vcp	326.03	-0.197766	0.09774	-2.02339	0.0329524	valosin containing protein
Gml	34.3214	-0.239402	0.118366	-2.02255	0.0330795	glycosylphosphatidylinositol anchored molecule like
Nfil3	311.958	-0.32408	0.160289	-2.02185	0.0331819	nuclear factor, interleukin 3, regulated
Acer3	495.28	-0.251816	0.124594	-2.0211	0.0332945	alkaline ceramidase 3
Wdr4	773.186	-0.154773	0.0765904	-2.02079	0.0333243	WD repeat domain 4
Gm31363	45.9992	0.322186	0.159454	2.02056	0.0333401	predicted gene, 31363
Gm29228	1.59147	-0.167648	0.0830183	-2.01941	0.0335269	predicted gene 29228
Ccna2	1853.63	-0.215175	0.106567	-2.01915	0.0335474	cyclin A2
Mef2a	1099.98	0.179916	0.0891113	2.019	0.0335474	myocyte enhancer factor 2A
Retnlb	409.962	-0.143001	0.0708414	-2.01861	0.0335938	resistin like beta
Ang	247.325	-0.298287	0.147787	-2.01836	0.0336137	angiogenin, ribonuclease, RNase A family, 5
Cxcl16	773.217	0.262943	0.130303	2.01793	0.0336408	chemokine (C-X-C motif) ligand 16
Dnah8	196.014	-0.30697	0.152128	-2.01785	0.0336408	dynein, axonemal, heavy chain 8
Ndufa7	1344.19	-0.17555	0.0870018	-2.01777	0.0336408	NADH dehydrogenase (ubiquinone) 1 alpha subcomplex, 7 (B14.5a)
Foxj3	1412.98	0.258	0.127908	2.01708	0.0337432	forkhead box J3
Pip5k1a	858.561	0.115753	0.0574152	2.01606	0.033907	phosphatidylinositol-4-phosphate 5-kinase, type 1 alpha
Padi4	3.94512	-0.269095	0.133533	-2.01519	0.0340454	peptidyl arginine deiminase, type IV
Elac2	763.746	-0.176281	0.0874947	-2.01477	0.0340914	elaC ribonuclease Z 2
Anapc11	580.877	-0.197846	0.0982034	-2.01465	0.0340914	anaphase promoting complex subunit 11
Gm9493	7.64591	-0.305658	0.151751	-2.01421	0.034148	predicted gene 9493
Uchl3	398.032	-0.197501	0.0980952	-2.01336	0.0342534	ubiquitin carboxyl-terminal esterase L3 (ubiquitin thiolesterase)
Zfand5	1138.47	-0.141536	0.070295	-2.01345	0.0342534	zinc finger, AN1-type domain 5
Ndufa11	1772.45	-0.184128	0.0914758	-2.01287	0.03432	NADH dehydrogenase (ubiquinone) 1 alpha subcomplex 11
Pfdn2	565.506	-0.163635	0.0813279	-2.01204	0.0343959	prefoldin 2
Igkv2-116	12.8596	-0.269802	0.134097	-2.01199	0.0343959	immunoglobulin kappa variable 2-116
Gm9625	196.044	-0.234414	0.116496	-2.01222	0.0343959	ribosomal protein, large, P0 pseudogene
Zswim8	2460.45	0.139646	0.0694105	2.01189	0.0343959	zinc finger SWIM-type containing 8
Colgalt2	91.9155	0.26798	0.133223	2.01151	0.0344399	collagen beta(1-O)galactosyltransferase 2
4930534D22Rik	24.2887	0.322645	0.160426	2.01118	0.0344755	RIKEN cDNA 4930534D22 gene
Thop1	975.615	-0.163612	0.0813746	-2.0106	0.0345311	thimet oligopeptidase 1
Tsga10ip	8.58991	-0.310213	0.15428	-2.01072	0.0345311	testis specific 10 interacting protein
Scarb2	2067.94	0.15674	0.0779879	2.0098	0.0346232	scavenger receptor class B, member 2
Washc5	1377.36	0.132726	0.0660434	2.00969	0.0346232	NA
Prr13	4579.42	-0.285165	0.14189	-2.00975	0.0346232	proline rich 13
Pak6	63.5241	-0.308799	0.153699	-2.00912	0.0347016	p21 protein (Cdc42/Rac)-activated kinase 6
Cachd1	1143.62	0.262254	0.130544	2.00893	0.0347016	cache domain containing 1
Stt3a	5710.53	-0.153673	0.0765039	-2.0087	0.0347016	STT3, subunit of the oligosaccharyltransferase complex, homolog A (S. cerevisiae)
Grhl1	53.5832	-0.256547	0.127713	-2.00878	0.0347016	grainyhead-like 1 (Drosophila)
Ccdc190	60.4609	-0.287233	0.143057	-2.00783	0.0348419	coiled-coil domain containing 190
Trim30b	8.02154	0.2595	0.12928	2.00727	0.0349222	tripartite motif-containing 30B
Armc2	59.9919	-0.287022	0.143004	-2.00709	0.0349295	armadillo repeat containing 2
Bcat2	790.445	-0.199325	0.0993254	-2.00678	0.0349607	branched chain aminotransferase 2, mitochondrial
Ifi204	87.4968	0.281916	0.140624	2.00475	0.0353283	interferon activated gene 204
Grpel2	934.677	0.181614	0.0906015	2.00454	0.0353414	GrpE-like 2, mitochondrial
Adgra3	1603.14	-0.290722	0.145097	-2.00364	0.0354635	adhesion G protein-coupled receptor A3
Tmem173	339.811	-0.319741	0.15958	-2.00363	0.0354635	transmembrane protein 173
Gm15564	2.19012	0.219897	0.109761	2.00343	0.0354753	predicted gene 15564
Ddx39	2301.03	-0.184614	0.0921722	-2.00292	0.0355462	DEAD (Asp-Glu-Ala-Asp) box polypeptide 39
Btg1	2260.49	0.213238	0.10652	2.00185	0.0357296	B cell translocation gene 1, anti-proliferative
Ms4a6c	106.449	-0.227631	0.113801	-2.00026	0.036018	membrane-spanning 4-domains, subfamily A, member 6C
Gm43681	55.0537	0.314023	0.157021	1.99988	0.0360481	NA
Aimp2	388.01	-0.187704	0.0938608	-1.99982	0.0360481	aminoacyl tRNA synthetase complex-interacting multifunctional protein 2
0610009O20Rik	1070.77	-0.140695	0.0703671	-1.99944	0.0360946	RIKEN cDNA 0610009O20 gene
Psmd7	2211.17	-0.172228	0.0861638	-1.99884	0.0361857	proteasome (prosome, macropain) 26S subunit, non-ATPase, 7
2810025M15Rik	189.455	-0.245634	0.122928	-1.99819	0.0362584	RIKEN cDNA 2810025M15 gene
Glrx5	1164.54	-0.242086	0.121148	-1.99827	0.0362584	glutaredoxin 5
Psma5	480.335	-0.201064	0.100654	-1.99757	0.036298	proteasome (prosome, macropain) subunit, alpha type 5
Lpar1	1696.05	0.184607	0.0924101	1.99769	0.036298	lysophosphatidic acid receptor 1
Pik3c2g	88.5477	0.282048	0.141194	1.99759	0.036298	phosphatidylinositol 3-kinase, C2 domain containing, gamma polypeptide
Ddx58	1443.35	0.31999	0.160216	1.99724	0.0363067	DEAD (Asp-Glu-Ala-Asp) box polypeptide 58
Ifngr2	4366.94	0.161982	0.0810999	1.99731	0.0363067	interferon gamma receptor 2
Rrbp1	13978.3	-0.198491	0.0994295	-1.9963	0.036449	ribosome binding protein 1
Prdx2	2488.06	-0.194471	0.0974183	-1.99625	0.036449	peroxiredoxin 2
Nudt14	460.805	-0.163038	0.0816806	-1.99604	0.0364618	nudix (nucleoside diphosphate linked moiety X)-type motif 14
1600012H06Rik	857.081	0.142868	0.0715859	1.99575	0.0364915	RIKEN cDNA 1600012H06 gene
Malrd1	4369.06	0.298892	0.149842	1.99472	0.0366038	MAM and LDL receptor class A domain containing 1
Akr1b7	573.094	-0.312886	0.156898	-1.9942	0.0366038	aldo-keto reductase family 1, member B7
5730522E02Rik	2.16827	0.232315	0.116493	1.99424	0.0366038	RIKEN cDNA 5730522E02 gene
Dlgap5	507.798	-0.22669	0.113666	-1.99435	0.0366038	discs, large (Drosophila) homolog-associated protein 5
Bnip1	478.866	-0.210992	0.105773	-1.99475	0.0366038	BCL2/adenovirus E1B interacting protein 1
Tmem255a	14.9482	0.303836	0.15232	1.99472	0.0366038	transmembrane protein 255A
Gm8199	5.73131	-0.201923	0.101239	-1.99453	0.0366038	ribosomal protein, large, P0 pseudogene
Tmem33	1783.46	-0.177652	0.0891076	-1.99368	0.0366804	transmembrane protein 33
Park7	1954.51	-0.194245	0.0974542	-1.9932	0.0367504	Parkinson disease (autosomal recessive, early onset) 7
Ppp4c	2293.55	-0.124774	0.0626055	-1.99302	0.0367567	protein phosphatase 4, catalytic subunit
Gm43180	1.28248	0.184415	0.0925391	1.99283	0.0367594	NA
Gm43965	20.1878	-0.3198	0.160492	-1.99262	0.0367594	NA
Nup62	1293.41	-0.162968	0.081787	-1.99259	0.0367594	nucleoporin 62
Asns	845.6	-0.288591	0.144889	-1.99181	0.0368602	asparagine synthetase
Ctu1	259.464	-0.194894	0.0978456	-1.99185	0.0368602	cytosolic thiouridylase subunit 1
Ankle1	417.238	-0.245803	0.12344	-1.99127	0.036904	ankyrin repeat and LEM domain containing 1
Pgam2	80.8466	-0.219311	0.110128	-1.99142	0.036904	phosphoglycerate mutase 2
Add3	4897.92	0.225089	0.113044	1.99117	0.036904	adducin 3 (gamma)
Rnf43	893.387	0.160743	0.0807347	1.991	0.0369103	ring finger protein 43
Cdc20	1539.47	-0.262386	0.131869	-1.98975	0.0371156	cell division cycle 20
Rabep1	1337.12	0.191126	0.0960568	1.98971	0.0371156	rabaptin, RAB GTPase binding effector protein 1
Rpl10-ps3	66.0039	-0.309896	0.155761	-1.98957	0.0371173	ribosomal protein L10, pseudogene 3
Lect2	24.5442	0.285969	0.143745	1.98942	0.0371178	leukocyte cell-derived chemotaxin 2
A330040F15Rik	55.1045	0.258541	0.129975	1.98916	0.0371428	RIKEN cDNA A330040F15 gene
Eif2b4	829.71	-0.136037	0.068411	-1.98853	0.0372442	eukaryotic translation initiation factor 2B, subunit 4 delta
Lrch3	1180.63	0.198335	0.0997562	1.98819	0.037284	leucine-rich repeats and calponin homology (CH) domain containing 3
Akr1c19	3556.96	0.316281	0.15917	1.98706	0.0374878	aldo-keto reductase family 1, member C19
Olfr78	90.4362	0.265285	0.133537	1.9866	0.0375534	olfactory receptor 78
Tubb5	8570.96	-0.235532	0.118585	-1.98619	0.0376093	tubulin, beta 5 class I
Enpp2	488.906	0.251267	0.126562	1.98533	0.0377588	ectonucleotide pyrophosphatase/phosphodiesterase 2
Ppp1r14d	2721.62	-0.222565	0.112124	-1.98498	0.0378022	protein phosphatase 1, regulatory (inhibitor) subunit 14D
Aup1	2820.37	-0.138808	0.0699552	-1.98425	0.0378685	ancient ubiquitous protein 1
Batf	26.4589	-0.312537	0.157503	-1.98432	0.0378685	basic leucine zipper transcription factor, ATF-like
Habp2	679.457	-0.220682	0.111208	-1.98442	0.0378685	hyaluronic acid binding protein 2
Lcmt2	214.607	-0.189945	0.0957387	-1.98399	0.0378687	leucine carboxyl methyltransferase 2
Nap1l2	8.35677	0.264021	0.133077	1.98397	0.0378687	nucleosome assembly protein 1-like 2
Olfr165	336.3	0.316748	0.159678	1.98367	0.0379027	olfactory receptor 165
Art2b	31.2881	-0.309639	0.156239	-1.98182	0.0382593	ADP-ribosyltransferase 2b
Chst13	3.6378	-0.204097	0.103007	-1.98139	0.0383215	carbohydrate (chondroitin 4) sulfotransferase 13
Rara	1129.51	0.157148	0.0793277	1.981	0.0383734	retinoic acid receptor, alpha
Dusp12	349.324	0.249806	0.126133	1.98049	0.0384222	dual specificity phosphatase 12
Bola2	439.389	-0.222769	0.112479	-1.98054	0.0384222	bolA-like 2 (E. coli)
Pold1	844.075	-0.216281	0.109258	-1.97955	0.0385631	polymerase (DNA directed), delta 1, catalytic subunit
Hn1l	1457.61	-0.15335	0.0774654	-1.9796	0.0385631	hematological and neurological expressed 1-like
Sigmar1	1328.88	-0.215029	0.108646	-1.97917	0.0386136	sigma non-opioid intracellular receptor 1
H2afx	1170.82	-0.244468	0.12354	-1.97886	0.0386472	H2A histone family, member X
Lrrtm3	26.6832	0.311375	0.157382	1.97846	0.0386472	leucine rich repeat transmembrane neuronal 3
Ptrh2	479.024	-0.186319	0.094164	-1.97866	0.0386472	peptidyl-tRNA hydrolase 2
Ighg3	2.6354	-0.176241	0.0890761	-1.97855	0.0386472	Immunoglobulin heavy constant gamma 3
Cenpe	633.195	-0.225476	0.113983	-1.97815	0.0386832	centromere protein E
Aif1l	48.7233	-0.30953	0.156486	-1.978	0.0386878	allograft inflammatory factor 1-like
Rgs19	146.996	-0.231546	0.117086	-1.97757	0.0387489	regulator of G-protein signaling 19
Gsdmcl2	80.2714	-0.300562	0.152009	-1.97726	0.038785	gasdermin C-like 2
Slc35a2	1364.27	-0.234915	0.118817	-1.97712	0.0387856	solute carrier family 35 (UDP-galactose transporter), member A2
Gm8731	5.33745	-0.205712	0.104081	-1.97646	0.038897	predicted gene 8731
Glrx3	554.514	-0.152107	0.0769648	-1.97632	0.0388974	glutaredoxin 3
Tmem147	1441.94	-0.225246	0.113989	-1.97603	0.0389022	transmembrane protein 147
Nedd9	1834.29	0.21409	0.108342	1.97605	0.0389022	neural precursor cell expressed, developmentally down-regulated gene 9
AC153524.3	9.47515	-0.269556	0.136439	-1.97565	0.0389531	NA
Poc1b	642.048	-0.183742	0.0930354	-1.97497	0.0390698	POC1 centriolar protein B
Dpp3	2689.11	-0.159498	0.0807712	-1.97469	0.0390997	dipeptidylpeptidase 3
Pigu	787.905	-0.155414	0.0787132	-1.97444	0.0391247	phosphatidylinositol glycan anchor biosynthesis, class U
Fam168b	3944.76	0.11904	0.0603083	1.97385	0.0391562	family with sequence similarity 168, member B
Arnt	1592.25	0.119038	0.0602997	1.9741	0.0391562	aryl hydrocarbon receptor nuclear translocator
Zfp664	1936.53	0.160753	0.0814458	1.97374	0.0391562	zinc finger protein 664
Rps26-ps1	6.36534	-0.227965	0.115491	-1.97387	0.0391562	ribosomal protein S26, pseudogene 1
6330418K02Rik	19.7306	-0.315865	0.16005	-1.97354	0.0391697	RIKEN cDNA 6330418K02 gene
AC164702.2	2.40294	0.238378	0.120851	1.9725	0.0393648	NA
Dynlrb1	1643.99	-0.179927	0.0912507	-1.97179	0.039488	dynein light chain roadblock-type 1
Gm17826	1.65705	0.187185	0.0949718	1.97096	0.0396381	ribosomal protein L7A pseudogene
Rph3al	574.586	-0.206671	0.104869	-1.97075	0.039654	rabphilin 3A-like (without C2 domains)
Ghdc	346.399	-0.199215	0.101098	-1.9705	0.0396778	GH3 domain containing
Cstf1	845.343	-0.106129	0.0538852	-1.96955	0.0396872	cleavage stimulation factor, 3' pre-RNA, subunit 1
Reln	429.352	0.279882	0.142057	1.97021	0.0396872	reelin
Rfc1	1185.9	-0.103876	0.0527263	-1.9701	0.0396872	replication factor C (activator 1) 1
Sec61a1	5254.29	-0.187689	0.095296	-1.96954	0.0396872	Sec61 alpha 1 subunit (S. cerevisiae)
Uqcr11	2056.52	-0.221262	0.112328	-1.96979	0.0396872	ubiquinol-cytochrome c reductase, complex III subunit XI
Clptm1l	3526.4	-0.148108	0.0752004	-1.96951	0.0396872	CLPTM1-like
Dsg1c	1.36878	0.198263	0.100644	1.96994	0.0396872	desmoglein 1 gamma
H2-T10	210.036	0.312831	0.158851	1.96934	0.0396957	histocompatibility 2, T region locus 10
1700066B19Rik	339.522	-0.292089	0.148338	-1.96908	0.0397229	RIKEN cDNA 1700066B19 gene
Cd3d	10.7568	-0.280299	0.142494	-1.96709	0.0401258	CD3 antigen, delta polypeptide
Gins4	468.05	-0.170921	0.0869045	-1.96677	0.0401657	GINS complex subunit 4 (Sld5 homolog)
Gm16863	18.1491	-0.314685	0.160047	-1.9662	0.0402611	predicted gene, 16863
Trap1	2494.81	-0.151426	0.077034	-1.9657	0.0403411	TNF receptor-associated protein 1
Cdkn2aipnl	915.553	-0.172681	0.0878624	-1.96535	0.040389	CDKN2A interacting protein N-terminal like
Phf23	1196.21	0.196897	0.100196	1.96511	0.0404123	PHD finger protein 23
Rpl26	1498.16	-0.167917	0.0854878	-1.96423	0.0405781	ribosomal protein L26
Gm5620	22.1092	-0.308354	0.157011	-1.9639	0.0405908	tubulin, alpha 1B pseudogene
Olfr56	51.5704	0.253823	0.129244	1.9639	0.0405908	olfactory receptor 56
Shkbp1	702.006	-0.138488	0.0705422	-1.9632	0.0407161	Sh3kbp1 binding protein 1
D10Jhu81e	924.557	-0.18902	0.0963051	-1.96272	0.0407932	DNA segment, Chr 10, Johns Hopkins University 81 expressed
Pole2	141.669	-0.217615	0.110927	-1.96179	0.0409702	polymerase (DNA directed), epsilon 2 (p59 subunit)
Cd48	67.0853	-0.288089	0.146866	-1.96157	0.0409874	CD48 antigen
Gm17197	22.6555	-0.299872	0.152895	-1.9613	0.0410197	predicted gene 17197
Gimap7	9.97616	-0.274605	0.140114	-1.95987	0.0413097	GTPase, IMAP family member 7
Pif1	254.728	-0.238811	0.121873	-1.9595	0.0413491	PIF1 5'-to-3' DNA helicase
Ndufa12	579.578	-0.236215	0.120553	-1.95942	0.0413491	NADH dehydrogenase (ubiquinone) 1 alpha subcomplex, 12
Mrpl24	1268.43	-0.116141	0.059304	-1.95839	0.0415506	mitochondrial ribosomal protein L24
Nup85	1151.14	-0.18852	0.0962776	-1.95809	0.0415883	nucleoporin 85
Tldc1	358.593	-0.13956	0.0713169	-1.9569	0.0418287	TBC/LysM associated domain containing 1
Myo3a	5.67933	0.264338	0.135136	1.95609	0.0419671	myosin IIIA
Gm12017	11.0624	-0.232118	0.118668	-1.95602	0.0419671	glyceraldehyde-3-phosphate dehydrogenase pseudogene
2018-09-01	135.233	-0.286472	0.146493	-1.95554	0.0420061	septin 1
Chst4	1108.87	-0.302875	0.154896	-1.95534	0.0420061	carbohydrate (chondroitin 6/keratan) sulfotransferase 4
0610010F05Rik	350.9	0.16586	0.0848133	1.95559	0.0420061	RIKEN cDNA 0610010F05 gene
Eef1d	2161.19	-0.205281	0.104986	-1.95532	0.0420061	eukaryotic translation elongation factor 1 delta (guanine nucleotide exchange protein)
Lmbrd1	1859.23	0.204012	0.104362	1.95485	0.0420818	LMBR1 domain containing 1
Gatad2b	1210.19	0.158278	0.0809861	1.95439	0.0421199	GATA zinc finger domain containing 2B
Gm45605	55.7783	0.280516	0.143539	1.95428	0.0421199	NA
Rnf19a	1305.61	0.206668	0.105746	1.95437	0.0421199	ring finger protein 19A
Psph	217.451	-0.215304	0.110238	-1.95309	0.0423638	phosphoserine phosphatase
Rce1	566.301	-0.193715	0.0992328	-1.95213	0.0425537	Ras converting CAAX endopeptidase 1
Erfe	275.67	-0.244579	0.125356	-1.95108	0.0427629	NA
Coq5	1033.33	-0.214799	0.110099	-1.95096	0.0427629	coenzyme Q5 methyltransferase
Znfx1	2027.38	0.312765	0.16035	1.95052	0.0427837	zinc finger, NFX1-type containing 1
Lrp8	216.044	-0.303428	0.155567	-1.95047	0.0427837	low density lipoprotein receptor-related protein 8, apolipoprotein e receptor
Atad2	773.691	-0.230173	0.117999	-1.95064	0.0427837	ATPase family, AAA domain containing 2
Psd2	17.2938	0.310758	0.159376	1.94984	0.042899	pleckstrin and Sec7 domain containing 2
Defb40	3.87235	0.212108	0.10881	1.94935	0.0429823	defensin beta 40
Gm15541	9.53824	-0.296837	0.152302	-1.949	0.0430043	predicted gene 15541
Pfdn6	820.24	-0.22285	0.114342	-1.94899	0.0430043	prefoldin subunit 6
Wbp1	1438.86	-0.128014	0.0657024	-1.9484	0.0431111	WW domain binding protein 1
Mbtd1	676.556	0.184078	0.0945347	1.9472	0.043361	mbt domain containing 1
Fancf	76.5028	-0.234318	0.120354	-1.9469	0.0433745	Fanconi anemia, complementation group F
Wdr90	357.458	-0.207458	0.10656	-1.94687	0.0433745	WD repeat domain 90
Zfp995	164.639	0.244474	0.125604	1.94639	0.0434295	zinc finger protein 995
Tjap1	1117.75	0.195972	0.100685	1.94638	0.0434295	tight junction associated protein 1
Usp48	1587.14	-0.0993404	0.0510662	-1.94533	0.0435984	ubiquitin specific peptidase 48
Pdk4	589.784	0.297217	0.152773	1.94549	0.0435984	pyruvate dehydrogenase kinase, isoenzyme 4
Exosc7	762.673	-0.214689	0.110365	-1.94526	0.0435984	exosome component 7
Polr3f	481.538	0.153357	0.0788458	1.94503	0.0436222	polymerase (RNA) III (DNA directed) polypeptide F
Plekhg6	2660.64	0.242658	0.124807	1.94426	0.0437407	pleckstrin homology domain containing, family G (with RhoGef domain) member 6
Klra2	9.30016	-0.299481	0.154028	-1.94433	0.0437407	killer cell lectin-like receptor, subfamily A, member 2
Lzts3	2755.74	-0.20039	0.103083	-1.94396	0.0437804	leucine zipper, putative tumor suppressor family member 3
Gm7434	4.92007	-0.225925	0.116276	-1.94301	0.0439749	predicted gene 7434
Spats1	2.69657	-0.210065	0.108186	-1.94171	0.0442534	spermatogenesis associated, serine-rich 1
Gale	3442.81	-0.279177	0.143892	-1.94018	0.0445874	galactose-4-epimerase, UDP
Ptprq	1.59563	0.176982	0.0912288	1.93998	0.0446049	protein tyrosine phosphatase, receptor type, Q
Agr3	169.496	0.307417	0.158484	1.93974	0.0446313	anterior gradient 3
Mcl1	9688.36	0.201735	0.104025	1.93928	0.0446772	myeloid cell leukemia sequence 1
Ccny	1919.59	0.143616	0.0740528	1.93937	0.0446772	cyclin Y
Fbxw5	1208.05	-0.144234	0.0744509	-1.9373	0.045125	F-box and WD-40 domain protein 5
Bcl2l15	583.842	-0.255309	0.131825	-1.93672	0.0452014	BCLl2-like 15
Timmdc1	641.944	-0.138364	0.0714401	-1.93678	0.0452014	translocase of inner mitochondrial membrane domain containing 1
Pwp1	704.034	-0.134141	0.0692761	-1.93633	0.0452665	PWP1 homolog, endonuclein
Kansl1l	212.724	0.230085	0.118855	1.93585	0.0453514	KAT8 regulatory NSL complex subunit 1-like
Gab2	827.081	0.241512	0.12477	1.93565	0.045358	growth factor receptor bound protein 2-associated protein 2
Samd12	3.11245	-0.25224	0.130323	-1.9355	0.045358	sterile alpha motif domain containing 12
Tomm6	6.82194	-0.288181	0.148898	-1.93543	0.045358	translocase of outer mitochondrial membrane 6 homolog (yeast)
Gm12940	325.603	0.141519	0.0731413	1.93487	0.0454637	NA
Eif4a-ps4	47.8723	-0.283004	0.146282	-1.93465	0.045485	eukaryotic translation initiation factor 4A, pseudogene 4
Thyn1	859.639	-0.174299	0.0901223	-1.93402	0.0456057	thymocyte nuclear protein 1
Hnf4g	6036.01	0.297829	0.154026	1.93363	0.0456058	hepatocyte nuclear factor 4, gamma
Plekhg3	1267.79	0.14888	0.0769898	1.93376	0.0456058	pleckstrin homology domain containing, family G (with RhoGef domain) member 3
Fth1	19753.1	-0.236539	0.122324	-1.93372	0.0456058	ferritin heavy polypeptide 1
Top2a	4877.16	-0.203326	0.105169	-1.93332	0.0456506	topoisomerase (DNA) II alpha
Gm21981	1.10228	0.153139	0.0792207	1.93307	0.0456813	NA
Acss3	32.27	0.307944	0.159324	1.93282	0.0457106	acyl-CoA synthetase short-chain family member 3
Trp53i11	1985.54	-0.308039	0.159397	-1.93252	0.0457266	transformation related protein 53 inducible protein 11
AC167360.1	0.924542	0.142425	0.0737	1.93249	0.0457266	NA
Tdrd3	502.17	0.119632	0.0619101	1.93235	0.0457301	tudor domain containing 3
Ran	1724.84	-0.213605	0.110565	-1.93195	0.0457958	RAN, member RAS oncogene family
Psmb4	3716.12	-0.157164	0.0813819	-1.93119	0.0459526	proteasome (prosome, macropain) subunit, beta type 4
Gpn2	391.653	-0.166527	0.0862405	-1.93096	0.0459756	GPN-loop GTPase 2
Ints7	743.191	-0.141622	0.073357	-1.93059	0.0459856	integrator complex subunit 7
Rpl18-ps2	6.93746	-0.2218	0.11489	-1.93053	0.0459856	ribosomal protein L18, pseudogene 2
Lysmd3	1204.28	0.288381	0.149375	1.93058	0.0459856	LysM, putative peptidoglycan-binding, domain containing 3
Usp22	1825.28	0.118162	0.061224	1.93	0.0460848	ubiquitin specific peptidase 22
Dusp19	146.232	-0.24331	0.126092	-1.92963	0.0461085	dual specificity phosphatase 19
1700037H04Rik	445.047	-0.20518	0.106351	-1.92928	0.0461085	RIKEN cDNA 1700037H04 gene
Bsg	13363.6	-0.127195	0.0659292	-1.92926	0.0461085	basigin
Runx1	177.55	-0.249658	0.129375	-1.92972	0.0461085	runt related transcription factor 1
Lipn	1.92307	0.163249	0.0846119	1.92939	0.0461085	lipase, family member N
Lipa	1805.02	0.268647	0.139271	1.92896	0.0461527	lysosomal acid lipase A
AC124778.1	1.15625	-0.160747	0.0833581	-1.92839	0.0462616	NA
Fbxo7	514.448	0.153802	0.079763	1.92824	0.0462668	F-box protein 7
Mb21d2	881.691	0.175853	0.0912087	1.92803	0.0462865	Mab-21 domain containing 2
Hspbp1	709.072	-0.19706	0.102218	-1.92785	0.0463006	HSPA (heat shock 70kDa) binding protein, cytoplasmic cochaperone 1
Ifi202b	310.161	0.21586	0.111998	1.92736	0.0463895	interferon activated gene 202B
4930442H23Rik	1.16791	-0.161478	0.0837924	-1.92712	0.0464162	RIKEN cDNA 4930442H23 gene
Slc22a4	656.365	0.289589	0.15028	1.927	0.0464162	solute carrier family 22 (organic cation transporter), member 4
Parp1	1770.95	-0.164018	0.0851374	-1.92651	0.0465064	poly (ADP-ribose) polymerase family, member 1
Ccdc163	223.549	-0.186986	0.0970944	-1.92582	0.0466059	coiled-coil domain containing 163
Mrpl17	1046.1	-0.195486	0.101513	-1.92572	0.0466059	mitochondrial ribosomal protein L17
Psmd11	1780.96	-0.126463	0.0656685	-1.92579	0.0466059	proteasome (prosome, macropain) 26S subunit, non-ATPase, 11
Chrna10	3.23016	-0.253226	0.131511	-1.92551	0.0466281	cholinergic receptor, nicotinic, alpha polypeptide 10
Dazap1	2753.78	-0.135313	0.0702803	-1.92533	0.0466407	DAZ associated protein 1
Dedd	210.303	0.171771	0.0892446	1.92472	0.0467007	death effector domain-containing
Olfr556	1.22819	-0.175667	0.0912696	-1.9247	0.0467007	olfactory receptor 556
2810030D12Rik	87.8457	0.243757	0.126637	1.92484	0.0467007	RIKEN cDNA 2810030D12 gene
Tefm	168.913	-0.193943	0.100778	-1.92445	0.0467316	transcription elongation factor, mitochondrial
Bin2	112.904	-0.285972	0.148619	-1.9242	0.046764	bridging integrator 2
Pappa	221.056	0.293351	0.152507	1.92352	0.0468655	pregnancy-associated plasma protein A
Celsr1	256.446	-0.291774	0.151695	-1.92342	0.0468655	cadherin, EGF LAG seven-pass G-type receptor 1
Cd274	155.651	0.293391	0.152537	1.92341	0.0468655	CD274 antigen
Timm17b	584.665	-0.180273	0.0937633	-1.92264	0.0470282	translocase of inner mitochondrial membrane 17b
Cdh6	40.9293	-0.283752	0.147598	-1.92246	0.0470396	cadherin 6
Fnbp4	1798.05	0.177307	0.0922774	1.92145	0.0472626	formin binding protein 4
Tmem19	1490.39	-0.18297	0.0952343	-1.92126	0.0472781	transmembrane protein 19
Gm18014	8.49263	-0.156293	0.081396	-1.92015	0.0475276	ribosomal protein S2 pseudogene
Smarcb1	1568.47	-0.180721	0.0942163	-1.91815	0.0480047	SWI/SNF related, matrix associated, actin dependent regulator of chromatin, subfamily b, member 1
Gatb	353.001	-0.208203	0.108579	-1.91753	0.0481317	glutamyl-tRNA(Gln) amidotransferase, subunit B
Flcn	851.401	0.270636	0.141155	1.91729	0.0481603	folliculin
Trbc1	19.4221	-0.2999	0.156489	-1.91643	0.0483499	T cell receptor beta, constant region 1
Ndufa10	3858.53	-0.220038	0.114839	-1.91605	0.0483833	NADH dehydrogenase (ubiquinone) 1 alpha subcomplex 10
Ppard	4326.02	-0.206799	0.107927	-1.91611	0.0483833	peroxisome proliferator activator receptor delta
Phf14	653.074	0.120083	0.0626861	1.91563	0.0484583	PHD finger protein 14
Gm45552	22.465	-0.304097	0.158784	-1.91516	0.0485477	NA
Cars	896.17	-0.174785	0.0912911	-1.91459	0.0486616	cysteinyl-tRNA synthetase
Zfyve1	1935.88	0.222612	0.116279	1.91446	0.0486616	zinc finger, FYVE domain containing 1
Cemip	156.317	0.296235	0.154757	1.9142	0.0486978	cell migration inducing protein, hyaluronan binding
Rtp4	368.737	0.261173	0.13646	1.91392	0.0487366	receptor transporter protein 4
Tmem182	18.9451	0.306313	0.160095	1.91332	0.0488602	transmembrane protein 182
Gm21399	11.0748	-0.271125	0.141747	-1.91273	0.0489808	peroxiredoxin pseudogene 2
Gm12176	27.0191	-0.299086	0.156389	-1.91245	0.0489893	predicted gene 12176
Gm16505	6.07727	0.292476	0.152928	1.91251	0.0489893	predicted gene 16505
Suclg1	5715.86	-0.187303	0.0979664	-1.91191	0.0490979	succinate-CoA ligase, GDP-forming, alpha subunit
Tfap2a	2.76544	-0.138719	0.0725704	-1.9115	0.04917	transcription factor AP-2, alpha
Gm44200	3.72955	0.215003	0.11251	1.91097	0.0492775	NA
Abhd3	800.489	-0.306494	0.160415	-1.91063	0.0493326	abhydrolase domain containing 3
1810008I18Rik	13.1572	-0.284846	0.149119	-1.9102	0.0494135	RIKEN cDNA 1810008I18 gene
Zfand2a	911.789	0.281712	0.147527	1.90956	0.0495478	zinc finger, AN1-type domain 2A
Mrpl39	966.252	-0.171305	0.0897238	-1.90925	0.0495973	mitochondrial ribosomal protein L39
Rptoros	8.95856	0.294621	0.154348	1.90881	0.049681	regulatory associated protein of MTOR, complex 1, opposite strand
Lamp1	12226.8	0.177919	0.0932421	1.90814	0.0498248	lysosomal-associated membrane protein 1
Fam134a	2104.02	0.159817	0.0837761	1.90767	0.0498445	family with sequence similarity 134, member A
Gm21781	393.01	0.228728	0.119911	1.90748	0.0498445	NA
Sf3b5	836.172	-0.194959	0.102195	-1.90771	0.0498445	splicing factor 3b, subunit 5
Gm4285	70.5032	0.250745	0.131464	1.90733	0.0498445	predicted gene 4285
Cyc1	8491.22	-0.223225	0.117037	-1.90731	0.0498445	cytochrome c-1
Uxt	113.446	-0.216387	0.113415	-1.90792	0.0498445	ubiquitously expressed transcript
Nod2	78.7691	-0.273117	0.143219	-1.90698	0.0498656	nucleotide-binding oligomerization domain containing 2
Sdr42e1	478.739	-0.195257	0.102386	-1.90707	0.0498656	short chain dehydrogenase/reductase family 42E, member 1
Mir3109	4.56084	0.270663	0.141966	1.90653	0.0499514	microRNA 3109

## Sheet: Differential gene_females
Gene	baseMean	log2FoldChange	lfcSE	stat	pvalue	padj	description
Rab30	615.376	1.05117	0.157399	6.67834	2.41672e-11	4.54851e-07	RAB30, member RAS oncogene family
2810408A11Rik	249.681	0.595551	0.0943803	6.31013	2.78809e-10	2.62373e-06	RIKEN cDNA 2810408A11 gene
Akr1c13	1980.39	0.631977	0.105834	5.97142	2.35202e-09	1.47558e-05	aldo-keto reductase family 1, member C13
Dbp	325.929	0.922297	0.159434	5.78482	7.25879e-09	3.41544e-05	D site albumin promoter binding protein
Ifit1bl1	853.499	-1.02326	0.184887	-5.53451	3.12107e-08	0.000117483	interferon induced protein with tetratricpeptide repeats 1B like 1
Fam35a	148.663	0.603029	0.110518	5.4564	4.85887e-08	0.000152415	family with sequence similarity 35, member A
Rnf144b	209.292	0.419964	0.0794724	5.28441	1.26113e-07	0.000339082	ring finger protein 144B
Cyp26b1	462.215	0.921278	0.183704	5.01503	5.30262e-07	0.00124751	cytochrome P450, family 26, subfamily b, polypeptide 1
Rab37	201.697	0.793981	0.159877	4.96621	6.82756e-07	0.00142779	RAB37, member RAS oncogene family
Npdc1	1189.42	-0.377838	0.0764436	-4.9427	7.70465e-07	0.00145009	neural proliferation, differentiation and control 1
AA467197	29.6851	-0.908505	0.186983	-4.85876	1.18121e-06	0.00173069	expressed sequence AA467197
Hlf	168.031	0.858936	0.176125	4.87684	1.07798e-06	0.00173069	hepatic leukemia factor
Akr1c19	2678.39	0.741268	0.152637	4.8564	1.19542e-06	0.00173069	aldo-keto reductase family 1, member C19
Lypd8	44689.4	-0.569201	0.117624	-4.83916	1.30389e-06	0.00175289	LY6/PLAUR domain containing 8
Aloxe3	17.2885	0.893273	0.187008	4.77665	1.78238e-06	0.00223641	arachidonate lipoxygenase 3
Rnasel	3073.58	-0.524451	0.110465	-4.74769	2.05756e-06	0.00242033	ribonuclease L (2', 5'-oligoisoadenylate synthetase-dependent)
1700025G04Rik	1211.84	0.256977	0.0545118	4.71416	2.42709e-06	0.00268707	RIKEN cDNA 1700025G04 gene
Adgra3	1595.52	-0.466608	0.0998376	-4.67367	2.95865e-06	0.00277486	adhesion G protein-coupled receptor A3
Dcun1d4	431.798	0.363803	0.0779694	4.66597	3.07168e-06	0.00277486	DCN1, defective in cullin neddylation 1, domain containing 4 (S. cerevisiae)
Gml	36.8473	-0.790825	0.169149	-4.67531	2.93512e-06	0.00277486	glycosylphosphatidylinositol anchored molecule like
Rgn	132.124	0.621337	0.13321	4.66434	3.09612e-06	0.00277486	regucalcin
Mid1	91.5747	-0.629472	0.136632	-4.60707	4.08386e-06	0.00349374	midline 1
Ormdl2	469.853	-0.339463	0.0754313	-4.50029	6.78594e-06	0.00510873	ORM1-like 2 (S. cerevisiae)
Ppp4r4	277.492	0.623937	0.138241	4.51341	6.3795e-06	0.00510873	protein phosphatase 4, regulatory subunit 4
Golm1	6700.82	-0.322988	0.071762	-4.50082	6.76929e-06	0.00510873	golgi membrane protein 1
Prom1	1262.1	-0.511196	0.114211	-4.4759	7.60896e-06	0.00550801	prominin 1
Trdmt1	136.809	0.559917	0.126621	4.42199	9.77979e-06	0.00657377	tRNA aspartic acid methyltransferase 1
Nat8f5	59.0491	0.770315	0.174028	4.4264	9.58193e-06	0.00657377	N-acetyltransferase 8 (GCN5-related) family member 5
Cdkn2d	245.816	-0.40045	0.0911827	-4.39173	1.12451e-05	0.00705481	cyclin-dependent kinase inhibitor 2D (p19, inhibits CDK4)
Cd14	892.286	-0.591107	0.13448	-4.39552	1.10509e-05	0.00705481	CD14 antigen
Fam83c	144.945	-0.533147	0.122218	-4.36227	1.28719e-05	0.00781489	family with sequence similarity 83, member C
Mapkapk3	595.499	-0.409096	0.0939607	-4.3539	1.33734e-05	0.00786564	mitogen-activated protein kinase-activated protein kinase 3
Tm4sf4	4827.49	0.751727	0.173158	4.34127	1.41664e-05	0.00807954	transmembrane 4 superfamily member 4
Sh3bp4	719.682	-0.396825	0.0924183	-4.29379	1.75647e-05	0.00884477	SH3-domain binding protein 4
Duox1	51.0578	-0.801282	0.186364	-4.29955	1.71146e-05	0.00884477	dual oxidase 1
Ceacam10	113.704	-0.738225	0.17133	-4.30878	1.64157e-05	0.00884477	carcinoembryonic antigen-related cell adhesion molecule 10
Slc6a3	24.9795	0.802119	0.186666	4.29708	1.7306e-05	0.00884477	solute carrier family 6 (neurotransmitter transporter, dopamine), member 3
Ssh3	1847.13	-0.335543	0.078213	-4.29012	1.78578e-05	0.00884477	slingshot homolog 3 (Drosophila)
Bbox1	28.5361	0.716167	0.168696	4.24532	2.18279e-05	0.0101299	butyrobetaine (gamma), 2-oxoglutarate dioxygenase 1 (gamma-butyrobetaine hydroxylase)
Gm3336	25.8661	-0.726243	0.1716	-4.23218	2.31436e-05	0.0101299	predicted gene 3336
Fam64a	81.7239	-0.63798	0.150654	-4.23475	2.2881e-05	0.0101299	family with sequence similarity 64, member A
Akr1c12	1259.67	0.386872	0.0912952	4.2376	2.25923e-05	0.0101299	aldo-keto reductase family 1, member C12
AC158535.1	16.89	0.786154	0.185391	4.24052	2.22998e-05	0.0101299	NA
Duox2	3032	-0.764623	0.181065	-4.22293	2.41147e-05	0.0103151	dual oxidase 2
Ces1e	300.712	0.557935	0.132372	4.21489	2.499e-05	0.0104519	carboxylesterase 1E
Nox4	43.3524	0.73426	0.17454	4.20682	2.58984e-05	0.0105964	NADPH oxidase 4
Serpinh1	4227.42	-0.324343	0.0786553	-4.1236	3.73001e-05	0.014327	serine (or cysteine) peptidase inhibitor, clade H, member 1
Gm3776	55.6809	0.646698	0.156631	4.12879	3.6467e-05	0.014327	predicted gene 3776
Ndrg1	4009.61	0.607449	0.147296	4.124	3.72343e-05	0.014327	N-myc downstream regulated gene 1
Rdh16	118.999	-0.615692	0.149741	-4.11173	3.92713e-05	0.0147825	retinol dehydrogenase 16
Ppef1	5.5705	-0.695468	0.169544	-4.10199	4.09617e-05	0.0151165	protein phosphatase with EF hand calcium-binding domain 1
Tspan1	3390.15	-0.572074	0.139686	-4.09543	4.21389e-05	0.0152519	tetraspanin 1
Chst4	1109.77	-0.752815	0.185469	-4.05899	4.92862e-05	0.0173011	carbohydrate (chondroitin 6/keratan) sulfotransferase 4
Gm379	26.1466	-0.701585	0.172918	-4.05732	4.96391e-05	0.0173011	syntaxin 3 pseudogene
Snph	396.203	-0.547532	0.136041	-4.02474	5.70376e-05	0.0195183	syntaphilin
Isg15	204.661	-0.662598	0.164925	-4.01757	5.88005e-05	0.0197622	ISG15 ubiquitin-like modifier
Ppp4r1l-ps	508.061	0.349735	0.0877808	3.98419	6.77113e-05	0.0216355	protein phosphatase 4, regulatory subunit 1-like, pseudogene
Acot7	814.502	-0.443576	0.111345	-3.9838	6.78229e-05	0.0216355	acyl-CoA thioesterase 7
Gprc5a	788.144	0.666461	0.16705	3.98958	6.61915e-05	0.0216355	G protein-coupled receptor, family C, group 5, member A
Slc35a2	1272.94	-0.389432	0.0978578	-3.97957	6.904e-05	0.0216567	solute carrier family 35 (UDP-galactose transporter), member A2
Gm28512	35.4728	-0.619077	0.156132	-3.9651	7.33659e-05	0.0225817	NA
Oasl2	836.947	-0.474935	0.120109	-3.95421	7.67881e-05	0.0225817	2'-5' oligoadenylate synthetase-like 2
Nlrx1	177.417	-0.536822	0.135759	-3.95422	7.67835e-05	0.0225817	NLR family member X1
Acox2	119.842	0.71826	0.181563	3.95598	7.62203e-05	0.0225817	acyl-Coenzyme A oxidase 2, branched chain
Reln	487.662	0.525766	0.133318	3.9437	8.02344e-05	0.0232303	reelin
Gm28373	71.5501	-0.525553	0.133387	-3.94006	8.14623e-05	0.0232303	NA
1700016C15Rik	182.047	0.692703	0.176152	3.93242	8.40939e-05	0.0232754	RIKEN cDNA 1700016C15 gene
Osbpl7	1591.42	-0.355535	0.0903857	-3.93353	8.37071e-05	0.0232754	oxysterol binding protein-like 7
B3gnt7	710.077	-0.734539	0.187042	-3.92713	8.59645e-05	0.0234484	UDP-GlcNAc:betaGal beta-1,3-N-acetylglucosaminyltransferase 7
Lrg1	446.953	-0.632703	0.162973	-3.88226	0.000103492	0.0278261	leucine-rich alpha-2-glycoprotein 1
Sema7a	776.625	0.537524	0.138694	3.87562	0.000106355	0.028193	sema domain, immunoglobulin domain (Ig), and GPI membrane anchor, (semaphorin) 7A
Duoxa1	24.8088	-0.701386	0.18133	-3.86801	0.000109728	0.0282903	dual oxidase maturation factor 1
Agpat4	558.398	-0.327397	0.0846169	-3.86917	0.000109207	0.0282903	1-acylglycerol-3-phosphate O-acyltransferase 4 (lysophosphatidic acid acyltransferase, delta)
Gm35570	4.75224	0.670023	0.173648	3.85852	0.000114077	0.0286273	predicted gene, 35570
Olfr1372-ps1	132.112	0.563587	0.145954	3.86139	0.000112744	0.0286273	olfactory receptor 1372, pseudogene 1
Dmbt1	46668	-0.716794	0.186508	-3.84323	0.000121425	0.0296797	deleted in malignant brain tumors 1
Ptprb	1205.92	0.534585	0.139012	3.84559	0.000120262	0.0296797	protein tyrosine phosphatase, receptor type, B
Wdr63	6.14889	0.69564	0.181423	3.83435	0.000125899	0.0303788	WD repeat domain 63
Msh3	519.199	0.26856	0.0701907	3.82615	0.000130165	0.0306858	mutS homolog 3
Gm21718	218.299	-0.655713	0.171399	-3.82564	0.000130432	0.0306858	NA
Ceacam1	4274.44	-0.590438	0.154635	-3.81827	0.000134393	0.0312272	carcinoembryonic antigen-related cell adhesion molecule 1
Reg3a	4689.68	-0.633513	0.166082	-3.81446	0.000136481	0.0313256	regenerating islet-derived 3 alpha
Sdr16c5	44.7311	0.569996	0.149825	3.80441	0.000142145	0.0314741	short chain dehydrogenase/reductase family 16C, member 5
Ighv7-1	13.6892	-0.686469	0.180324	-3.80686	0.00014074	0.0314741	immunoglobulin heavy variable 7-1
Gna14	53.8609	-0.669875	0.176043	-3.80518	0.000141701	0.0314741	guanine nucleotide binding protein, alpha 14
Srd5a1	643.996	0.480484	0.126465	3.79934	0.000145083	0.0317513	steroid 5 alpha-reductase 1
Aqp1	8596.61	0.522412	0.137725	3.79315	0.000148747	0.0321789	aquaporin 1
Tat	160.109	-0.570591	0.150995	-3.77888	0.000157532	0.0336922	tyrosine aminotransferase
Pla2g10	140.965	-0.378334	0.100554	-3.76251	0.000168215	0.0355727	phospholipase A2, group X
Per3	591.767	0.689823	0.183957	3.74992	0.000176893	0.0369924	period circadian clock 3
Ceacam2	4756.04	-0.582229	0.155596	-3.74193	0.000182611	0.0375957	carcinoembryonic antigen-related cell adhesion molecule 2
Capn5	762.183	-0.342994	0.0917014	-3.74034	0.000183774	0.0375957	calpain 5
Rps4l	477.018	-0.479202	0.128695	-3.72354	0.000196448	0.0389194	ribosomal protein S4-like
Pdia6	6079.22	-0.388492	0.104226	-3.72741	0.000193457	0.0389194	protein disulfide isomerase associated 6
Pdxdc1	4423.11	-0.278014	0.0746564	-3.72391	0.000196162	0.0389194	pyridoxal-dependent decarboxylase domain containing 1
Ifrd1	2210.93	0.599249	0.161096	3.71982	0.000199361	0.0390851	interferon-related developmental regulator 1
Emc7	1005.12	-0.199896	0.0539559	-3.7048	0.000211554	0.0401901	ER membrane protein complex subunit 7
2610008E11Rik	383.994	0.368002	0.0993263	3.70498	0.000211409	0.0401901	RIKEN cDNA 2610008E11 gene
Lgals3bp	4733.66	-0.280442	0.0756477	-3.70721	0.000209558	0.0401901	lectin, galactoside-binding, soluble, 3 binding protein
Oit1	650.167	-0.638094	0.172344	-3.70244	0.000213539	0.0401901	oncoprotein induced transcript 1
Agpat3	2733.94	0.389239	0.105628	3.685	0.000228706	0.0426185	1-acylglycerol-3-phosphate O-acyltransferase 3
Limk2	2840.96	-0.210431	0.0571791	-3.68021	0.000233043	0.0430009	LIM motif-containing protein kinase 2
Nans	2420.04	-0.317713	0.0864695	-3.67428	0.000238522	0.0431655	N-acetylneuraminic acid synthase (sialic acid synthase)
Pglyrp1	3131.27	-0.455403	0.123932	-3.67462	0.000238199	0.0431655	peptidoglycan recognition protein 1
Sult1a1	283.836	0.583004	0.158848	3.67021	0.000242352	0.0434409	sulfotransferase family 1A, phenol-preferring, member 1
Hist3h2a	62.4221	0.581712	0.158903	3.66079	0.000251435	0.04384	histone cluster 3, H2a
Arrdc3	939.587	0.477168	0.130203	3.66481	0.000247518	0.04384	arrestin domain containing 3
Hsp90ab1	28140.7	-0.32479	0.0887244	-3.66066	0.000251566	0.04384	heat shock protein 90 alpha (cytosolic), class B member 1
Hist1h1c	3587.27	0.377517	0.103246	3.65647	0.000255712	0.0441537	histone cluster 1, H1c
Gm7652	14.2847	0.644684	0.176772	3.64698	0.000265346	0.0454006	predicted gene 7652
Plekhm1	1537.24	-0.376771	0.103602	-3.63673	0.000276123	0.046819	pleckstrin homology domain containing, family M (with RUN domain) member 1
Gpx2	8839.04	-0.675989	0.186214	-3.63017	0.000283229	0.0475952	glutathione peroxidase 2
Vsig2	91.9514	0.540526	0.149338	3.61949	0.000295185	0.0481796	V-set and immunoglobulin domain containing 2
B3galt5	1710.93	-0.493182	0.136315	-3.61795	0.000296947	0.0481796	UDP-Gal:betaGlcNAc beta 1,3-galactosyltransferase, polypeptide 5
Adgrf5	1051.02	0.504932	0.139452	3.62084	0.000293652	0.0481796	adhesion G protein-coupled receptor F5
Batf2	468.135	-0.659059	0.181948	-3.62224	0.000292066	0.0481796	basic leucine zipper transcription factor, ATF-like 2
Irgm2	386.522	-0.606791	0.168022	-3.61137	0.000304581	0.0489959	immunity-related GTPase family M member 2
Mamdc4	383.49	0.67258	0.186928	3.59808	0.000320578	0.0497051	MAM domain containing 4
Ttc39a	747.515	-0.467397	0.12997	-3.5962	0.000322897	0.0497051	tetratricopeptide repeat domain 39A
Pparg	131.741	0.574971	0.159547	3.60376	0.000313646	0.0497051	peroxisome proliferator activated receptor gamma
Pex26	700.141	-0.304582	0.0846156	-3.5996	0.000318706	0.0497051	peroxisomal biogenesis factor 26
Mt2	549.944	0.655609	0.182385	3.59464	0.000324835	0.0497051	metallothionein 2
Meltf	73.1556	0.585107	0.162763	3.59483	0.000324604	0.0497051	NA
Ptk6	894.072	-0.669005	0.18626	-3.59177	0.000328436	0.0498508	PTK6 protein tyrosine kinase 6
