# Supplementary material for: Antibiotic-induced acceleration of type 1 diabetes alters maturation of innate intestinal immunity
Source: eLife. 2018 Jul 25;7:e37816. doi: 10.7554/eLife.37816 (PMC6085123; doi:10.7554/eLife.37816)
Supplement: Supplementary file 4. [file elife-37816-supp4.xlsx]

## Sheet: male_control_P12-P23
Up-regulated (total 69 genes)	Down-regulated (total 59 genes)
Tnfsf10	Ms4a1
Abcb10	Ltb
Ccl7	Cx3cl1
Cxcl11	Ccl19
Ccl8	Cd19
Fcgr4	Traf5
Cd163	Bid
C6	Cd83
Btnl1	Muc1
Btnl2	Tollip
Cd80	Clu
Il15	Cd2
Tnfaip6	Adal
Tlr1	Cxcl13
Il1b	Ccr7
C1qb	Cxcr5
Gzmb	Pax5
Cd9	Cd79b
Nfkbiz	Ccr6
Cxcl9	Defb1
Bcl3	C9
Pigr	Trem2
Mme	C3
Irak4	Stat2
Ctsc	Prdm1
Ltb4r1	Cd34
Ccl25	Cd1d1
Socs1	Il11ra1
Nfkbia	Cd3d
Zbtb7b	Ctss
Tnfrsf14	Tcf4
Xbp1	Ifnar1
Ccl9	Cfd
Pla2g2a	C2
Fkbp5	Il18r1
Irf8	Pdgfb
Psmb10	Tgfb3
Mif	Cradd
Irgm1	Cul9
Relb	Fyn
Ptpn22	Cxcl12
Il15ra	Camp
Cd14	Nox4
Ccl12	Rorc
Tfrc	Il10rb
Card9	Ifnar2
Il1rl1	Ccl20
Tlr3	Ncam1
Tmem173	Fcgrt
Socs3	Mr1
Il13ra1	Cd55
Cxcl10	Cd109
H2-K1	Tlr5
Itga6	Stat5b
Itgam	Cd46
Casp8	Igf2r
Gp1bb	Ifit2
Dpp4	Il1rl2
Il18	Ly96
Cd24a
Nos2
C1qbp
Itln1
Plau
Nox1
Msr1
Psmb9
Gm10499
Ccl2

## Sheet: male_control_P23-P42
Up-regulated (total 22 genes)	Down-regulated (total 18 genes)
Cd82	Gzmb
Ccl25	Cxcl9
C4a	Fcgr1
Bid	Icam4
Ccrl1	Tmem173
Cd83	Cxcl10
Cxcl13	Msr1
C7	Ccl2
Ifngr1	Runx1
Irf4	Cdh5
Prkcd	Jak3
Nfkb2	Ccr4
C3	Ccl24
Ikbke	Il1rl1
Slamf7	Socs3
Ctss	Il18
C4bp	Plau
Maf	Cfi
Relb
Tnfrsf17
Abcb1a
Tgfbi

## Sheet: male_1PAT_P12-P23
Up-regulated (total 62 genes)	Down-regulated (total 49 genes)
Ifi204	Ifnb1
Irf8	H60a
Fcgr4	Tnfsf18
Irgm1	Klra5
Ciita	Il11ra1
Syk	Cd96
Tap1	Cd160
H2-Aa	Il18rap
Psmb9	Cd79a
Phlpp2	Ccr2
Bcl3	Fcer1a
Pigr	C8g
Mme	Il2
Ccl25	Ccr4
Nfkbia	Il25
Cxcl11	Muc1
Zbtb7b	Il17f
Tnfrsf14	Il19
B2m	Tnfsf14
H2-Ab1	Ccl20
C4bp	Icam4
Ifi35	Ikzf4
Bst1	C8b
Ccl9	Tlr4
Pla2g2a	Ccr10
Fkbp5	Klra1
Psmb10	Frmpd4
Relb	Cd36
Cd163	Pdcd1lg2
Clu	Klra7
Cfb	Il23a
Cdkn1a	Pdcd1
Il15ra	Il21
Tfrc	Rag2
Il1rl1	Prdm1
Il22ra2	Cd1d1
Btnl1	Tal1
Tlr3	Tlr2
Il13ra1	Il18r1
Btnl2	Cxcr6
Prkcd	Pdgfb
Jak2	Fyn
H2-Eb1	Cxcl12
H2-K1	Camp
Gzma	Adal
Itga6	Ncam1
Itgam	Cd109
Casp8	Tlr5
Stat6	C9
Gp1bb
Dpp4
Il18
Il15
Cd24a
Tnfaip6
Nos2
C1qbp
Itln1
Plau
Gm10499
C1qa
C1qb

## Sheet: male_1PAT_P23_P42
Up-regulated (total 8 genes)	Down-regulated (total 3 genes)
Klra8	Ifit2
Tigit	Il1rl1
Il18	Icam2
Itln1
Ccl8
Ccl5
Tnfrsf17
Irf4
