# Supplementary material for: Antibiotic-induced acceleration of type 1 diabetes alters maturation of innate intestinal immunity
Source: eLife. 2018 Jul 25;7:e37816. doi: 10.7554/eLife.37816 (PMC6085123; doi:10.7554/eLife.37816)
Supplement: Supplementary file 5. [file elife-37816-supp5.xlsx]

## Sheet: Liver
Peptide	% of total for each sample	PAT F	PAT F	PAT F	PAT F	PAT M	PAT M	PAT M	PAT M	PAT M	Ctrl M	Ctrl M	Ctrl M	Ctrl M	Ctrl F	Ctrl F	Ctrl F	Ctrl F	Ave % of total	PAT_F	PAT_M	Ctrl_M	Ctrl_F	Fold Changes	PAT/Ctrl_M	PAT/Ctrl_F	T-test	PAT/Ctrl_M	PAT/Ctrl_F
H3: K18ac K23ac		1.94973	1.80526	1.9115	2.09362	2.56971	2.44756	2.27923	2.78875	2.00025	1.87252	1.83811	1.90324	2.64813	2.2942	1.85406	1.93442	1.98085		1.94003	2.4171	2.0655	2.01588		1.17022	0.962369		0.190561	0.532965
H3: K18ac/K23ac		26.3173	25.6359	27.3757	29.1043	30.0731	31.3101	27.1915	29.1923	32.0936	28.9324	28.3109	28.5073	26.7976	29.9565	28.8407	29.8349	30.3578		27.1083	29.9721	28.1371	29.7475		1.06522	0.911281		0.108385	0.0318444
H3: K18me1 K23un		0.358354	0.392288	0.368817	0.301438	0.352877	0.280699	0.282517	0.348646	0.231173	0.31067	0.374291	0.3453	0.468592	0.338166	0.439804	0.418221	0.307851		0.355224	0.299182	0.374713	0.37601		0.798431	0.94472		0.11893	0.598255
H3: K18un K23me1		0.0515776	0.0563609	0.0600728	0.0615977	0.0609833	0.0513197	0.0414004	0.0764026	0.0447155	0.0657762	0.077703	0.073598	0.0815278	0.0760802	0.0695502	0.0897757	0.0749723		0.0574022	0.0549643	0.0746513	0.0775946		0.736281	0.739771		0.0335602	0.0109744
H3: K18un K23un		71.3231	72.1102	70.284	68.439	66.9434	65.9103	70.2054	67.5939	65.6302	68.8186	69.399	69.1705	70.0041	67.3351	68.7959	67.7227	67.2785		70.5391	67.2566	69.3481	67.783		0.969842	1.04066		0.0610382	0.0321755
H3: K27me1 K36me1		1.88129	2.23347	1.33781	1.95004	1.49016	2.02902	2.00514	2.07082	2.20096	2.60974	3.3134	2.9893	2.98533	2.29495	1.96782	1.98718	2.0418		1.85065	1.95922	2.97444	2.07294		0.658686	0.892768		0.00138275	0.333312
H3: K27me1 K36me2		5.13898	4.88246	5.90158	5.2515	5.13122	5.12981	4.84438	5.13416	4.95705	4.25929	5.36433	5.71274	6.29268	5.26664	5.18358	5.14094	4.95625		5.29363	5.03932	5.40726	5.13685		0.931955	1.03052		0.454818	0.5316
H3: K27me1 K36me3		2.42608	2.31706	2.31784	3.15055	2.78524	2.96912	2.72261	2.61542	2.32507	1.98899	2.21222	2.34974	2.42742	2.25212	2.19286	2.43059	2.26525		2.55288	2.6835	2.24459	2.2852		1.19554	1.11713		0.0183508	0.277592
H3: K27me1 K36un		10.3262	8.83602	2.71699	9.26455	0.306467	10.6525	10.6195	9.91416	10.0059	10.2132	11.1089	11.8356	11.3582	10.7114	10.671	9.58121	9.20236		7.78594	8.2997	11.129	10.0415		0.745772	0.775377		0.232707	0.282822
H3: K27me2 K36me1		20.7757	19.8864	23.2191	21.1747	23.4033	20.5638	20.7245	20.1829	19.0717	17.9925	18.1255	18.5217	18.6198	19.3629	18.3872	19.4133	20.4969		21.264	20.7892	18.3149	19.4151		1.1351	1.09523		0.0241513	0.0758337
H3: K27me2 K36me2		1.15706	1.59512	1.71416	1.31893	1.62306	1.52434	1.24694	1.82129	2.16227	3.21755	3.75011	2.94961	2.11715	1.87883	2.23631	2.66851	2.27416		1.44632	1.67558	3.0086	2.26445		0.55693	0.638707		0.0214906	0.00810795
H3: K27me2 K36un		39.0742	38.5588	39.7704	35.529	41.2402	35.8564	35.8	37.785	40.6667	40.09	37.7054	37.2238	37.6839	37.4978	38.5293	37.1199	37.9915		38.2331	38.2697	38.1758	37.7846		1.00246	1.01187		0.945772	0.674325
H3: K27me3 K36me1		5.58288	5.74663	7.35294	7.45489	8.83815	7.66222	7.70444	5.96723	5.40591	4.46915	4.09037	4.43422	4.65603	5.23769	5.03343	6.02029	5.83334		6.53433	7.11559	4.41244	5.53119		1.61262	1.18136		0.0114759	0.141208
H3: K27me3 K36me2		0.397694	0.350423	0.480996	0.339397	0.33334	0.373997	0.270965	0.500562	0.616616	0.953178	1.21706	0.77188	0.647197	0.435355	0.540805	0.667771	0.51365		0.392128	0.419096	0.89733	0.539395		0.467048	0.726976		0.0215772	0.0499733
H3: K27me3 K36un		10.3905	11.0075	13.6046	10.551	11.7901	9.773	10.3812	10.1298	9.6081	9.28863	8.6989	9.10826	8.49583	11.1616	10.8248	10.551	11.2349		11.3884	10.3364	8.8979	10.9431		1.16167	1.04069		0.0169538	0.599058
H3: K27un K36me1		0.492619	0.508891	0.131436	0.432909	0.00403847	0.358688	0.462875	0.509567	0.57141	0.662524	0.87973	0.846814	0.816041	0.767949	0.636818	0.645631	0.586433		0.391464	0.381316	0.801277	0.659208		0.475885	0.59384		0.0104127	0.0483076
H3: K27un K36me2		0.0348021	1.31588	1.11744	0.775021	0.906631	0.73761	0.856426	0.930207	1.09212	1.61186	1.62626	1.62906	1.94589	1.48064	1.49383	1.6495	1.29499		0.810788	0.904599	1.70327	1.47974		0.531096	0.547925		0.000255464	0.0947766
H3: K27un K36un		2.32203	2.76134	0.334669	2.80754	2.14809	2.36953	2.36108	2.4389	1.31607	2.64331	1.90781	1.62729	1.95456	1.65206	2.30229	2.12413	1.30856		2.0564	2.12673	2.03324	1.84676		1.04598	1.11351		0.764709	0.755186
H3: K4me1		7.30112	5.76072	6.96301	6.54877	8.37509	9.73409	11.4074	7.16992	7.28155	8.46392	6.9865	6.92147	7.24984	6.78627	6.60165	13.8924	10.1133		6.6434	8.79362	7.40543	9.34843		1.18746	0.710644		0.169428	0.213245
H3: K4me2		0.729313	1.47223	0.761983	1.84548	1.24602	0.468067	0.419173	0.927165	1.44066	1.03867	1.88439	1.92859	0.916039	1.5579	0.935865	0.567797	0.89119		1.20225	0.900217	1.44192	0.988187		0.624317	1.21662		0.160424	0.557993
H3: K4me3		0.231361	0.473627	0.242673	0.632603	0.433849	0.229077	0.139881	0.326329	0.498511	0.363393	0.736437	0.657476	0.341228	0.484824	0.309473	0.190885	0.2973		0.395066	0.325529	0.524634	0.320621		0.620489	1.23219		0.154814	0.543698
H3: K4un		91.7382	92.2934	92.0323	90.9731	89.945	89.5688	88.0335	91.5766	90.7793	90.134	90.3927	90.4925	91.4929	91.171	92.153	85.3489	88.6982		91.7593	89.9806	90.628	89.3428		0.992857	1.02705		0.371362	0.209439
H3: K79me1		2.13575	1.68925	1.74116	1.98812	2.86151	0.246894	2.64845	2.61334	2.13428	3.64611	3.12482	2.93264	1.68415	2.99623	3.2425	1.87301	2.45684		1.88857	2.1009	2.84693	2.64215		0.737952	0.714785		0.277748	0.084561
H3: K79me2		19.123	17.0268	22.1513	14.1064	13.5681	97.3557	22.37	17.3441	14.7753	11.0786	10.757	10.741	13.061	17.4879	9.71383	12.429	17.6951		18.1019	33.0826	11.4094	14.3315		2.89959	1.26309		0.250524	0.197379
H3: K79un		78.7413	81.2839	76.1075	83.9054	83.5704	2.39736	74.9816	80.0426	83.0904	85.2753	86.1182	86.3264	85.2548	79.5158	87.0437	85.698	79.8481		80.0095	64.8165	85.7437	83.0264		0.755933	0.963664		0.252907	0.28612
H3: K9ac K14ac		0.447878	0.408728	0.517516	0.340262	0.566744	0.580919	0.445679	0.458496	0.423824	0.668268	0.456999	0.485681	0.508504	0.608073	0.538118	0.554684	0.696995		0.428596	0.495132	0.529863	0.599467		0.934453	0.714961		0.569584	0.0160802
H3: K9ac K14un		0.405093	0.390871	0.398397	0.277775	0.349331	0.387993	0.483898	0.378053	0.350893	0.462855	0.30958	0.330618	0.413691	0.371533	0.421944	0.556323	0.505751		0.368034	0.390033	0.379186	0.463888		1.02861	0.793369		0.811916	0.115306
H3: K9me1 K14ac		5.41226	5.6566	0.826744	6.21705	6.30036	8.06725	10.4147	6.35706	5.40486	6.33232	4.57479	5.83847	5.89944	6.22185	5.9287	11.2401	7.71688		4.52816	7.30884	5.66126	7.77688		1.29103	0.58226		0.144706	0.111577
H3: K9me1 K14un		4.42027	4.51842	1.37979	4.59094	2.65544	5.6174	7.12522	5.10944	4.0183	6.86984	5.30543	5.28176	5.37546	4.52904	4.99968	7.90498	4.66026		3.72736	4.90516	5.70812	5.52349		0.85933	0.674819		0.380344	0.159808
H3: K9me2 K14ac		15.5357	19.581	19.4037	20.6529	20.8724	12.9714	10.7749	16.2522	19.5728	13.1074	19.4578	14.8345	14.7767	20.4658	17.8935	8.83295	14.0046		18.7933	16.0887	15.5441	15.2992		1.03504	1.22839		0.823413	0.273458
H3: K9me2 K14un		31.3496	24.5985	31.3012	27.9541	25.6393	27.2669	25.8275	29.5436	30.429	28.9419	28.4268	30.1567	28.7452	25.4888	26.5889	25.039	28.5588		28.8009	27.7413	29.0677	26.4189		0.954368	1.09016		0.256708	0.249086
H3: K9me3 K14ac		5.53919	7.81935	7.16551	7.96786	7.15963	4.32455	3.70613	6.25344	7.67568	4.68065	7.51359	5.9742	5.49161	7.76784	6.41184	2.85298	5.16768		7.12298	5.82389	5.91501	5.55008		0.984595	1.2834		0.928607	0.246052
H3: K9me3 K14un		20.4358	20.1611	22.2175	18.1502	16.4996	18.6267	12.9898	19.529	16.1311	18.174	19.5538	20.35	19.4263	17.751	19.0791	12.9293	18.9127		20.2411	16.7552	19.376	17.168		0.86474	1.179		0.0829245	0.126941
H3: K9un K14ac		5.90464	6.57994	6.76768	4.79845	7.80986	9.19228	10.3519	5.80736	5.78109	7.76263	5.53835	6.12877	6.98537	6.21168	6.70966	10.2863	7.56245		6.01268	7.78849	6.60378	7.69251		1.1794	0.781628		0.294291	0.166201
H3: K9un K14un		10.5495	10.2855	10.0219	9.05053	12.1473	12.9646	17.8804	10.3114	10.2125	13.0001	8.86279	10.6193	12.3777	10.5845	11.4285	19.8034	12.2138		9.97685	12.7032	11.215	13.5076		1.1327	0.738612		0.40691	0.194952
H3.3: K27me1 K36me1		2.12342	1.94835	1.58499	2.01069	0.235648	2.38768	2.71074	2.52374	2.85578	2.64867	3.12407	3.09403	3.0328	2.82394	2.40622	2.09302	2.32782		1.91686	2.14272	2.97489	2.41275		0.720268	0.794472		0.161872	0.0440275
H3.3: K27me1 K36me2		14.3201	14.6787	16.9958	16.0318	21.6069	19.8166	17.5708	17.334	15.9581	12.9635	12.3959	12.5197	15.9043	16.6612	12.9364	17.2325	17.2382		15.5066	18.4573	13.4458	16.0171		1.37272	0.96813		0.00627164	0.690105
H3.3: K27me1 K36me3		10.6679	9.91444	10.7004	10.7739	11.25	11.652	11.4822	11.1262	11.1856	10.1823	10.2861	5.53627	6.65543	10.7418	6.4773	11.2392	10.6144		10.5142	11.3392	8.16503	9.76816		1.38875	1.07637		0.079252	0.551394
H3.3: K27me1 K36un		2.60913	2.5984	0.685965	2.70259	1.26284	2.34011	2.92483	3.16075	3.88151	3.59676	4.57921	4.95899	4.11239	3.84872	3.39395	2.66027	2.96733		2.14902	2.71401	4.31184	3.21757		0.629432	0.667903		0.0206474	0.116466
H3.3: K27me2 K36me1		25.4211	25.5522	25.8212	25.5503	26.1045	26.0021	26.0301	23.6483	22.2578	21.4573	19.9029	22.8	24.9435	21.8768	24.1816	24.8962	25.0954		25.5862	24.8085	22.2759	24.0125		1.11369	1.06554		0.106294	0.12219
H3.3: K27me2 K36me2		2.68469	2.85384	1.94504	1.13244	2.35769	1.51376	2.38015	1.8124	2.67151	6.16282	9.92169	8.42192	6.1252	3.01061	5.15692	4.46582	3.80005		2.154	2.1471	7.6579	4.10835		0.280377	0.524299		0.00771041	0.0184399
H3.3: K27me2 K36un		14.1165	13.7241	14.8892	15.4184	12.2879	12.469	11.7524	13.8922	14.4336	16.3011	13.7782	14.9156	12.9207	13.7736	15.6139	12.4429	12.6662		14.537	12.967	14.4789	13.6241		0.89558	1.06701		0.144298	0.320076
H3.3: K27me3 K36me1		5.04433	4.92285	5.63644	4.59708	4.78663	4.60486	4.79182	5.07997	5.32315	5.33974	5.19302	5.17724	5.32859	4.67335	5.18041	4.58236	4.82415		5.05018	4.91728	5.25965	4.81507		0.934907	1.04883		0.0519376	0.39726
H3.3: K27me3 K36me2		0.588425	0.700828	0.567329	0.379632	0.556148	0.462055	0.537416	0.628047	0.705501	2.1022	3.06359	2.17673	1.40606	0.851006	1.28095	1.36917	0.963441		0.559053	0.577833	2.18714	1.11614		0.264196	0.500881		0.0170462	0.0127552
H3.3: K27me3 K36un		5.23844	4.51334	5.66263	6.25405	4.88628	5.44708	5.11655	5.14653	4.23145	4.17876	3.60464	3.41932	3.15908	5.89887	5.37873	5.12716	5.73685		5.41711	4.96558	3.59045	5.5354		1.38299	0.97863		0.00268375	0.784084
H3.3: K27un K36me1		1.51373	1.3931	0.357998	1.35371	0.666625	1.44088	1.6178	1.69513	1.99135	1.87971	2.22966	2.17857	1.98439	2.02468	1.6415	1.57481	1.52497		1.15463	1.48236	2.06808	1.69149		0.716779	0.682613		0.0561466	0.137811
H3.3: K27un K36me2		13.9752	15.4746	14.9729	12.2768	12.6292	10.5715	11.5113	12.7234	13.6183	11.8331	10.811	13.5248	13.121	12.7416	14.9468	11.0857	11.4131		14.1749	12.2107	12.3225	12.5468		0.990931	1.12976		0.8951	0.200172
H3.3: K27un K36un		1.69717	1.72528	0.179985	1.51865	1.3697	1.29243	1.57382	1.22931	0.886405	1.35408	1.11	1.27684	1.3066	1.07394	1.40541	1.231	0.828031		1.28027	1.27033	1.26188	1.1346		1.0067	1.12839		0.948036	0.729023
H4: 0ac (K5, K8, K12, K16)		63.9423	63.3184	65.2553	58.04	75.5362	64.886	65.7775	62.3589	66.2597	59.4621	62.3504	62.8189	65.7117	66.2308	62.9186	62.6746	62.9435		62.639	66.9637	62.5858	63.6919		1.06995	0.983469		0.140055	0.585764
H4: 1ac ave (K5, K8, K12, K16)		30.1713	30.1387	31.5825	35.7352	20.4161	29.9902	28.9787	30.7543	26.9327	31.6068	29.2218	28.3562	26.9343	26.3015	28.7145	29.8647	29.0449		31.9069	27.4144	29.0298	28.4814		0.944355	1.12027		0.472424	0.0767981
H4: 2ac ave (K5, K8, K12, K16)		5.00928	5.60754	2.78851	5.32377	3.2037	4.35979	4.45516	5.88764	5.7789	7.49644	7.10534	7.4591	6.21662	6.11592	7.07347	6.23014	6.6628		4.68228	4.73704	7.06937	6.52058		0.670079	0.718077		0.00635998	0.0586734
H4: 3ac ave (K5, K8, K12,K16)		0.607367	0.665509	0.31548	0.606417	0.548213	0.530187	0.558089	0.704402	0.765358	1.11017	1.01697	1.02987	0.851855	1.03021	0.974987	0.897818	0.962535		0.548693	0.62125	1.00222	0.966386		0.619876	0.567778		0.00144361	0.00914434
H4: 4ac (K5, K8, K12, K16)		0.269793	0.269896	0.0582493	0.294603	0.295776	0.233741	0.23057	0.294731	0.263388	0.324542	0.305431	0.335971	0.285507	0.321653	0.318383	0.332693	0.38626		0.223135	0.263641	0.312863	0.339747		0.842673	0.656768		0.0290833	0.122674

## Sheet: Ileum
Peptide	% of total for each sample	PAT F	PAT F	PAT F	PAT F	PAT M	PAT M	PAT M	PAT M	PAT M	Ctrl M	Ctrl M	Ctrl M	Ctrl M	Ctrl F	Ctrl F	Ctrl F	Ctrl F	Ave % of total	PAT_F	PAT_M	Ctrl_M	Ctrl_F	Fold Changes	Male PAT/Ctrl	Female PAT/Ctrl	T-test	Male PAT/Ctrl	Female PAT/Ctrl
H3: K18ac K23ac		3.07739	3.3453	2.77693	3.12842	2.71768	2.8051	3.19578	3.08716	2.52115	3.38596	2.9908	3.03534	2.71333	2.72742	2.66911	2.57212	2.24917		3.08201	2.86538	3.03136	2.55446		0.945244	1.20652		0.400934	0.0160077
H3: K18ac/K23ac		30.941	26.8133	25.7216	27.3468	31.1929	28.3537	26.8291	27.2047	26.0855	26.6873	27.7472	29.5279	26.2799	28.4922	28.7073	29.174	26.5505		27.7057	27.9332	27.5605	28.231		1.01352	0.981392		0.75554	0.698095
H3: K18me1 K23un		0.271831	0.261535	0.298553	0.296911	0.229315	0.180582	0.284981	0.232284	0.262723	0.237579	0.23461	0.206127	0.295075	0.251868	0.278413	0.263409	0.254412		0.282208	0.237977	0.243348	0.262026		0.97793	1.07702		0.840444	0.124028
H3: K18un K23me1		0.0687604	0.0744139	0.0653674	0.0794414	0.0678063	0.0479678	0.0270752	0.0779229	0.0593161	0.0586077	0.0505547	0.0568727	0.0567141	0.0563876	0.0682198	0.0797567	0.057553		0.0719958	0.0560177	0.0556873	0.0654793		1.00593	1.09952		0.972132	0.348899
H3: K18un K23un		65.6411	69.5054	71.1375	69.1485	65.7923	68.6126	69.663	69.3979	71.0713	69.6306	68.9769	67.1738	70.655	68.4721	68.2769	67.9107	70.8884		68.8581	68.9074	69.1091	68.887		0.997083	0.99958		0.864631	0.983646
H3: K27ac K36un		0.0739354	0.0840005	0.0659951	0.0874627	0.0549052	0.0583163	0.0651185	0.0697111	0.0498681	0.0937467	0.0982555	0.0594872	0.0684888	0.0718974	0.0676881	0.058238	0.0641568		0.0778484	0.0595838	0.0799946	0.0654951		0.744849	1.18862		0.116478	0.0828322
H3: K27me1 K36me1		2.12633	2.8478	3.22953	2.52886	2.35922	2.68052	1.99126	1.92911	2.27252	3.02246	2.80198	2.84267	3.26116	2.58417	1.69533	2.11323	2.48462		2.68313	2.24653	2.98207	2.21934		0.753345	1.20898		0.00369393	0.185605
H3: K27me1 K36me2		6.6247	6.48289	8.25337	5.84075	6.48565	8.32332	7.0743	6.32249	5.58754	7.27495	6.65613	7.78806	8.05401	8.36343	6.43266	5.00472	6.99335		6.80043	6.75866	7.44329	6.69854		0.90802	1.01521		0.25658	0.910322
H3: K27me1 K36me3		3.24679	3.31103	3.39376	3.19463	3.05394	3.72417	3.63674	4.1015	3.53621	4.32624	4.02002	3.73124	3.92941	4.19282	3.37677	2.76893	3.37345		3.28656	3.61051	4.00172	3.42799		0.902239	0.958741		0.104965	0.663547
H3: K27me1 K36un		13.6037	11.6184	14.7112	15.1271	13.02	13.8842	14.3855	13.3869	14.7696	11.9406	15.0327	15.3764	16.1163	16.4994	12.3378	11.1228	12.3068		13.7651	13.8893	14.6165	13.0667		0.950243	1.05345		0.499534	0.641866
H3: K27me2 K36me1		13.723	13.2633	12.0847	15.4081	15.912	17.208	15.3086	14.9033	13.971	14.5361	15.101	15.096	16.0065	14.2321	14.7198	15.5742	13.8967		13.6198	15.4606	15.1849	14.6057		1.01815	0.932497		0.671365	0.266592
H3: K27me2 K36me2		2.24604	0.637119	3.88627	2.15337	1.38831	3.44433	3.5079	3.01395	1.97619	1.6648	2.28848	1.6273	1.17408	1.29728	1.33822	1.57336	1.26619		2.2307	2.66614	1.68866	1.36876		1.57884	1.62972		0.0873412	0.285273
H3: K27me2 K36un		39.1162	41.7828	37.8878	38.6708	38.7481	32.3776	34.4124	37.7062	38.3428	37.9481	34.3977	34.7178	29.9179	32.9809	40.3238	42.3051	39.7889		39.3644	36.3174	34.2454	38.8497		1.06051	1.01325		0.355447	0.826365
H3: K27me3 K36me1		2.62533	2.58556	2.39762	2.88336	2.98565	2.85141	3.23386	2.95575	3.0542	4.01244	4.02915	2.98731	3.07779	3.06965	2.97702	2.33651	2.66139		2.62297	3.01618	3.52667	2.76114		0.855247	0.949957		0.171345	0.508844
H3: K27me3 K36me2		0.49206	0.133923	0.739143	0.430014	0.226496	0.678506	1.04829	0.603347	0.426291	0.282729	0.453619	0.216723	0.226276	0.220611	0.292124	0.352942	0.235055		0.448785	0.596585	0.294837	0.275183		2.02344	1.63086		0.0944887	0.259143
H3: K27me3 K36un		8.029	8.59395	5.74811	7.21043	7.89034	5.79187	8.21445	7.47558	8.18668	6.99387	7.30113	6.76032	6.56067	6.22499	8.20822	9.52445	7.75375		7.39537	7.51179	6.904	7.92785		1.08803	0.932835		0.259415	0.583742
H3: K27un K36me1		0.921478	0.931305	0.993079	1.15713	0.745566	0.783614	0.720728	0.717387	0.672285	1.02339	1.05035	1.03871	1.16836	1.05651	0.791436	0.726275	0.993468		1.00075	0.727916	1.0702	0.891922		0.680167	1.12201		0.00035491	0.30532
H3: K27un K36me2		2.11563	2.63549	1.89949	2.29948	2.26208	2.63016	2.18798	2.168	1.77753	2.80826	2.59274	2.66858	2.48407	2.77095	2.82344	2.39424	2.86079		2.23752	2.20515	2.63841	2.71235		0.835787	0.824937		0.0302955	0.051011
H3: K27un K36un		5.05574	5.09248	4.70992	3.00851	4.86775	5.56397	4.21294	4.64677	5.37723	4.07219	4.17675	5.08936	7.95497	6.4353	4.61577	4.14489	5.32147		4.46666	4.93373	5.32332	5.12935		0.926816	0.870804		0.702758	0.381075
H3: K4me1		7.89605	9.84241	5.06612	9.46232	12.2643	10.4031	9.45218	7.83621	5.88782	7.35147	7.85743	6.70593	8.21254	9.19435	7.16449	6.67322	6.61309		8.06672	9.16872	7.53184	7.41129		1.21733	1.08844		0.213134	0.622
H3: K4me2		1.49123	0.860204	2.14958	1.42236	1.37287	2.32407	5.79013	0.773567	0.640784	2.51005	3.09335	2.2557	1.44691	1.27456	0.970334	2.01315	2.16438		1.48084	2.18028	2.32651	1.60561		0.937149	0.922296		0.890513	0.760105
H3: K4me3		0.576742	0.298135	0.768574	0.536397	0.561784	0.861245	2.24841	0.343255	0.25789	1.43864	1.42342	0.915232	0.524222	0.498902	0.399168	0.778324	0.806921		0.544962	0.854516	1.07538	0.620829		0.794619	0.877798		0.621146	0.607632
H3: K4un		90.036	88.9993	92.0157	88.5789	85.801	86.4116	82.5093	91.047	93.2135	88.6998	87.6258	90.1231	89.8163	89.0322	91.466	90.5353	90.4156		89.9075	87.7965	89.0663	90.3623		0.985743	0.994967		0.555775	0.639959
H3: K79me1		2.64312	2.20358	1.45239	0.888368	1.92838	1.53209	2.38291	1.97945	1.81477	1.56013	1.80414	1.77755	1.44206	1.97984	2.25251	1.27756	1.25499		1.79686	1.92752	1.64597	1.69123		1.17105	1.06246		0.131254	0.82876
H3: K79me2		10.4959	15.8845	15.8188	9.46129	16.2765	12.4006	6.83232	9.48957	9.35824	15.9063	14.1518	18.8705	7.13726	21.9191	9.11509	8.89799	13.0377		12.9151	10.8715	14.0165	13.2425		0.775621	0.975279		0.334882	0.929143
H3: K79un		86.861	81.912	82.7288	89.6503	81.7951	86.0673	90.7848	88.531	88.827	82.5335	84.0441	79.352	91.4207	76.101	88.6324	89.8244	85.7073		85.288	87.201	84.3376	85.0663		1.03395	1.00261		0.380987	0.953368
H3: K9ac K14ac		0.434213	0.802426	0.404965	0.371844	0.490471	0.303632	0.184633	0.30889	0.312978	0.375288	0.362256	0.585502	0.430264	0.57958	0.413414	0.291628	0.404924		0.503362	0.320121	0.438327	0.422387		0.730323	1.19171		0.140578	0.519457
H3: K9ac K14un		0.222173	0.407044	0.228019	0.220365	0.290172	0.198903	0.104013	0.211101	0.228907	0.22269	0.205731	0.296063	0.297824	0.348257	0.291623	0.286542	0.2529		0.269401	0.206619	0.255577	0.294831		0.808441	0.913747		0.244985	0.637246
H3: K9me1 K14ac		4.80364	7.4877	3.82307	6.12398	5.84526	5.01111	3.81098	5.49471	5.14229	4.28569	4.48897	4.78008	6.28271	7.46104	6.20899	5.27981	5.6349		5.5596	5.06087	4.95936	6.14619		1.02047	0.90456		0.864275	0.556182
H3: K9me1 K14un		5.91247	7.09005	4.66756	5.6316	5.01774	3.85078	3.50478	4.96061	4.24544	3.13955	3.2581	4.48806	4.6779	5.91739	5.20716	4.00212	4.6713		5.82542	4.31587	3.8909	4.94949		1.10922	1.17697		0.429553	0.224029
H3: K9me2 K14ac		20.2525	12.9315	17.6917	13.3042	18.9506	21.6834	26.0841	16.4981	16.0095	26.0492	23.4728	20.0064	18.9025	15.8818	16.3808	20.5033	19.0919		16.045	19.8451	22.1077	17.9645		0.897656	0.893152		0.391008	0.399407
H3: K9me2 K14un		26.1611	23.397	31.4171	28.8771	25.8179	27.755	25.8575	30.1288	30.2768	26.4651	28.2404	28.5376	28.6452	25.0396	27.3651	26.7826	27.4484		27.4631	27.9672	27.9721	26.6589		0.999826	1.03017		0.996622	0.683207
H3: K9me3 K14ac		7.50008	4.35459	6.02485	4.88332	6.75069	7.74871	9.94251	5.73366	5.68669	9.46395	8.21871	6.70459	6.30632	5.59608	5.67335	8.21687	6.60542		5.69071	7.17245	7.67339	6.52293		0.934717	0.872416		0.654502	0.403788
H3: K9me3 K14un		18.6437	17.5222	22.2513	23.1332	19.3319	20.1733	20.3455	21.3538	23.4291	17.9628	19.4948	18.6874	17.7347	19.0092	20.8464	21.2219	18.7485		20.3876	20.9267	18.4699	19.9565		1.13302	1.0216		0.0221701	0.787416
H3: K9un K14ac		7.54603	12.2451	5.31105	7.52163	8.61728	6.13717	4.13423	6.30536	6.07533	5.41448	6.09536	7.46604	7.46283	8.99374	7.36085	5.71326	6.99513		8.15595	6.25388	6.60968	7.26575		0.946169	1.12252		0.697449	0.608044
H3: K9un K14un		8.52407	13.7623	8.18038	9.93276	8.88804	7.13799	6.03169	9.00497	8.59294	6.62121	6.16289	8.44824	9.2598	11.1732	10.2523	7.70201	10.1466		10.0999	7.93113	7.62303	9.81853		1.04042	1.02865		0.753331	0.856808
H3.3: K27me1 K36me1		2.8442	2.29222	2.62792	2.66285	1.96425	2.3609	2.14087	1.73832	1.96808	2.25209	2.13787	2.16939	2.54029	2.64006	1.71747	1.57347	2.04694		2.6068	2.03449	2.27491	1.99449		0.894314	1.307		0.125914	0.0755589
H3.3: K27me1 K36me2		13.7754	15.0627	19.3895	18.8194	13.7555	15.9454	17.8337	15.9753	15.1969	19.6178	17.6441	19.2876	13.8369	19.1567	13.2766	9.51474	13.9242		16.7617	15.7414	17.5966	13.968		0.894569	1.20001		0.271829	0.296901
H3.3: K27me1 K36me3		7.60236	6.89568	8.64699	6.94318	8.02637	8.1503	9.08313	7.98466	7.64497	7.88744	7.20315	8.01525	6.94046	9.4189	7.56896	5.81515	6.87424		7.52205	8.17789	7.51158	7.41931		1.0887	1.01385		0.104963	0.910015
H3.3: K27me1 K36un		3.31757	3.30793	3.52409	3.99614	2.7768	3.26607	3.09818	2.69581	3.20474	3.62084	3.28789	2.92132	3.51028	3.39647	2.47123	2.52759	2.75703		3.53643	3.00832	3.33508	2.78808		0.902023	1.26841		0.141326	0.033136
H3.3: K27me2 K36me1		10.9927	11.042	10.4123	14.1805	12.9905	11.7798	15.5393	15.0558	15.5942	11.7424	13.7301	13.5057	13.6126	11.7055	10.2392	11.4353	9.40278		11.6569	14.1919	13.1477	10.6957		1.07942	1.08986		0.28785	0.383544
H3.3: K27me2 K36me2		4.91655	1.57709	6.31104	3.00304	1.93232	4.19977	4.874	5.46696	3.67235	3.92656	3.86673	3.35573	2.53921	1.57651	2.20995	2.59394	2.33641		3.95193	4.02908	3.42206	2.1792		1.17738	1.81348		0.410211	0.187183
H3.3: K27me2 K36un		19.1843	19.5503	12.9144	12.9382	16.1311	12.2513	12.3028	13.2949	16.8012	12.1184	14.3611	13.099	14.6007	13.5855	14.5015	17.023	20.5768		16.1468	14.1563	13.5448	16.4217		1.04514	0.983259		0.606012	0.913754
H3.3: K27me3 K36me1		2.81858	3.00718	2.0088	2.69191	3.04981	2.88638	3.24311	2.71803	3.04808	2.33201	2.57346	2.40407	3.21455	2.51618	2.57087	2.74225	2.14135		2.63162	2.98908	2.63102	2.49266		1.13609	1.05575		0.175562	0.605429
H3.3: K27me3 K36me2		0.716114	0.196671	1.2368	0.673168	0.323385	0.950412	0.999124	1.11839	0.809714	0.684723	0.744919	0.454782	0.292752	0.199186	0.35977	0.49339	0.334785		0.705687	0.840205	0.544294	0.346783		1.54366	2.03495		0.132474	0.190178
H3.3: K27me3 K36un		2.91397	3.57891	3.01082	4.23755	3.0559	2.43926	4.19214	4.63499	4.65364	4.32566	4.27038	3.26554	3.31337	3.6426	3.78448	4.46497	2.48216		3.43532	3.79519	3.79374	3.59355		1.00038	0.955966		0.997911	0.768722
H3.3: K27un K36me1		1.50482	1.40874	1.42594	1.1604	1.2294	1.42206	1.03363	0.951	0.92474	1.31283	1.43227	1.3097	1.56346	1.58389	1.37888	1.31019	1.48042		1.37498	1.11216	1.40457	1.43834		0.79182	0.955944		0.0369036	0.532952
H3.3: K27un K36me2		27.5867	29.9762	26.6273	27.7218	33.2995	32.011	23.8947	26.3927	24.4505	28.9693	27.4248	28.2632	30.7429	27.4236	37.8769	38.6127	33.0951		27.978	28.0097	28.85	34.2521		0.970871	0.816826		0.702308	0.0896958
H3.3: K27un K36un		1.82682	2.10447	1.86406	0.971852	1.46523	2.33738	1.76522	1.97315	2.03084	1.20988	1.32326	1.94873	3.29255	3.15493	2.04419	1.89327	2.54774		1.6918	1.91437	1.94361	2.41003		0.984954	0.701983		0.956461	0.106825
H4: 0ac (K5, K8, K12, K16)		51.5345	53.8976	49.6468	55.3753	57.8722	57.3699	57.92	54.918	54.434	49.2139	50.2144	52.1021	53.0339	53.1179	55.8262	54.9175	52.6737		52.6135	56.5028	51.1411	54.1338		1.10484	0.971916		0.00286655	0.349428
H4: 1ac ave (K5, K8, K12, K16)		42.6332	38.8111	43.2602	38.8539	36.1177	36.6865	36.4909	38.7109	39.1149	43.7108	41.9215	40.7818	39.6275	40.3027	36.8793	37.6211	39.7858		40.8896	37.4242	41.5104	38.6472		0.901561	1.05802		0.00955848	0.179768
H4: 2ac ave (K5, K8, K12, K16)		4.91445	6.02765	6.03889	4.69214	4.99884	4.96619	4.57108	5.35823	5.53045	5.7535	6.69644	5.93005	6.28522	5.38521	6.16063	6.34601	6.30005		5.41828	5.08496	6.1663	6.04797		0.824637	0.895884		0.00634066	0.195814
H4: 3ac ave (K5, K8, K12,K16)		0.665879	0.893741	0.785309	0.821052	0.716192	0.735574	0.744253	0.784266	0.671251	0.924467	0.872214	0.928785	0.794508	0.919385	0.866276	0.84836	0.962714		0.791495	0.730307	0.879994	0.899184		0.829901	0.880238		0.00914103	0.108028
H4: 4ac (K5, K8, K12, K16)		0.251962	0.369957	0.26879	0.257629	0.295109	0.241847	0.273712	0.228599	0.249446	0.397355	0.295382	0.257315	0.258848	0.27483	0.267564	0.266984	0.27774		0.287085	0.257743	0.302225	0.271779		0.852817	1.05631		0.276094	0.62171
		100	100	100	100	100	100	100	100	100	100	100	100	100	100	100	100	100
